# Supplementary material for: Regulatory Potential of bHLH-Type Transcription Factors on the Road to Rubber Biosynthesis in Hevea brasiliensis
Source: MDPI journal article supplement (doi:10.3390/plants9060674), 2020-05-26
Supplement: s1 [file s1]

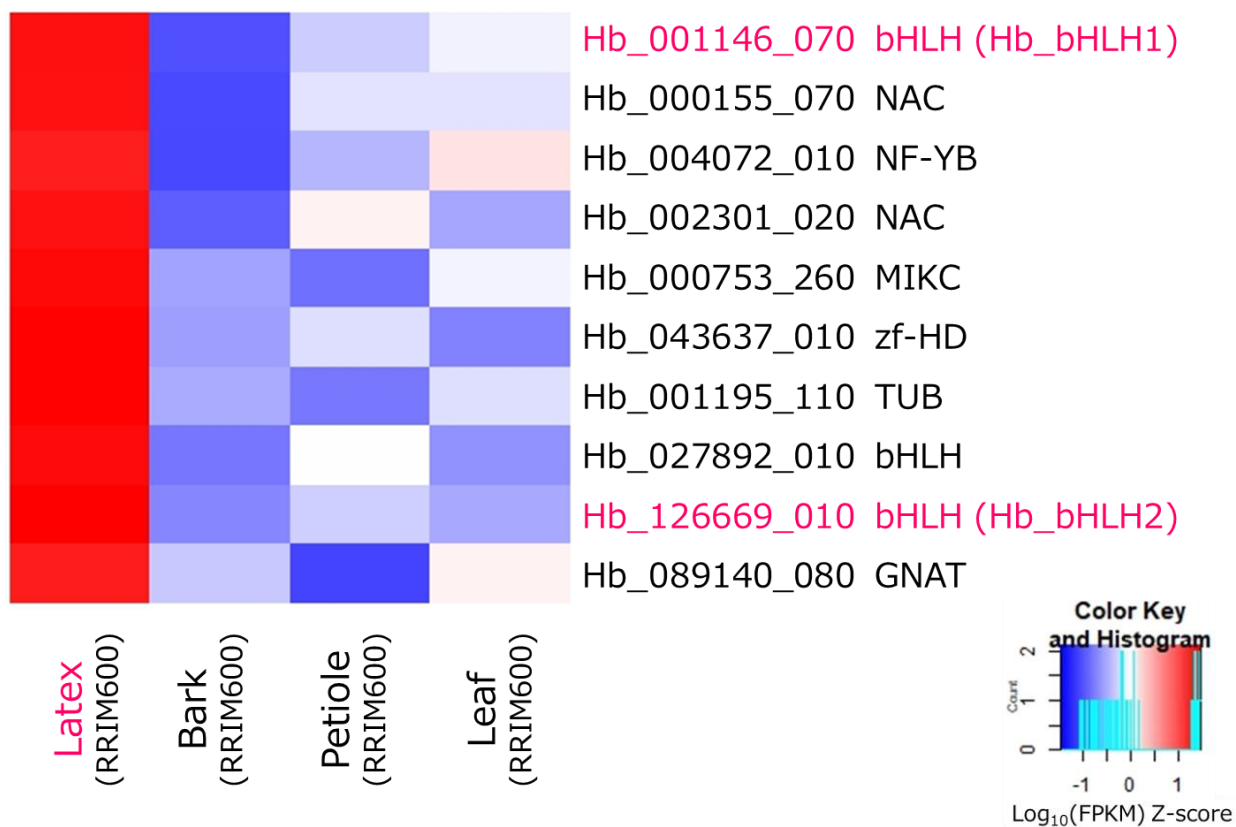

**Figure S1.** Heatmap of mRNA accumulation of 10 selected TF genes in tissue-specific RNA-seq analysis (Makita et al., 2017). They are highly expressed in latex. The TF family names are shown with the Gene IDs.

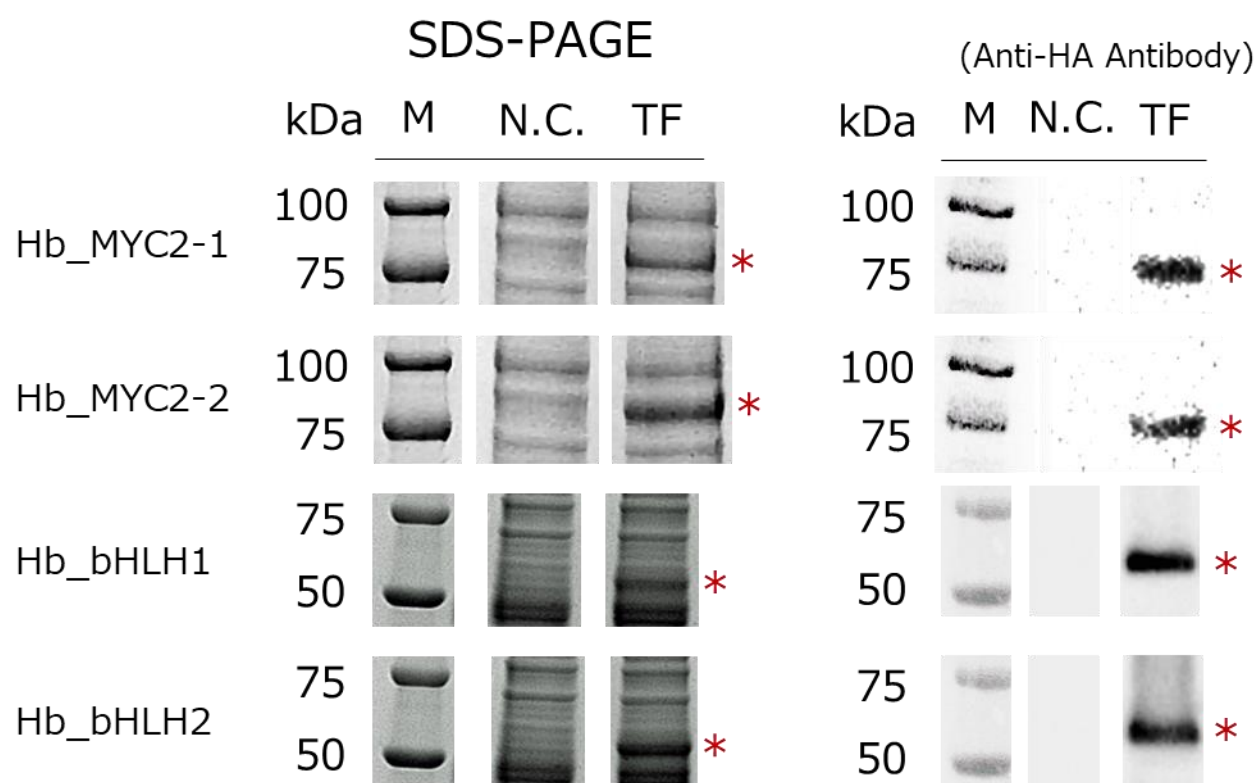

**Figure S2.** Detection of recombinant TF proteins by SDS-PAGE and western blot analysis. Recombinant proteins were synthesized in wheat germ extract. Asterisks indicate positions of recombinant proteins.
