# Supplementary material for: Regulatory Potential of bHLH-Type Transcription Factors on the Road to Rubber Biosynthesis in Hevea brasiliensis
Source: Plants (Basel). 2020 May 26;9(6):674. doi: 10.3390/plants9060674 (PMC7355734; doi:10.3390/plants9060674)
Supplement: Supplementary file 1 [file plants-09-00674-s001.zip › Supplementary_data/Supplementary_Tables.xlsx]

## Sheet: Table S1
Table S1. Primers used in this work.
Primer name	sequence
bHLH1_F	5'-AAAAACTCGAGATGGAGGAGATAGCGTCGCCA-3'
bHLH1_R	5'-AAAAAAGCGGCCGCTTAAGCATAATCTGGTACATCATATGGATAGTTCTGCATTCTTTGAAGAATAGC-3'
bHLH2_F	5'-AGTCCTCGAGATGGAGGAGATAACGTCCCA-3'
bHLH2_R	5'-ACTGGCGGCCGCTTAAGCATAATCTGGTACATCATATGGATAGTTTTGCATTCTTTGAA-3'
HbMYC2-1_F	5'-AAACTCGAGATGACGGACTATCGGATAACGC-3'
HbMYC2-1_R	5'-AAAGCGGCCGCTCAAGCATAATCTGGTACATCATATGGATAGGTGTCACCAACTTTGGTTGATAG-3'
HbMYC2-2_F	5'-AAACTCGAGATGACGGACTATCGTATACCACC-3'
HbMYC2-2_R	5'-AAAGCGGCCGCTCAAGCATAATCTGGTACATCATATGGATAGGTGTCACCAACTTTGGTTGATAA-3'
SP6p*	5'-CAAGCTATTTAGGTGACACTATAG-3'
bHLH1_R2*	5'-TTTTTTTTTTTTTTTTTTTTGCGGCCGCTTAAGCATAATC-3'
*These primers were used for production of a DNA template for in vitro transcription reaction of Hb_bHLH1.

## Sheet: Table S2
Table S2. List of DEGs
4h_up	4h_down	24h_up	24h_down	5d_up	5d_down
Hb_000000_130	Hb_000002_350	Hb_000007_460	Hb_000003_850	Hb_000016_170	Hb_000000_280
Hb_000002_360	Hb_000003_740	Hb_000010_120	Hb_000010_130	Hb_000018_120	Hb_000024_150
Hb_000023_250	Hb_000012_460	Hb_000010_440	Hb_000010_320	Hb_000031_350	Hb_000025_320
Hb_000025_590	Hb_000030_160	Hb_000028_340	Hb_000025_520	Hb_000041_060	Hb_000027_170
Hb_000027_110	Hb_000035_430	Hb_000029_370	Hb_000060_030	Hb_000056_210	Hb_000030_230
Hb_000028_080	Hb_000035_500	Hb_000062_080	Hb_000061_350	Hb_000069_360	Hb_000041_210
Hb_000029_370	Hb_000045_050	Hb_000086_190	Hb_000061_380	Hb_000069_510	Hb_000056_110
Hb_000042_340	Hb_000069_290	Hb_000116_530	Hb_000065_080	Hb_000072_110	Hb_000058_180
Hb_000045_180	Hb_000076_060	Hb_000120_530	Hb_000096_110	Hb_000072_170	Hb_000069_620
Hb_000057_050	Hb_000086_160	Hb_000120_630	Hb_000120_360	Hb_000086_410	Hb_000107_100
Hb_000081_020	Hb_000088_020	Hb_000122_010	Hb_000172_150	Hb_000098_090	Hb_000111_370
Hb_000081_030	Hb_000099_210	Hb_000127_020	Hb_000172_610	Hb_000107_140	Hb_000116_420
Hb_000107_610	Hb_000115_270	Hb_000142_050	Hb_000193_250	Hb_000116_140	Hb_000120_440
Hb_000115_310	Hb_000120_360	Hb_000152_530	Hb_000205_180	Hb_000152_880	Hb_000123_330
Hb_000116_430	Hb_000130_230	Hb_000155_140	Hb_000215_150	Hb_000160_130	Hb_000149_090
Hb_000126_110	Hb_000134_130	Hb_000156_210	Hb_000260_110	Hb_000189_150	Hb_000163_270
Hb_000128_090	Hb_000140_180	Hb_000157_010	Hb_000281_120	Hb_000252_260	Hb_000164_160
Hb_000160_190	Hb_000161_200	Hb_000161_230	Hb_000291_210	Hb_000256_090	Hb_000175_020
Hb_000185_170	Hb_000170_170	Hb_000165_210	Hb_000310_100	Hb_000284_100	Hb_000175_490
Hb_000186_090	Hb_000175_300	Hb_000170_080	Hb_000320_370	Hb_000291_160	Hb_000210_240
Hb_000211_070	Hb_000192_030	Hb_000186_090	Hb_000327_370	Hb_000331_430	Hb_000313_060
Hb_000235_010	Hb_000213_020	Hb_000190_100	Hb_000357_080	Hb_000380_010	Hb_000320_050
Hb_000251_100	Hb_000242_020	Hb_000221_090	Hb_000416_080	Hb_000381_140	Hb_000327_190
Hb_000264_220	Hb_000256_060	Hb_000251_100	Hb_000421_130	Hb_000392_100	Hb_000329_010
Hb_000302_090	Hb_000260_730	Hb_000256_070	Hb_000424_090	Hb_000424_160	Hb_000329_290
Hb_000331_530	Hb_000261_390	Hb_000260_230	Hb_000463_130	Hb_000438_190	Hb_000359_290
Hb_000363_150	Hb_000320_320	Hb_000260_740	Hb_000465_050	Hb_000438_220	Hb_000378_030
Hb_000373_060	Hb_000325_070	Hb_000286_240	Hb_000482_070	Hb_000454_070	Hb_000413_170
Hb_000375_250	Hb_000357_140	Hb_000300_570	Hb_000529_200	Hb_000538_290	Hb_000416_080
Hb_000380_130	Hb_000375_180	Hb_000302_070	Hb_000563_510	Hb_000621_060	Hb_000432_070
Hb_000383_020	Hb_000375_200	Hb_000318_260	Hb_000565_010	Hb_000622_080	Hb_000454_150
Hb_000398_130	Hb_000403_100	Hb_000344_030	Hb_000574_270	Hb_000645_160	Hb_000532_060
Hb_000402_060	Hb_000503_040	Hb_000363_330	Hb_000576_030	Hb_000690_170	Hb_000563_600
Hb_000411_020	Hb_000518_040	Hb_000373_060	Hb_000723_290	Hb_000692_010	Hb_000668_100
Hb_000457_130	Hb_000527_020	Hb_000375_250	Hb_000739_010	Hb_000692_110	Hb_000679_080
Hb_000465_380	Hb_000552_090	Hb_000395_090	Hb_000753_180	Hb_000699_180	Hb_000679_110
Hb_000488_040	Hb_000589_230	Hb_000398_200	Hb_000768_080	Hb_000712_060	Hb_000733_210
Hb_000497_250	Hb_000672_120	Hb_000427_080	Hb_000803_040	Hb_000742_220	Hb_000748_080
Hb_000509_040	Hb_000690_150	Hb_000483_050	Hb_000834_120	Hb_000753_190	Hb_000836_640
Hb_000513_110	Hb_000694_030	Hb_000513_110	Hb_000860_030	Hb_000800_060	Hb_000907_090
Hb_000523_100	Hb_000711_030	Hb_000517_040	Hb_000861_010	Hb_000834_040	Hb_000951_120
Hb_000567_060	Hb_000792_120	Hb_000521_010	Hb_000925_040	Hb_000928_050	Hb_000984_220
Hb_000575_130	Hb_000813_160	Hb_000523_100	Hb_000948_070	Hb_000961_060	Hb_001047_170
Hb_000617_340	Hb_000816_010	Hb_000539_080	Hb_000956_090	Hb_000996_160	Hb_001104_040
Hb_000645_250	Hb_000816_050	Hb_000552_030	Hb_001004_110	Hb_001085_240	Hb_001114_070
Hb_000659_010	Hb_000856_210	Hb_000566_150	Hb_001009_310	Hb_001097_100	Hb_001123_100
Hb_000668_070	Hb_000866_040	Hb_000574_380	Hb_001085_040	Hb_001104_080	Hb_001205_030
Hb_000720_110	Hb_000925_060	Hb_000608_250	Hb_001102_010	Hb_001104_200	Hb_001226_140
Hb_000789_150	Hb_000931_040	Hb_000608_450	Hb_001109_180	Hb_001123_120	Hb_001247_020
Hb_000796_180	Hb_000940_020	Hb_000654_060	Hb_001135_140	Hb_001221_570	Hb_001266_060
Hb_000836_560	Hb_000958_010	Hb_000656_120	Hb_001141_200	Hb_001242_040	Hb_001268_400
Hb_000860_060	Hb_001004_080	Hb_000661_080	Hb_001157_050	Hb_001242_090	Hb_001300_130
Hb_000959_240	Hb_001114_080	Hb_000676_070	Hb_001159_050	Hb_001289_020	Hb_001459_090
Hb_000965_020	Hb_001141_150	Hb_000676_380	Hb_001195_650	Hb_001357_100	Hb_001461_020
Hb_001005_210	Hb_001148_100	Hb_000684_370	Hb_001205_020	Hb_001386_090	Hb_001544_080
Hb_001231_010	Hb_001195_410	Hb_000705_020	Hb_001227_070	Hb_001433_020	Hb_001546_110
Hb_001268_150	Hb_001221_340	Hb_000705_100	Hb_001328_030	Hb_001454_100	Hb_001623_580
Hb_001277_040	Hb_001221_360	Hb_000707_060	Hb_001343_120	Hb_001473_120	Hb_001635_020
Hb_001277_120	Hb_001279_240	Hb_000742_190	Hb_001369_400	Hb_001477_070	Hb_001663_100
Hb_001277_150	Hb_001310_050	Hb_000803_050	Hb_001405_260	Hb_001498_050	Hb_001907_100
Hb_001277_350	Hb_001376_020	Hb_000853_410	Hb_001486_020	Hb_001507_020	Hb_001951_030
Hb_001331_040	Hb_001377_410	Hb_000984_150	Hb_001488_120	Hb_001675_040	Hb_001953_070
Hb_001408_080	Hb_001442_050	Hb_000984_190	Hb_001514_130	Hb_001687_050	Hb_001958_030
Hb_001417_060	Hb_001454_110	Hb_001006_050	Hb_001514_200	Hb_001720_060	Hb_002026_030
Hb_001488_250	Hb_001473_120	Hb_001019_030	Hb_001532_050	Hb_001723_020	Hb_002028_110
Hb_001631_100	Hb_001507_070	Hb_001021_030	Hb_001623_050	Hb_001741_110	Hb_002049_030
Hb_001635_050	Hb_001946_150	Hb_001021_110	Hb_001631_080	Hb_001779_040	Hb_002154_030
Hb_001638_120	Hb_001948_060	Hb_001073_030	Hb_001663_060	Hb_001838_050	Hb_002169_050
Hb_001688_070	Hb_001975_080	Hb_001080_310	Hb_001722_110	Hb_001842_060	Hb_002307_280
Hb_001726_080	Hb_002003_090	Hb_001124_200	Hb_002095_060	Hb_001847_060	Hb_002445_020
Hb_001863_100	Hb_002026_190	Hb_001143_090	Hb_002097_070	Hb_001959_110	Hb_002478_040
Hb_001922_100	Hb_002028_070	Hb_001159_070	Hb_002110_210	Hb_001975_030	Hb_002524_030
Hb_002016_020	Hb_002030_050	Hb_001189_030	Hb_002211_040	Hb_001999_080	Hb_002600_130
Hb_002027_180	Hb_002030_190	Hb_001195_160	Hb_002235_080	Hb_001999_100	Hb_002685_120
Hb_002039_030	Hb_002045_020	Hb_001205_280	Hb_002249_150	Hb_002042_080	Hb_002760_020
Hb_002042_040	Hb_002234_070	Hb_001289_070	Hb_002447_020	Hb_002045_040	Hb_003001_090
Hb_002042_200	Hb_002374_510	Hb_001358_120	Hb_002918_130	Hb_002081_010	Hb_003025_030
Hb_002235_390	Hb_002636_060	Hb_001369_070	Hb_003050_050	Hb_002170_080	Hb_003057_120
Hb_002272_080	Hb_002701_110	Hb_001374_050	Hb_003337_080	Hb_002171_050	Hb_003097_070
Hb_002471_190	Hb_002811_150	Hb_001396_090	Hb_003411_120	Hb_002205_180	Hb_003166_020
Hb_002522_020	Hb_002874_210	Hb_001417_060	Hb_004055_060	Hb_002235_070	Hb_003207_100
Hb_002534_080	Hb_002875_080	Hb_001473_120	Hb_004162_150	Hb_002235_280	Hb_003362_050
Hb_002615_050	Hb_002894_090	Hb_001473_150	Hb_004236_040	Hb_002235_370	Hb_003427_070
Hb_002760_020	Hb_003078_060	Hb_001552_010	Hb_004291_030	Hb_002235_390	Hb_003446_040
Hb_002762_010	Hb_003090_050	Hb_001632_010	Hb_004324_020	Hb_002321_040	Hb_003470_100
Hb_002835_020	Hb_003267_050	Hb_001680_050	Hb_004607_180	Hb_002370_030	Hb_003666_040
Hb_002920_010	Hb_003327_050	Hb_001726_090	Hb_004724_470	Hb_002374_060	Hb_003768_040
Hb_002960_050	Hb_003405_050	Hb_001751_060	Hb_004732_070	Hb_002374_360	Hb_003777_220
Hb_003043_060	Hb_003450_010	Hb_001758_110	Hb_004800_020	Hb_002471_310	Hb_003845_030
Hb_003207_120	Hb_003582_070	Hb_001780_130	Hb_004837_230	Hb_002482_040	Hb_003847_170
Hb_003237_040	Hb_003894_110	Hb_001948_020	Hb_005298_030	Hb_002656_040	Hb_003913_060
Hb_003466_010	Hb_003938_010	Hb_001950_120	Hb_005357_170	Hb_002660_040	Hb_003972_040
Hb_003581_240	Hb_003952_110	Hb_001963_110	Hb_005618_030	Hb_002836_090	Hb_004079_040
Hb_003582_010	Hb_003994_120	Hb_001972_020	Hb_005618_040	Hb_002897_010	Hb_004108_120
Hb_003642_020	Hb_003996_030	Hb_002001_030	Hb_005839_140	Hb_002929_010	Hb_004306_080
Hb_003736_010	Hb_004076_060	Hb_002066_050	Hb_005918_020	Hb_002950_090	Hb_004308_010
Hb_003940_040	Hb_004228_030	Hb_002073_040	Hb_006075_030	Hb_003032_020	Hb_004410_030
Hb_003992_130	Hb_004280_010	Hb_002218_070	Hb_006076_030	Hb_003120_070	Hb_004604_030
Hb_004136_030	Hb_004531_060	Hb_002234_070	Hb_006210_030	Hb_003181_050	Hb_004635_020
Hb_004218_310	Hb_004586_270	Hb_002249_200	Hb_007218_060	Hb_003370_050	Hb_004846_180
Hb_004241_100	Hb_004607_060	Hb_002272_090	Hb_007270_020	Hb_003376_070	Hb_004994_050
Hb_004648_110	Hb_004832_010	Hb_002276_170	Hb_007574_030	Hb_003376_360	Hb_005170_050
Hb_004659_110	Hb_004925_020	Hb_002284_320	Hb_007760_030	Hb_003579_040	Hb_005253_020
Hb_004785_120	Hb_004965_060	Hb_002311_260	Hb_007765_050	Hb_003581_140	Hb_005305_030
Hb_004811_010	Hb_004968_050	Hb_002475_080	Hb_008143_020	Hb_003678_020	Hb_005305_050
Hb_004979_050	Hb_005000_160	Hb_002518_250	Hb_008225_100	Hb_003740_010	Hb_005408_100
Hb_005010_040	Hb_005375_030	Hb_002524_010	Hb_009662_030	Hb_003752_110	Hb_005463_040
Hb_005120_010	Hb_005542_150	Hb_002601_140	Hb_010050_010	Hb_003849_080	Hb_005548_010
Hb_005380_030	Hb_005605_020	Hb_002615_010	Hb_010812_020	Hb_003911_050	Hb_005614_050
Hb_005432_010	Hb_005652_010	Hb_002766_070	Hb_012404_020	Hb_003992_240	Hb_005643_040
Hb_005463_060	Hb_006152_040	Hb_002783_060	Hb_015934_030	Hb_004097_040	Hb_005656_120
Hb_005463_140	Hb_006501_120	Hb_002784_100	Hb_016371_010	Hb_004122_060	Hb_005686_120
Hb_005678_030	Hb_006775_110	Hb_002799_130	Hb_017434_010	Hb_004223_080	Hb_006018_070
Hb_005679_120	Hb_006869_020	Hb_002805_200	Hb_021888_060	Hb_004230_060	Hb_006061_040
Hb_005754_030	Hb_007044_260	Hb_002835_020	Hb_029622_060	Hb_004242_160	Hb_006120_140
Hb_005779_030	Hb_007073_010	Hb_002849_120	Hb_030954_020	Hb_004324_210	Hb_006455_020
Hb_005888_040	Hb_007136_010	Hb_002890_210	Hb_032733_030	Hb_004445_090	Hb_006738_050
Hb_005888_060	Hb_007904_010	Hb_002929_030	Hb_034482_030	Hb_004448_090	Hb_006787_090
Hb_006198_180	Hb_009449_110	Hb_002974_040	Hb_037964_010	Hb_004846_220	Hb_006911_020
Hb_006973_030	Hb_009823_010	Hb_003071_040	Hb_039057_010	Hb_004943_020	Hb_007166_050
Hb_007130_020	Hb_010068_050	Hb_003077_060	Hb_047583_010	Hb_005000_220	Hb_007386_040
Hb_007137_060	Hb_010402_050	Hb_003177_050	Hb_049827_010	Hb_005276_200	Hb_007680_020
Hb_007289_010	Hb_011947_020	Hb_003209_060	Hb_053543_010	Hb_005489_120	Hb_007747_180
Hb_007741_140	Hb_012395_260	Hb_003216_070	Hb_074979_010	Hb_005701_100	Hb_007765_070
Hb_008173_020	Hb_012508_030	Hb_003333_050	Hb_074979_030	Hb_005873_010	Hb_007769_040
Hb_008566_060	Hb_012539_100	Hb_003349_070	Hb_088080_040	Hb_006360_030	Hb_007885_090
Hb_008643_150	Hb_013420_050	Hb_003453_010	Hb_088500_010	Hb_006570_020	Hb_010162_010
Hb_008725_080	Hb_013818_050	Hb_003506_070	Hb_092458_010	Hb_006794_010	Hb_011161_090
Hb_008834_010	Hb_013877_020	Hb_003634_020	Hb_097969_010	Hb_006827_020	Hb_011609_100
Hb_009040_010	Hb_020400_040	Hb_003645_040	Hb_100506_010	Hb_007218_100	Hb_012053_040
Hb_009693_010	Hb_022693_020	Hb_003680_250	Hb_100521_010	Hb_007416_280	Hb_012092_040
Hb_010003_010	Hb_023661_010	Hb_003760_040	Hb_108557_010	Hb_007426_020	Hb_012340_050
Hb_010315_100	Hb_024714_060	Hb_003861_150	Hb_118707_010	Hb_007441_340	Hb_012423_050
Hb_010647_010	Hb_034482_010	Hb_003902_060	Hb_120496_010	Hb_007904_190	Hb_012678_010
Hb_010761_030	Hb_034498_010	Hb_004033_020	Hb_130192_030	Hb_007926_010	Hb_012691_010
Hb_010863_030	Hb_044478_010	Hb_004055_170	Hb_138607_010	Hb_007951_120	Hb_012707_010
Hb_011486_030	Hb_047163_010	Hb_004055_180	Hb_146006_010	Hb_008103_120	Hb_012799_130
Hb_011537_130	Hb_050953_010	Hb_004057_050	Hb_162557_010	Hb_008725_240	Hb_016172_020
Hb_011540_030	Hb_052764_100	Hb_004116_050	Hb_164255_010	Hb_009083_010	Hb_026196_020
Hb_011552_020	Hb_062192_020	Hb_004117_180	Hb_165739_010	Hb_009393_180	Hb_027450_010
Hb_011671_160	Hb_063480_020	Hb_004117_320	Hb_166074_010	Hb_009736_020	Hb_028872_040
Hb_012022_020	Hb_067466_010	Hb_004218_060	Hb_177179_010	Hb_010003_010	Hb_030312_010
Hb_012305_020	Hb_077562_020	Hb_004223_080	Hb_185666_010	Hb_010337_040	Hb_032260_030
Hb_012506_080	Hb_085682_010	Hb_004241_040	Hb_189208_040	Hb_010531_030	Hb_033045_010
Hb_012796_050	Hb_097347_010	Hb_004297_050		Hb_011344_030	Hb_034507_040
Hb_015354_010	Hb_099046_010	Hb_004303_040		Hb_011465_040	Hb_035995_010
Hb_016120_020	Hb_099084_010	Hb_004330_040		Hb_011970_040	Hb_040734_010
Hb_016306_020	Hb_099990_020	Hb_004332_060		Hb_011972_010	Hb_040991_010
Hb_016637_020	Hb_100821_010	Hb_004346_010		Hb_013420_030	Hb_042491_010
Hb_018133_070	Hb_104735_020	Hb_004545_020		Hb_014658_010	Hb_048883_010
Hb_019763_010	Hb_106677_010	Hb_004574_010		Hb_014894_010	Hb_048898_010
Hb_020141_020	Hb_108576_020	Hb_004712_080		Hb_018133_060	Hb_050241_010
Hb_020301_010	Hb_111868_010	Hb_004837_080		Hb_021596_060	Hb_052761_010
Hb_020581_030	Hb_112145_010	Hb_004855_020		Hb_021888_040	Hb_054123_010
Hb_021537_010	Hb_135811_040	Hb_004871_030		Hb_024857_010	Hb_065953_010
Hb_026437_020	Hb_135959_010	Hb_004970_130		Hb_027405_010	Hb_068576_010
Hb_027214_060	Hb_162999_010	Hb_004994_120		Hb_029610_010	Hb_073395_010
Hb_027445_080	Hb_165566_010	Hb_005288_210		Hb_031862_170	Hb_081344_010
Hb_028795_010	Hb_167170_010	Hb_005298_060		Hb_032202_170	Hb_084886_010
Hb_029920_050	Hb_176368_010	Hb_005333_100		Hb_033908_010	Hb_093084_070
Hb_031685_010	Hb_178968_080	Hb_005396_110		Hb_034083_010	Hb_094022_010
Hb_032496_020	Hb_181441_010	Hb_005542_010		Hb_044164_010	Hb_105427_010
Hb_033594_040	Hb_183191_020	Hb_005643_020		Hb_053073_010	Hb_105866_010
Hb_034243_040	Hb_184239_010	Hb_005648_030		Hb_054233_020	Hb_106274_010
Hb_060236_010	Hb_185299_010	Hb_005694_100		Hb_057321_010	Hb_114336_020
Hb_061383_010	Hb_186115_010	Hb_005701_080		Hb_069147_010	Hb_116635_010
Hb_067130_010	Hb_186145_010	Hb_005743_030		Hb_071130_020	Hb_122408_010
Hb_067197_030		Hb_006040_030		Hb_074836_020	Hb_123954_010
Hb_071130_020		Hb_006061_030		Hb_075812_010	Hb_126380_010
Hb_072537_010		Hb_006120_200		Hb_083493_010	Hb_132082_010
Hb_076233_010		Hb_006738_060		Hb_087793_010	Hb_135811_040
Hb_077694_010		Hb_007120_070		Hb_106411_010	Hb_146675_010
Hb_081228_010		Hb_007125_010		Hb_119316_010	Hb_156850_100
Hb_081351_010		Hb_007181_010		Hb_128582_010	Hb_169426_010
Hb_081864_010		Hb_007254_030		Hb_132998_010	Hb_170193_030
Hb_094452_010		Hb_007416_110		Hb_142522_010	Hb_170935_010
Hb_095471_010		Hb_007520_040		Hb_150299_030	Hb_180378_010
Hb_099136_010		Hb_007545_220		Hb_153112_030	Hb_182249_010
Hb_100855_010		Hb_007595_030		Hb_166876_010	Hb_183191_020
Hb_100928_010		Hb_007747_190		Hb_168000_010	Hb_183610_010
Hb_101370_010		Hb_007818_020		Hb_169116_010	Hb_187697_010
Hb_106099_010		Hb_007850_020		Hb_170973_010
Hb_106728_020		Hb_008078_030		Hb_178968_100
Hb_109309_010		Hb_008143_050		Hb_179138_010
Hb_114310_010		Hb_008315_020		Hb_184705_010
Hb_121052_010		Hb_008516_020
Hb_128196_020		Hb_008536_020
Hb_136033_010		Hb_008727_040
Hb_138455_010		Hb_009158_020
Hb_141296_010		Hb_009182_010
Hb_143769_010		Hb_009434_030
Hb_148986_010		Hb_009687_020
Hb_153208_010		Hb_009848_030
Hb_154504_010		Hb_010162_010
Hb_154646_010		Hb_010417_090
Hb_158144_020		Hb_010534_040
Hb_162249_010		Hb_011486_030
Hb_164337_010		Hb_011791_010
Hb_165396_010		Hb_011861_020
Hb_167020_010		Hb_011903_030
Hb_169893_010		Hb_011909_130
Hb_172293_010		Hb_012404_080
Hb_184942_010		Hb_012532_030
		Hb_013405_090
		Hb_014873_010
		Hb_015299_040
		Hb_015401_010
		Hb_018202_030
		Hb_018202_060
		Hb_018279_020
		Hb_018691_020
		Hb_019026_050
		Hb_019592_010
		Hb_020248_010
		Hb_020378_010
		Hb_022693_080
		Hb_025477_050
		Hb_027402_120
		Hb_028077_020
		Hb_033006_040
		Hb_033153_040
		Hb_034642_010
		Hb_035398_010
		Hb_035935_010
		Hb_038508_010
		Hb_039435_010
		Hb_041139_010
		Hb_041813_080
		Hb_042799_010
		Hb_048883_010
		Hb_059952_010
		Hb_060391_010
		Hb_064692_010
		Hb_068804_100
		Hb_074511_010
		Hb_075503_010
		Hb_081344_010
		Hb_088176_010
		Hb_090510_010
		Hb_091336_010
		Hb_091384_010
		Hb_094437_040
		Hb_095471_010
		Hb_100105_010
		Hb_101808_010
		Hb_103465_010
		Hb_105033_010
		Hb_106274_010
		Hb_106496_010
		Hb_106596_010
		Hb_110798_010
		Hb_111693_010
		Hb_112023_010
		Hb_115376_010
		Hb_116702_010
		Hb_119316_010
		Hb_119504_010
		Hb_120820_010
		Hb_130194_010
		Hb_131940_010
		Hb_146023_010
		Hb_154146_010
		Hb_158092_060
		Hb_159709_010
		Hb_159791_010
		Hb_160837_010
		Hb_162249_010
		Hb_162286_010
		Hb_165350_010
		Hb_166876_010
		Hb_168031_010
		Hb_176775_010
		Hb_176819_010
		Hb_177772_010
		Hb_185951_010

## Sheet: Table S3
Table S3. Rubber biosynthesis-related genes
Gene ID	MYC2-1 binding	MYC2-2 binding	bHLH1 binding	bHLH2 binding	Short name	Annotation with Pathway name	RRIM600_Latex_FPKM	NT0h_FPKM	D4h_FPKM	M4h_FPKM	D24h_FPKM	M24h_FPKM	D5d_FPKM	M5d_FPKM	GO	GO_category
Hb_001638_290					PD1	MVA pathway: Pyruvate dehydrogenase	170.565	36.3475	28.6515	26.3898	38.2859	34.4088	30.5876	31.0984	kinase activity	molecular_function
Hb_006420_080					PD2	MVA pathway: Pyruvate dehydrogenase	27.6223	34.589	51.6669	55.235	60.2053	61.0345	58.6008	60.0071	kinase activity	molecular_function
Hb_132840_110					PD3	MVA pathway: Pyruvate dehydrogenase	19.0983	4.42828	5.26138	4.80133	7.067	6.71844	3.65639	3.29839	kinase activity	molecular_function
Hb_001500_040					PD4	MVA pathway: Pyruvate dehydrogenase	17.4951	10.9123	14.2495	14.8459	16.8829	17.7736	13.9749	14.9863	kinase activity	molecular_function
Hb_116349_120					PD5	MVA pathway: Pyruvate dehydrogenase	15.1036	81.6625	108.284	118.04	74.0567	78.0194	83.2805	81.7664	kinase activity	molecular_function
Hb_001123_160					PD6	MVA pathway: Pyruvate dehydrogenase	14.6908	105.522	128.29	128.92	132.25	126.424	130.335	134.135	kinase activity	molecular_function
Hb_027506_040					PD7	MVA pathway: Pyruvate dehydrogenase	12.1221	54.1172	53.6642	50.4663	46.5449	43.9313	56.1725	54.4712	kinase activity	molecular_function
Hb_003397_030					PD8	MVA pathway: Pyruvate dehydrogenase	7.83418	18.2631	16.5307	15.541	24.0438	22.1439	18.0882	18.3406	kinase activity	molecular_function
Hb_000800_090					PDC1	MVA pathway: Dihydrolipoyllysine-residue acetyltransferase component 1 of pyruvate dehydrogenase complex	1.68661	12.8061	16.3236	16.4007	16.761	17.0358	11.8417	12.9511	transferase activity	molecular_function
Hb_005306_180					PDC2	MVA pathway: Dihydrolipoyllysine-residue acetyltransferase component 2 of pyruvate dehydrogenase complex	19.066	82.253	101.04	108.229	107.493	110.373	85.4231	87.0555	protein metabolic process	biological_process
Hb_002477_290	*		*	*	PDC3	MVA pathway: Dihydrolipoyllysine-residue acetyltransferase component 2 of pyruvate dehydrogenase complex	3.87094	33.5941	36.5898	36.8671	38.0898	38.8502	41.2294	40.0808	protein metabolic process	biological_process
Hb_000110_310					PDC4	MVA pathway: Dihydrolipoyllysine-residue acetyltransferase component 4 of pyruvate dehydrogenase complex	7.60321	19.7189	24.4445	24.9176	28.424	29.6495	22.2543	21.6206	secondary metabolic process	biological_process
Hb_003411_090					PDC5	MVA pathway: Dihydrolipoyllysine-residue acetyltransferase component 4 of pyruvate dehydrogenase complex	5.62302	13.1368	19.1504	17.1917	14.0037	12.736	13.1832	14.0587	transferase activity	molecular_function
Hb_000207_300					PDC6	MVA pathway: Dihydrolipoyllysine-residue acetyltransferase component 5 of pyruvate dehydrogenase complex	14.9856	23.0856	35.7599	35.006	42.3444	38.012	21.3037	25.0335	transferase activity	molecular_function
Hb_002876_240					PDC7	MVA pathway: Dihydrolipoyllysine-residue acetyltransferase component 5 of pyruvate dehydrogenase complex	2.26942	4.15679	4.86382	6.03039	3.73541	4.41313	2.75025	3.55337	transferase activity	molecular_function
Hb_001723_060					DLD1	MVA pathway: Dihydrolipoamide dehydrogenase	27.0817	102.887	117.424	117.356	102.212	99.7606	103.662	102.945	cellular homeostasis	biological_process
Hb_002217_100					DLD2	MVA pathway: Dihydrolipoamide dehydrogenase	14.12	174.943	294.612	309.984	375.505	374.621	155.504	152.603	cellular homeostasis	biological_process
Hb_000645_180					DLD3	MVA pathway: Dihydrolipoamide dehydrogenase	7.42872	25.9512	31.6961	28.3146	39.4983	38.1913	25.5046	23.3895	cellular homeostasis	biological_process
Hb_012305_100					DLD4	MVA pathway: Dihydrolipoamide dehydrogenase	3.88968	3.55834	3.37704	2.86285	5.55067	5.04454	3.34358	3.91506	cellular homeostasis	biological_process
Hb_000613_200					AACT1	MVA pathway: Acetyl-CoA acetyltransferase	1062.52	62.4511	57.6782	56.4023	53.2749	54.4515	85.8957	86.7326	cell differentiation	biological_process
Hb_000184_040					AACT2	MVA pathway: Acetyl-CoA acetyltransferase	203.567	24.6116	14.7214	14.1104	21.4906	19.9722	20.1128	19.6773	transferase activity	molecular_function
Hb_000377_090					AACT3	MVA pathway: Acetyl-CoA acetyltransferase	20.2851	47.9301	40.9262	39.0482	33.9005	35.1896	54.9473	52.0938	protein metabolic process	biological_process
Hb_000795_060					AACT4	MVA pathway: Acetyl-CoA acetyltransferase	1.03369	0.285936	0.329575	0.266194	0.345319	0.478127	0.424429	0.265554	protein metabolic process	biological_process
Hb_004032_440				*	HMGR1	MVA pathway: Hydroxymethylglutaryl coenzyme A reductase	629.924	59.7761	41.9002	39.7334	51.718	47.0661	46.2681	42.6534	membrane	cellular_component
Hb_001153_150					HMGR2	MVA pathway: Hydroxymethylglutaryl coenzyme A reductase	66.9411	23.5675	17.2686	17.2548	22.2609	21.6289	19.057	17.3894	transferase activity	molecular_function
Hb_014497_120					HMGR3	MVA pathway: Hydroxymethylglutaryl coenzyme A reductase	21.4437	11.9942	9.69795	8.60439	14.8592	13.1762	10.3091	11.3215	regulation of gene expression, epigenetic	biological_process
Hb_142382_010					HMGR4	MVA pathway: Hydroxymethylglutaryl coenzyme A reductase	0.093953	10.3602	10.661	10.1662	14.1957	14.7256	16.46	15.453	membrane	cellular_component
Hb_000116_530					HMGR5	MVA pathway: Hydroxymethylglutaryl coenzyme A reductase	0	0.180619	0.95552	0.867154	0.903638	1.49677	1.16725	1.15192	membrane	cellular_component
Hb_003207_110	*				HMGS1	MVA pathway: Hydroxymethylglutaryl coenzyme A synthase	435.479	12.732	16.8475	19.3732	16.3023	18.7923	11.0377	12.1512	transferase activity	molecular_function
Hb_000107_440					HMGS2	MVA pathway: Hydroxymethylglutaryl coenzyme A synthase	5.84483	94.4047	113.086	127.545	59.6502	61.4126	82.0911	83.4919	membrane	cellular_component
Hb_035273_030					MK1	MVA pathway: Mevalonate kinase	52.7235	25.3574	25.6247	25.0654	25.7459	23.3527	36.3095	36.6862	kinase activity	molecular_function
Hb_127194_010					MK2	MVA pathway: Mevalonate kinase	10.2727	13.2097	10.7811	10.703	12.6224	12.7858	16.7261	17.1633	kinase activity	molecular_function
Hb_002042_080	*				MK3	MVA pathway: Mevalonate kinase	0.259408	1.0865	0.466837	0.708425	0.984361	0.870903	0.611444	1.53326
Hb_002759_250					PMK1	MVA pathway: Phosphomevalonate kinase	157.649	44.2027	41.491	41.2935	46.8645	44.7594	48.4312	51.1922	nucleotide binding	molecular_function
Hb_116349_100					PMK2	MVA pathway: Phosphomevalonate kinase	11.7962	5.19292	6.8798	6.64727	6.66832	8.07047	4.75402	4.56563	kinase activity	molecular_function
Hb_000539_030					MDC1	MVA pathway: Mevalonate diphosphate decarboxylase	27.6475	13.9103	12.2219	12.1045	15.6268	13.7205	14.3112	11.0325	kinase activity	molecular_function
Hb_000721_030					MDC2	MVA pathway: Mevalonate diphosphate decarboxylase	6.52213	14.1476	14.0079	14.53	14.3854	14.581	12.7833	13.4409	kinase activity	molecular_function
Hb_003185_080					DXS1	MEP pathway: 1-deoxy-D-xylulose-5-phosphate synthase	22.5506	8.93822	6.65422	7.47661	5.98219	6.34037	9.41457	7.68084	transferase activity	molecular_function
Hb_062135_030					DXS2	MEP pathway: 1-deoxy-D-xylulose-5-phosphate synthase	11.5136	10.5285	10.3594	10.2863	12.5521	12.7081	9.441	10.3046	transferase activity	molecular_function
Hb_019153_040					DXS3	MEP pathway: 1-deoxy-D-xylulose-5-phosphate synthase	9.11003	0.571913	1.97214	2.53207	0.777463	1.10355	0.709041	0.853618	transferase activity	molecular_function
Hb_002473_110					DXS4	MEP pathway: 1-deoxy-D-xylulose-5-phosphate synthase	5.93598	36.159	30.9746	30.7006	28.1688	28.2798	30.717	30.4476	transferase activity	molecular_function
Hb_021596_070	*	*	*	*	DXS5	MEP pathway: 1-deoxy-D-xylulose-5-phosphate synthase	0.174053	0.193082	0.115413	0.237747	0.264034	0.358928	0.209403	0.214324	transferase activity	molecular_function
Hb_000046_120					DXS6	MEP pathway: 1-deoxy-D-xylulose-5-phosphate synthase	0.108443	0.166604	0.0928142	0.100674	0.21166	0.220084	0	0.0509853	transferase activity	molecular_function
Hb_005628_050					DXS7	MEP pathway: 1-deoxy-D-xylulose-5-phosphate synthase	0.0655883	4.01063	47.7837	46.4643	36.1201	31.9913	17.3259	17.7816	transferase activity	molecular_function
Hb_012796_050					DXS8	MEP pathway: 1-deoxy-D-xylulose-5-phosphate synthase	0	0.0360025	2.1469	3.77829	0.767916	1.00739	0.404961	0.616867	transferase activity	molecular_function
Hb_124247_030					DXS9	MEP pathway: 1-deoxy-D-xylulose-5-phosphate synthase	0	0.248064	0.447591	0.269971	0.639689	0.483526	0.049899	0	transferase activity	molecular_function
Hb_007520_020					DXR1	MEP pathway: 1-deoxy-D-xylulose 5-phosphate reductoisomerase	62.257	5.66343	54.4977	58.613	9.79643	11.9691	7.95089	7.73504	cellular process	biological_process
Hb_000922_160					DXR2	MEP pathway: 1-deoxy-D-xylulose 5-phosphate reductoisomerase	1.18912	3.58319	2.14667	1.72636	3.67757	4.1001	1.24061	1.38856	cellular process	biological_process
Hb_029142_030					MCT1	MEP pathway: 2-C-methyl-D-erythritol 4-phosphate cytidylyltransferase	10.15	5.28011	7.26782	6.78745	6.29823	7.77773	6.74658	7.85265	transferase activity	molecular_function
Hb_007576_140					MCT2	MEP pathway: 2-C-methyl-D-erythritol 4-phosphate cytidylyltransferase	2.00556	6.7019	22.4362	23.7696	11.632	15.2554	13.1114	15.2959	transferase activity	molecular_function
Hb_000453_240	*				CMK1	MEP pathway: 4-(cytidine 5'-diphospho)-2-C-methyl-D-erythritol kinase	0.347956	11.696	31.2059	35.909	34.674	38.7384	25.2905	22.3183	kinase activity	molecular_function
Hb_001975_040					CMK2	MEP pathway: 4-(cytidine 5'-diphospho)-2-C-methyl-D-erythritol kinase	0.176343	11.0629	58.7121	65.193	25.3455	30.3721	13.8305	17.5556	kinase activity	molecular_function
Hb_177215_030					MDS1	MEP pathway: 2-C-methyl-D-erythritol 2,4-cyclodiphosphate synthase	4.04653	9.78007	25.1448	30.4472	13.5487	14.4132	13.4466	14.4277	cell differentiation	biological_process
Hb_002529_090					MDS2	MEP pathway: 2-C-methyl-D-erythritol 2,4-cyclodiphosphate synthase	3.99861	48.1001	72.4051	80.0603	45.2386	51.7115	73.3507	69.7341	cellular process	biological_process
Hb_000029_350					HDS1	MEP pathway: 4-hydroxy-3-methylbut-2-en-1-yl diphosphate synthase	16.4264	19.473	48.754	48.1587	19.3005	21.716	20.2346	19.4678	cellular process	biological_process
Hb_000008_410					HDS2	MEP pathway: 4-hydroxy-3-methylbut-2-en-1-yl diphosphate synthase	15.424	11.7744	44.5312	47.9491	15.7067	16.3044	13.9114	12.2462	cellular process	biological_process
Hb_159809_090					HDR1	MEP pathway: 4-hydroxy-3-methylbut-2-enyl diphosphate reductase	43.4741	33.98	113.501	123.383	27.7721	30.4983	36.0836	44.1407	cellular process	biological_process
Hb_000963_090					HDR2	MEP pathway: 4-hydroxy-3-methylbut-2-enyl diphosphate reductase	5.07728	17.896	54.3864	62.0669	27.9401	27.7473	21.8499	22.2336	secondary metabolic process	biological_process
Hb_001842_100					DMAT1	Prenyl-PP biosynthesis: Dimethyallyltransferase	8.79998	8.55587	6.3249	6.71793	6.92366	8.79639	6.85902	7.79962	transferase activity	molecular_function
Hb_000428_050					DMAT2	Prenyl-PP biosynthesis: Dimethyallyltransferase	1.90542	2.71733	4.63452	3.99846	3.64473	3.48216	3.34942	2.61463	nucleobase-containing compound metabolic process	biological_process
Hb_000130_260					DMAT3	Prenyl-PP biosynthesis: Dimethyallyltransferase	1.75767	4.28308	5.36803	4.64896	5.76274	6.20461	4.94278	4.33937	transferase activity	molecular_function
Hb_000072_070					FPPS1	Prenyl-PP biosynthesis: Farnesyl diphosphate synthase	138.518	36.6689	43.819	43.7525	42.5673	38.437	47.7752	58.3864	transferase activity	molecular_function
Hb_100414_010					FPPS2	Prenyl-PP biosynthesis: Farnesyl diphosphate synthase	41.8305	0.387081	0.252883	0.284865	0.980879	0.907788	0.786285	0.512253	transferase activity	molecular_function
Hb_011224_160					FPPS3	Prenyl-PP biosynthesis: Farnesyl diphosphate synthase	2.13621	14.8916	20.4311	20.535	14.5274	14.1732	18.8983	17.1401	transferase activity	molecular_function
Hb_115919_020					GGPPS1	Prenyl-PP biosynthesis: Geranyl geranyl diphosphate synthase	174.059	1.69789	1.2421	0.985498	3.4043	3.16919	1.9321	1.8449	transferase activity	molecular_function
Hb_001948_040					GGPPS10	Prenyl-PP biosynthesis: Geranyl geranyl diphosphate synthase	0	0	9.78114	10.1608	0.548755	1.54458	0.205063	0.503453	transferase activity	molecular_function
Hb_000371_100					GGPPS2	Prenyl-PP biosynthesis: Geranyl geranyl diphosphate synthase	82.3059	27.8913	22.5145	21.1299	21.4081	17.9065	26.2831	19.2488	transferase activity	molecular_function
Hb_134789_010					GGPPS3	Prenyl-PP biosynthesis: Geranyl geranyl diphosphate synthase	178.406	1.14296	1.16682	0.903386	3.3956	2.80627	1.27674	0	transferase activity	molecular_function
Hb_020367_050					GGPPS4	Prenyl-PP biosynthesis: Geranyl geranyl diphosphate synthase	38.331	17.2842	24.1967	24.116	22.4705	20.1176	19.7006	17.6143	cellular process	biological_process
Hb_000114_150					GGPPS5	Prenyl-PP biosynthesis: Geranyl geranyl diphosphate synthase	23.4488	29.2903	25.1399	25.4802	25.4905	25.3222	20.205	23.4658	transferase activity	molecular_function
Hb_002768_080					GGPPS6	Prenyl-PP biosynthesis: Geranyl geranyl diphosphate synthase	4.92296	0	0	0.0375407	0.0455747	0	0	0	transferase activity	molecular_function
Hb_000009_180					GGPPS7	Prenyl-PP biosynthesis: Geranyl geranyl diphosphate synthase	0.464388	0.927197	1.52686	1.37002	0.833055	1.10397	0.580311	1.12662	transferase activity	molecular_function
Hb_010672_040	*	*	*	*	GGPPS8	Prenyl-PP biosynthesis: Geranyl geranyl diphosphate synthase	0	0	0.0406673	0	0	0	0	0	transferase activity	molecular_function
Hb_009780_060					GGPPS9	Prenyl-PP biosynthesis: Geranyl geranyl diphosphate synthase	0	0.808233	65.3695	77.6446	10.8971	15.6317	2.44331	2.25264	transferase activity	molecular_function
Hb_005686_130					IPPI1	Prenyl-PP biosynthesis: Isopentenyl-diphosphate delta isomerase	6.3346	64.6315	61.4899	65.584	54.5093	54.2008	60.9014	65.1019	hydrolase activity	molecular_function
Hb_000608_190					IPPI2	Prenyl-PP biosynthesis: Isopentenyl-diphosphate delta isomerase	0.0302244	8.20801	23.6238	28.6154	8.76196	8.06711	10.0592	11.7075	catalytic activity	molecular_function
Hb_000548_040					CPT1	cis-prenyltransferase	1212.64	0	0	0	0	0	0	0	transferase activity	molecular_function
Hb_006070_010					CPT2	cis-prenyltransferase	637.893	0	0	0	0.0951333	0	0	0	transferase activity	molecular_function
Hb_000313_080					CPT3	cis-prenyltransferase	2.58626	0.0664437	0.080725	0.12146	0.234742	0.042258	0.756543	0.35998	transferase activity	molecular_function
Hb_000313_100					CPT4	cis-prenyltransferase	0	0.150566	0.122862	0.247413	0.431354	0.266633	0.942804	0.431737	transferase activity	molecular_function
Hb_000548_030					CPT5	cis-prenyltransferase	145.554	0	0	0	0	0	0	0	transferase activity	molecular_function
Hb_000120_870					CPT6	cis-prenyltransferase	0	0.59647	7.25792	6.70004	4.68136	5.58703	0.678697	1.43874
Hb_001999_050					CPT7	cis-prenyltransferase	0.0237995	0.521578	0.540209	0.570054	0.971796	0.561954	0.964267	0.351022	transferase activity	molecular_function
Hb_004659_120	*				CPTL	cis-prenyltransferase like, Nogo-B receptor like	1059.32	36.4792	34.5396	35.2885	44.5803	46.6953	34.8164	36.6895	transferase activity	molecular_function
Hb_111648_010					REF1	Rubber elongation factor	4045.64	0.222901	0.286797	0.180235	0.216609	0	0.357363	0	translation factor activity, RNA binding	molecular_function
Hb_149683_010					REF2	Rubber elongation factor	38196	274.249	255.126	254.066	199.106	202.055	465.522	570.932	translation factor activity, RNA binding	molecular_function
Hb_001741_040			*	*	REF3	Rubber elongation factor	2213.01	5.7036	4.69703	3.38012	3.59033	4.01604	9.41259	11.84	translation factor activity, RNA binding	molecular_function
Hb_000345_040					REF4	Rubber elongation factor	109.93	0	0	0	0	0	0	0
Hb_152868_010					REF5	Rubber elongation factor	0.173424	2.24266	3.42174	4.48646	6.17082	5.75725	11.2175	4.13548	translation factor activity, RNA binding	molecular_function
Hb_001741_100					REF6	Rubber elongation factor	555.937	0.0797176	0.0824824	0.0672606	0.364986	0.317981	0	0.152608
Hb_001741_110	*				REF7	Rubber elongation factor	128.81	0.243534	0.263825	0.224533	0.572756	1.55362	0	0.866225
Hb_001741_080					REF8	Rubber elongation factor	11542.4	14.4107	5.0766	5.2996	3.79389	4.34059	7.27352	8.01446	cytoplasm	cellular_component
Hb_001741_030	*	*	*	*	REF9	Rubber elongation factor	0	0	0	0	0	0	0	0
Hb_001741_090			*	*	SRPP1	Small rubber particle protein	6452.87	34.6952	27.5965	32.2081	11.9167	12.8195	11.7075	16.2629	cytoplasm	cellular_component
Hb_000617_260					SRPP2	Small rubber particle protein	153.691	180.81	251.684	212.015	96.8418	91.4946	253.642	275.274	response to endogenous stimulus	biological_process
Hb_024714_090			*	*	SRPP3	Small rubber particle protein	0.23011	2.96679	4.16338	3.0461	4.60555	5.5239	3.68132	4.66816
Hb_002078_240					SRPP4	Small rubber particle protein	1.17181	196.689	78.579	71.1387	141.165	143.817	163.862	184.771
Hb_000635_200			*	*	SRPP5	Small rubber particle protein	23.9006	64.2538	16.772	16.8401	44.0036	43.1329	49.0842	56.675
Hb_000345_070					SRPP6	Small rubber particle protein	0.108479	0	0	0	0	0	0	0
Hb_001741_070					SRPP7	Small rubber particle protein	0.701124	0	0	0	0	0	0	0
Hb_002016_040					SRPP8	Small rubber particle protein	0.193215	0.119951	0	0.0983363	0.058311	0.159356	0	0
# Gene IDs are registerd at RIKEN rubber database (http://rubber.riken.jp)

## Sheet: Table S4
Table S4. TFs included in DEGs.
Upregulated genes at 4 h after MeJA treatment						Downregulated genes at 4 h after MeJA treatment						Upregulated genes at 24 h after MeJA treatment						Downregulated genes at 24 h after MeJA treatment						Upregulated genes at 5 d after MeJA treatment						Downregulated genes at 5 d after MeJA treatment
TF family	Number of all genes	Number of upregulated TF genes	MYC2-1 binding	MYC2-2 binding		TF family	Number of all genes	Number of downregulated TF genes	MYC2-1 binding	MYC2-2 binding		TF family	Number of all genes	Number of upregulated TF genes	MYC2-1	MYC2-2		TF family	Number of all genes	Number of upregulated TF genes	MYC2-1	MYC2-2		TF family	Number of all genes	Upregulated TF genes	MYC2-1	MYC2-2		TF family	Number of all genes	Number of downregulated TF genes	MYC2-1	MYC2-2
WRKY	112	3	0	0		SNF2	42	1	0	0		ARR-B	16	1	0	0		bZIP	87	1	0	0		bZIP	87	1	0	0		GRAS	82	2	0	0
SBP	29	1	0	0		C2C2-GATA	41	2	1	1		C3H	91	1	0	0		C2C2-Dof	49	1	0	0		zf-HD	27	1	0	0		C3H	91	1	0	0
ERF	181	1	0	0		NAC	175	1	0	0		ERF	181	3	1	1		OFP	23	1	0	0		NAC	175	1	0	0		C2H2	173	1	0	0
NAC	175	1	1	1		M-type	63	1	0	0		C2H2	173	2	0	0		ERF	181	2	0	0		C2C2-Dof	49	1	0	0		zf-HD	27	1	0	0
bHLH	158	1	0	0		MYB	202	1	0	0		HB	120	1	0	0		M-type	63	2	1	1		C2H2	173	1	0	0		ERF	181	1	0	0
C2C2-Dof	49	1	0	0		ERF	181	3	0	0		WRKY	112	2	1	0		IWS1	28	1	0	0		GRAS	82	1	0	0		TCP	35	2	0	0
IWS1	28	1	0	0		ARID	15	1	0	0		MYB	202	7	1	1		C2H2	173	1	0	0		total	593	6	0	0		SET	53	1	0	0
C2C2-CO-like	10	1	0	0		Orphans	84	1	0	0		Tify	24	1	1	1		total	604	9	1	1								SBP	29	1	0	0
SET	53	1	0	0		C2H2	173	2	0	0		LFY	2	1	0	0														mTERF	74	1	0	0
G2-like	53	1	0	0		AUX/IAA	42	2	0	0		bHLH	158	2	0	0														C2C2-GATA	41	1	0	0
MYB	202	1	0	0		MIKC	40	1	0	0		PHD	57	1	0	0														total	786	12	0	0
LOB	63	1	0	0		zf-HD	27	1	0	0		MYB-related	99	1	1	1
B3	79	1	0	0		LOB	63	1	0	0		total	1235	23	5	4
total	1192	15	1	1		GNAT	45	1	0	0
						total	1193	19	1	1

## Sheet: Table S5
Table S5. List of candidate genes targeted by each TF.
MYC2-1	MYC2-2	bHLH1	bHLH2
Hb_002374_360	Hb_003750_010	Hb_011515_020	Hb_011515_020
Hb_025921_020	Hb_025921_020	Hb_001923_030	Hb_001923_030
Hb_003750_010	Hb_000803_040	Hb_001674_050	Hb_034168_070
Hb_000891_030	Hb_001104_290	Hb_001500_120	Hb_001674_050
Hb_001104_290	Hb_002592_080	Hb_005709_010	Hb_000085_250
Hb_003117_040	Hb_041813_030	Hb_024324_010	Hb_001367_010
Hb_007290_030	Hb_009268_210	Hb_001269_550	Hb_002870_020
Hb_008066_030	Hb_009268_200	Hb_001367_010	Hb_015386_050
Hb_000567_090	Hb_001375_010	Hb_000220_100	Hb_000220_100
Hb_000803_040	Hb_009268_150	Hb_000345_530	Hb_000742_180
Hb_001846_030	Hb_000728_050	Hb_000007_330	Hb_002060_010
Hb_004899_330	Hb_003144_010	Hb_000075_010	Hb_001500_120
Hb_000479_070	Hb_007290_030	Hb_007821_010	Hb_000327_230
Hb_006483_050	Hb_000891_030	Hb_023278_030	Hb_000563_420
Hb_000975_150	Hb_001707_010	Hb_001053_070	Hb_005709_010
Hb_000975_140	Hb_000088_130	Hb_000866_200	Hb_020178_020
Hb_000483_050	Hb_019025_010	Hb_000457_050	Hb_023278_030
Hb_023732_040	Hb_023582_040	Hb_000563_420	Hb_008179_020
Hb_024714_060	Hb_005037_020	Hb_020178_020	Hb_028912_050
Hb_004297_050	Hb_002374_360	Hb_029631_010	Hb_003688_020
Hb_009421_070	Hb_004297_050	Hb_000164_150	Hb_001627_040
Hb_005142_010	Hb_000479_070	Hb_001864_050	Hb_000866_200
Hb_006332_030	Hb_000856_330	Hb_000085_250	Hb_010422_010
Hb_008695_210	Hb_006668_020	Hb_001366_220	Hb_027445_010
Hb_000997_130	Hb_034468_030	Hb_007263_010	Hb_000551_020
Hb_002221_010	Hb_008205_010	Hb_000327_230	Hb_017739_010
Hb_002253_060	Hb_006360_010	Hb_000505_010	Hb_006746_010
Hb_010361_040	Hb_009268_100	Hb_028900_020	Hb_032717_080
Hb_001143_090	Hb_000586_040	Hb_000111_410	Hb_000723_290
Hb_001195_220	Hb_000285_120	Hb_001911_040	Hb_008507_050
Hb_002127_010	Hb_001338_100	Hb_003670_020	Hb_004542_010
Hb_004551_010	Hb_011616_060	Hb_034168_070	Hb_001607_010
Hb_005348_090	Hb_004116_170	Hb_010337_030	Hb_000260_180
Hb_005710_020	Hb_006197_010	Hb_003225_040	Hb_000039_160
Hb_005739_010	Hb_002221_010	Hb_032717_080	Hb_019187_020
Hb_000678_010	Hb_015796_010	Hb_000455_090	Hb_008771_040
Hb_010422_070	Hb_001999_210	Hb_005144_140	Hb_041813_070
Hb_004116_170	Hb_024714_060	Hb_005499_010	Hb_001269_550
Hb_002592_080	Hb_000030_300	Hb_027445_010	Hb_000175_050
Hb_003144_010	Hb_005142_010	Hb_005542_080	Hb_003376_380
Hb_000318_490	Hb_005233_050	Hb_005007_010	Hb_000457_050
Hb_004563_010	Hb_005348_090	Hb_000735_180	Hb_000007_330
Hb_007477_080	Hb_006483_050	Hb_000964_160	Hb_007281_010
Hb_004724_310	Hb_007248_030	Hb_001898_040	Hb_027892_010
Hb_001999_210	Hb_001033_020	Hb_017739_010	Hb_002026_040
Hb_002295_040	Hb_014924_010	Hb_000260_180	Hb_001911_040
Hb_025052_010	Hb_004899_330	Hb_003183_020	Hb_000091_060
Hb_003897_020	Hb_044846_010	Hb_003952_040	Hb_029631_010
Hb_004791_010	Hb_002039_010	Hb_000345_020	Hb_001053_070
Hb_048476_110	Hb_002387_020	Hb_001627_040	Hb_000008_300
Hb_005539_340	Hb_027472_010	Hb_000169_030	Hb_000964_160
Hb_005539_350	Hb_027472_020	Hb_001797_010	Hb_003952_040
Hb_007248_030	Hb_003641_030	Hb_000208_280	Hb_001352_080
Hb_002108_010	Hb_000483_050	Hb_000392_140	Hb_001412_050
Hb_002498_260	Hb_000649_300	Hb_004816_020	Hb_000208_280
Hb_006197_010	Hb_000452_120	Hb_005701_110	Hb_002311_320
Hb_000649_300	Hb_002637_020	Hb_007002_040	Hb_024570_010
Hb_000836_290	Hb_000250_030	Hb_007811_040	Hb_000358_250
Hb_001188_030	Hb_012560_010	Hb_008507_050	Hb_000416_130
Hb_003071_040	Hb_010261_050	Hb_000866_250	Hb_000483_390
Hb_003952_120	Hb_000103_540	Hb_019496_010	Hb_005701_110
Hb_001033_020	Hb_010361_040	Hb_028912_050	Hb_001008_090
Hb_000327_240	Hb_001089_040	Hb_003185_010	Hb_009268_210
Hb_004586_180	Hb_001123_190	Hb_014104_020	Hb_005054_050
Hb_015047_020	Hb_012402_010	Hb_002060_010	Hb_011861_130
Hb_006668_020	Hb_001511_250	Hb_000039_160	Hb_003304_080
Hb_001511_250	Hb_001678_010	Hb_005048_010	Hb_003183_020
Hb_002078_430	Hb_002078_430	Hb_020712_030	Hb_002299_050
Hb_003304_040	Hb_002127_010	Hb_002299_050	Hb_000589_110
Hb_005233_050	Hb_023732_040	Hb_000258_050	Hb_000661_100
Hb_000072_010	Hb_025052_010	Hb_003540_030	Hb_007111_040
Hb_001716_020	Hb_000270_720	Hb_003609_040	Hb_004117_270
Hb_009548_020	Hb_000270_730	Hb_039777_010	Hb_001782_110
Hb_010334_030	Hb_003897_020	Hb_000589_110	Hb_000258_330
Hb_000025_490	Hb_000429_100	Hb_006422_030	Hb_000260_780
Hb_000088_130	Hb_004408_030	Hb_006501_050	Hb_008225_090
Hb_002107_160	Hb_004551_010	Hb_000586_040	Hb_001221_250
Hb_000276_020	Hb_000487_230	Hb_022574_010	Hb_018790_020
Hb_002151_130	Hb_005843_120	Hb_005142_010	Hb_001902_140
Hb_011918_030	Hb_006332_030	Hb_005596_030	Hb_000358_220
Hb_002542_030	Hb_000678_010	Hb_015109_010	Hb_004102_070
Hb_000032_200	Hb_000072_010	Hb_042463_050	Hb_000455_090
Hb_004724_320	Hb_007477_080	Hb_001607_010	Hb_005710_020
Hb_006538_080	Hb_007982_040	Hb_006746_010	Hb_000075_010
Hb_000976_330	Hb_000997_130	Hb_008179_020	Hb_009083_030
Hb_004635_030	Hb_007911_010	Hb_000012_120	Hb_002124_020
Hb_001367_010	Hb_003445_040	Hb_012199_020	Hb_000291_010
Hb_001391_050	Hb_042336_010	Hb_025240_010	Hb_004888_020
Hb_002659_020	Hb_002523_010	Hb_001018_080	Hb_001083_040
Hb_000429_100	Hb_004635_030	Hb_000139_330	Hb_042463_050
Hb_000465_150	Hb_002251_070	Hb_001437_010	Hb_002092_020
Hb_000465_230	Hb_010705_020	Hb_000175_050	Hb_000258_050
Hb_000487_230	Hb_001214_190	Hb_000175_520	Hb_003609_040
Hb_000510_010	Hb_002107_160	Hb_001856_020	Hb_000586_040
Hb_000684_350	Hb_000276_020	Hb_001902_140	Hb_019441_010
Hb_000805_280	Hb_000417_060	Hb_000197_300	Hb_015109_010
Hb_001951_110	Hb_008493_010	Hb_002193_010	Hb_000099_200
Hb_001707_010	Hb_001105_130	Hb_002536_010	Hb_007263_010
Hb_000417_060	Hb_011918_030	Hb_028816_010	Hb_003185_010
Hb_007821_030	Hb_017308_010	Hb_000030_290	Hb_000152_550
Hb_000092_160	Hb_004046_010	Hb_003376_380	Hb_028900_020
Hb_004033_020	Hb_004724_310	Hb_000358_220	Hb_000345_020
Hb_002431_070	Hb_000567_090	Hb_003914_050	Hb_001018_080
Hb_001089_040	Hb_000608_110	Hb_003922_010	Hb_000139_330
Hb_001123_190	Hb_008679_020	Hb_004223_280	Hb_001408_030
Hb_011716_140	Hb_002253_060	Hb_004478_050	Hb_014497_080
Hb_001279_170	Hb_000444_030	Hb_005710_020	Hb_001473_140
Hb_001678_010	Hb_007329_070	Hb_000576_040	Hb_000197_300
Hb_000270_720	Hb_007497_010	Hb_006787_040	Hb_002016_180
Hb_000270_730	Hb_030636_010	Hb_007281_010	Hb_024324_010
Hb_000030_300	Hb_004804_010	Hb_007632_030	Hb_000030_290
Hb_000455_090	Hb_031194_020	Hb_000836_130	Hb_003225_040
Hb_000856_330	Hb_001653_030	Hb_000905_030	Hb_003581_130
Hb_000993_040	Hb_001602_020	Hb_009083_030	Hb_004097_120
Hb_006271_010	Hb_000365_020	Hb_005585_030	Hb_000487_190
Hb_007809_090	Hb_008277_030	Hb_002814_130	Hb_000495_050
Hb_000365_020	Hb_000100_060	Hb_003914_040	Hb_000505_010
Hb_005043_010	Hb_001143_090	Hb_000661_040	Hb_005144_140
Hb_000430_020	Hb_001157_210	Hb_019040_010	Hb_005291_040
Hb_013546_030	Hb_012617_030	Hb_002400_050	Hb_005499_010
Hb_001511_070	Hb_012627_070	Hb_000450_070	Hb_000613_020
Hb_002929_060	Hb_001279_170	Hb_000260_780	Hb_000622_050
Hb_004899_010	Hb_001367_010	Hb_047843_010	Hb_006787_040
Hb_005037_020	Hb_001405_090	Hb_001352_080	Hb_000684_350
Hb_000608_110	Hb_001524_120	Hb_007760_030	Hb_007002_040
Hb_001001_020	Hb_001638_330	Hb_005399_050	Hb_000925_140
Hb_000291_050	Hb_001862_160	Hb_019441_010	Hb_002272_140
Hb_009268_150	Hb_001879_010	Hb_002026_040	Hb_034561_030
Hb_001638_330	Hb_020665_030	Hb_002272_140	Hb_010407_010
Hb_001776_160	Hb_002295_040	Hb_008803_040	Hb_001009_050
Hb_001862_160	Hb_002471_300	Hb_000120_390	Hb_002260_090
Hb_000198_010	Hb_002659_020	Hb_002849_160	Hb_000046_050
Hb_026764_010	Hb_026764_010	Hb_019187_020	Hb_000462_130
Hb_029584_140	Hb_000307_230	Hb_004888_020	Hb_000645_160
Hb_029584_130	Hb_003117_040	Hb_000091_060	Hb_000656_210
Hb_000316_110	Hb_000316_110	Hb_023230_020	Hb_000735_180
Hb_003939_060	Hb_000318_490	Hb_001322_130	Hb_000106_090
Hb_004108_120	Hb_003304_040	Hb_001356_020	Hb_002400_050
Hb_006787_040	Hb_004108_120	Hb_001619_030	Hb_000327_180
Hb_000692_230	Hb_000413_010	Hb_002260_090	Hb_005048_010
Hb_005054_050	Hb_000042_030	Hb_023344_160	Hb_005542_080
Hb_005181_180	Hb_000445_240	Hb_000280_090	Hb_000075_110
Hb_008205_010	Hb_004563_010	Hb_000046_050	Hb_000889_030
Hb_000466_060	Hb_004607_020	Hb_004976_080	Hb_000335_030
Hb_000881_060	Hb_000465_150	Hb_005045_060	Hb_000261_140
Hb_012022_130	Hb_000465_230	Hb_005332_140	Hb_000002_280
Hb_024650_020	Hb_004791_010	Hb_000061_420	Hb_004712_220
Hb_001140_320	Hb_048476_110	Hb_000656_210	Hb_005622_020
Hb_005202_040	Hb_000510_230	Hb_000661_100	Hb_000181_440
Hb_007181_080	Hb_005359_010	Hb_006721_030	Hb_000525_010
Hb_000083_090	Hb_005615_070	Hb_000008_300	Hb_001360_010
Hb_000959_380	Hb_005739_010	Hb_008259_010	Hb_022256_040
Hb_004804_010	Hb_007120_010	Hb_008771_040	Hb_010337_030
Hb_001793_050	Hb_007229_040	Hb_000914_070	Hb_001246_110
Hb_010174_130	Hb_007508_080	Hb_011108_010	Hb_001250_080
Hb_012617_030	Hb_007508_070	Hb_011609_180	Hb_015807_010
Hb_023226_010	Hb_008695_210	Hb_000120_460	Hb_000161_050
Hb_002603_100	Hb_000925_060	Hb_001216_060	Hb_021596_080
Hb_002633_020	Hb_009421_070	Hb_012787_050	Hb_000258_450
Hb_003209_020	Hb_000466_060	Hb_001473_140	Hb_002759_230
Hb_032202_200	Hb_000049_030	Hb_015807_010	Hb_000356_090
Hb_004837_080	Hb_005438_020	Hb_001675_170	Hb_003914_050
Hb_000632_070	Hb_008556_020	Hb_001741_090	Hb_003922_010
Hb_007229_040	Hb_011915_020	Hb_002026_130	Hb_000397_170
Hb_000925_060	Hb_023468_010	Hb_002045_130	Hb_004102_020
Hb_000951_010	Hb_002400_160	Hb_002311_320	Hb_005237_070
Hb_009900_020	Hb_024650_020	Hb_028487_050	Hb_000574_130
Hb_001602_020	Hb_001140_320	Hb_002893_080	Hb_000576_040
Hb_023582_040	Hb_013546_030	Hb_029142_090	Hb_006452_050
Hb_000252_070	Hb_000164_180	Hb_002928_110	Hb_000776_040
Hb_000320_190	Hb_001864_050	Hb_000343_250	Hb_008145_010
Hb_003562_050	Hb_002498_260	Hb_003581_130	Hb_000866_250
Hb_005914_090	Hb_000316_100	Hb_003768_020	Hb_009252_100
Hb_008679_020	Hb_003562_050	Hb_000416_130	Hb_000983_100
Hb_009268_210	Hb_037960_010	Hb_000429_240	Hb_001002_040
Hb_009268_200	Hb_000052_020	Hb_000465_300	Hb_001277_040
Hb_047086_010	Hb_000063_120	Hb_000483_390	Hb_001279_190
Hb_011915_020	Hb_006922_060	Hb_000487_190	Hb_001322_130
Hb_003286_020	Hb_008066_030	Hb_000495_050	Hb_001789_060
Hb_000465_330	Hb_033304_010	Hb_000510_350	Hb_028285_020
Hb_005551_020	Hb_006491_010	Hb_005181_140	Hb_003540_030
Hb_000613_150	Hb_002676_050	Hb_005207_030	Hb_005332_140
Hb_014309_010	Hb_010916_010	Hb_006096_040	Hb_005731_040
Hb_027506_060	Hb_001188_030	Hb_000613_020	Hb_006422_030
Hb_009316_050	Hb_001226_030	Hb_000622_050	Hb_007338_030
Hb_007357_060	Hb_001231_070	Hb_006452_050	Hb_011282_050
Hb_000586_040	Hb_000141_200	Hb_000663_020	Hb_004724_010
Hb_017434_030	Hb_001635_190	Hb_007416_040	Hb_001811_030
Hb_000444_030	Hb_017434_030	Hb_007440_010	Hb_001898_040
Hb_005165_020	Hb_007000_010	Hb_008699_030	Hb_002567_030
Hb_010261_050	Hb_012053_060	Hb_000983_100	Hb_000111_410
Hb_010672_040	Hb_041695_010	Hb_004077_030	Hb_001768_030
Hb_000120_270	Hb_002151_130	Hb_000557_030	Hb_000028_580
Hb_001681_050	Hb_000003_660	Hb_000099_200	Hb_028227_010
Hb_023562_020	Hb_000061_430	Hb_002567_030	Hb_028871_020
Hb_029977_010	Hb_003770_020	Hb_000106_090	Hb_003463_010
Hb_000042_030	Hb_001846_030	Hb_001542_020	Hb_006847_040
Hb_004208_030	Hb_002431_070	Hb_000181_180	Hb_007785_010
Hb_000445_240	Hb_000291_050	Hb_024066_020	Hb_000789_090
Hb_000052_020	Hb_005920_030	Hb_005054_050	Hb_004899_080
Hb_006261_060	Hb_006229_020	Hb_000692_070	Hb_000334_290
Hb_007508_080	Hb_006691_060	Hb_000075_110	Hb_000187_110
Hb_007508_070	Hb_001301_170	Hb_007785_010	Hb_009268_220
Hb_000775_020	Hb_001036_050	Hb_008871_010	Hb_000265_010
Hb_009615_130	Hb_010672_040	Hb_003376_220	Hb_000012_120
Hb_000964_030	Hb_000011_370	Hb_004724_010	Hb_001366_220
Hb_005780_010	Hb_001105_110	Hb_001571_100	Hb_002849_160
Hb_007000_010	Hb_000111_390	Hb_000187_110	Hb_007796_040
Hb_009268_100	Hb_000111_380	Hb_026049_010	Hb_005736_120
Hb_000164_180	Hb_001133_020	Hb_034561_030	Hb_000182_070
Hb_017308_010	Hb_011381_080	Hb_011245_010	Hb_000070_160
Hb_003906_110	Hb_011457_100	Hb_001022_030	Hb_001999_290
Hb_004195_050	Hb_011640_020	Hb_003124_010	Hb_008329_040
Hb_000429_140	Hb_011716_140	Hb_001025_150	Hb_009421_100
Hb_005288_150	Hb_001195_220	Hb_000182_070	Hb_012146_050
Hb_005288_160	Hb_012022_130	Hb_000070_160	Hb_013405_110
Hb_000703_060	Hb_001221_460	Hb_006040_030	Hb_001623_060
Hb_010422_010	Hb_001322_070	Hb_011652_010	Hb_001741_040
Hb_001226_030	Hb_001391_050	Hb_011861_130	Hb_006153_080
Hb_000003_660	Hb_001410_050	Hb_022256_040	Hb_012384_050
Hb_000130_380	Hb_001424_090	Hb_008329_040	Hb_022487_010
Hb_029879_080	Hb_001454_180	Hb_009421_100	Hb_002272_260
Hb_006360_010	Hb_001681_050	Hb_000115_320	Hb_002498_210
Hb_001319_020	Hb_017750_010	Hb_013405_110	Hb_039777_010
Hb_001591_010	Hb_001805_010	Hb_001741_040	Hb_004185_040
Hb_027445_010	Hb_000186_090	Hb_000258_330	Hb_004724_090
Hb_041695_010	Hb_001959_040	Hb_000261_140	Hb_000077_420
Hb_044846_010	Hb_000198_010	Hb_007169_010	Hb_000009_110
Hb_000045_150	Hb_002078_210	Hb_001157_030	Hb_001028_060
Hb_027684_020	Hb_002217_110	Hb_001279_190	Hb_011442_030
Hb_001722_120	Hb_022250_160	Hb_001357_200	Hb_000115_050
Hb_001691_060	Hb_002276_090	Hb_000161_050	Hb_011689_080
Hb_012560_010	Hb_023226_010	Hb_001789_060	Hb_000120_460
Hb_001832_070	Hb_002350_090	Hb_002092_020	Hb_001205_060
Hb_000270_160	Hb_002631_070	Hb_002236_020	Hb_012528_050
Hb_000302_140	Hb_002633_020	Hb_002662_100	Hb_012539_080
Hb_000452_120	Hb_002749_060	Hb_002665_030	Hb_001416_060
Hb_027010_010	Hb_002799_110	Hb_030082_040	Hb_001437_010
Hb_000103_540	Hb_029084_010	Hb_003098_060	Hb_001619_090
Hb_001410_050	Hb_000291_220	Hb_003994_260	Hb_001623_330
Hb_002157_050	Hb_029576_060	Hb_005656_100	Hb_016461_030
Hb_023001_040	Hb_029584_140	Hb_005730_070	Hb_001741_090
Hb_000237_210	Hb_029584_130	Hb_005731_040	Hb_001769_160
Hb_002635_010	Hb_002973_080	Hb_000645_160	Hb_001811_150
Hb_002749_060	Hb_029977_010	Hb_000699_010	Hb_019641_030
Hb_028227_030	Hb_003020_180	Hb_007606_010	Hb_019816_020
Hb_000322_100	Hb_000317_390	Hb_000009_110	Hb_002026_130
Hb_000325_010	Hb_003209_020	Hb_009077_020	Hb_000221_160
Hb_000413_010	Hb_032202_200	Hb_000926_030	Hb_002216_060
Hb_004607_020	Hb_003404_010	Hb_009372_020	Hb_002217_010
Hb_000594_090	Hb_000377_140	Hb_006040_010	Hb_002308_050
Hb_000613_020	Hb_003847_090	Hb_001863_480	Hb_002357_020
Hb_007237_090	Hb_003849_220	Hb_010812_140	Hb_002411_040
Hb_007594_040	Hb_003939_060	Hb_001141_250	Hb_002475_070
Hb_000011_370	Hb_000004_030	Hb_012114_060	Hb_002518_160
Hb_001505_030	Hb_004208_030	Hb_012528_050	Hb_002536_010
Hb_002186_190	Hb_004267_060	Hb_000133_060	Hb_002542_130
Hb_002387_020	Hb_004837_080	Hb_013925_010	Hb_025525_010
Hb_002498_100	Hb_048937_030	Hb_001404_070	Hb_002685_120
Hb_000300_390	Hb_000510_010	Hb_001408_030	Hb_002769_020
Hb_003060_030	Hb_005439_010	Hb_001416_060	Hb_002798_050
Hb_004021_010	Hb_000547_020	Hb_001583_010	Hb_028487_050
Hb_000407_040	Hb_005718_010	Hb_016354_010	Hb_028816_010
Hb_004899_110	Hb_005976_040	Hb_001799_100	Hb_002893_080
Hb_050514_020	Hb_006236_010	Hb_000185_130	Hb_029576_090
Hb_005054_180	Hb_000632_070	Hb_001882_190	Hb_002995_020
Hb_006816_370	Hb_000645_260	Hb_019641_030	Hb_003337_050
Hb_006922_060	Hb_000684_260	Hb_019816_020	Hb_033642_050
Hb_009178_070	Hb_000684_250	Hb_001990_020	Hb_000345_530
Hb_000061_430	Hb_000684_350	Hb_002046_200	Hb_000373_160
Hb_004218_080	Hb_000692_230	Hb_002122_050	Hb_000395_010
Hb_000141_250	Hb_006938_050	Hb_021576_030	Hb_004032_440
Hb_002676_050	Hb_007030_020	Hb_021596_080	Hb_000406_030
Hb_010049_030	Hb_007416_360	Hb_021703_010	Hb_004478_050
Hb_001214_190	Hb_007625_010	Hb_002216_060	Hb_004586_130
Hb_002400_160	Hb_000763_020	Hb_002217_010	Hb_004586_430
Hb_002750_050	Hb_007883_010	Hb_022595_020	Hb_000465_300
Hb_000373_290	Hb_000805_280	Hb_000249_110	Hb_004816_020
Hb_041266_010	Hb_000809_040	Hb_000270_610	Hb_000484_130
Hb_000161_140	Hb_000892_070	Hb_027402_120	Hb_000051_140
Hb_008165_030	Hb_000092_120	Hb_002809_030	Hb_005207_030
Hb_008165_040	Hb_000956_010	Hb_029388_010	Hb_005550_070
Hb_001653_030	Hb_009900_020	Hb_029576_090	Hb_005993_050
Hb_003078_050	Hb_015047_020	Hb_003038_020	Hb_006059_020
Hb_011379_010	Hb_001832_070	Hb_003086_070	Hb_000061_480
Hb_001373_090	Hb_010422_070	Hb_031862_110	Hb_006132_070
Hb_002217_200	Hb_001358_080	Hb_000329_540	Hb_000622_090
Hb_002411_080	Hb_001373_090	Hb_003337_050	Hb_000663_020
Hb_000317_390	Hb_002284_300	Hb_033642_050	Hb_000676_060
Hb_000318_150	Hb_002325_060	Hb_003371_040	Hb_006775_090
Hb_003376_120	Hb_002506_010	Hb_004108_200	Hb_006846_160
Hb_003680_070	Hb_000252_070	Hb_004586_430	Hb_000071_130
Hb_005059_020	Hb_029238_040	Hb_048476_060	Hb_007416_040
Hb_007229_060	Hb_003060_030	Hb_004968_060	Hb_007440_010
Hb_000739_130	Hb_000320_190	Hb_005291_040	Hb_000905_030
Hb_000803_220	Hb_003940_010	Hb_005503_020	Hb_000094_070
Hb_000836_450	Hb_004033_020	Hb_005568_130	Hb_009628_020
Hb_001021_130	Hb_044724_010	Hb_000574_130	Hb_009767_080
Hb_001221_460	Hb_004899_010	Hb_005916_030	Hb_000997_060
Hb_012760_040	Hb_004899_110	Hb_006120_080	Hb_019496_010
Hb_001322_070	Hb_005276_030	Hb_006132_040	Hb_011355_040
Hb_001348_230	Hb_006538_080	Hb_006132_110	Hb_010174_070
Hb_017750_010	Hb_007975_060	Hb_000622_090	Hb_014894_010
Hb_001902_180	Hb_008247_010	Hb_006816_290	Hb_000181_180
Hb_020665_030	Hb_000825_020	Hb_006846_160	Hb_019040_010
Hb_002078_210	Hb_000083_090	Hb_000077_140	Hb_001944_020
Hb_002085_050	Hb_000836_450	Hb_000778_010	Hb_024066_020
Hb_000215_220	Hb_009548_020	Hb_008111_020	Hb_000450_070
Hb_000022_190	Hb_010800_020	Hb_008145_010	Hb_000573_150
Hb_022250_160	Hb_010049_030	Hb_000094_070	Hb_000692_070
Hb_022501_020	Hb_001016_080	Hb_009767_080	Hb_000926_120
Hb_002350_090	Hb_001180_040	Hb_000985_070	Hb_002577_010
Hb_002471_300	Hb_024898_030	Hb_010174_070	Hb_003376_220
Hb_002759_050	Hb_002750_050	Hb_001028_080	Hb_013420_030
Hb_002799_110	Hb_002973_070	Hb_001028_070	Hb_003750_010
Hb_003020_180	Hb_029879_080	Hb_011534_020	Hb_013394_050
Hb_003849_220	Hb_003071_050	Hb_001269_390	Hb_025921_020
Hb_004157_050	Hb_003286_020	Hb_014894_010	Hb_041813_040
Hb_004422_020	Hb_044653_050	Hb_015276_010	Hb_000891_030
Hb_005016_130	Hb_004491_030	Hb_001768_030	Hb_000092_160
Hb_005359_010	Hb_004586_180	Hb_000028_580	Hb_041813_080
Hb_005439_010	Hb_004970_200	Hb_028871_020	Hb_002374_360
Hb_000645_260	Hb_005551_020	Hb_003994_100	Hb_005188_060
Hb_006502_090	Hb_000567_050	Hb_000573_150	Hb_003071_050
Hb_006615_050	Hb_000699_020	Hb_012163_050	Hb_000142_020
Hb_006810_030	Hb_007821_030	Hb_008179_010	Hb_007290_030
Hb_007218_080	Hb_000904_090	Hb_000142_020	Hb_008695_210
Hb_000731_210	Hb_000569_020	Hb_000891_030	Hb_001104_290
Hb_007625_010	Hb_025007_010	Hb_025921_020	Hb_006634_010
Hb_000856_100	Hb_014309_010	Hb_001959_040	Hb_041813_010
Hb_000892_070	Hb_000975_150	Hb_004297_050	Hb_002253_060
Hb_000092_120	Hb_000975_140	Hb_007290_030	Hb_002400_160
Hb_011972_010	Hb_013999_030	Hb_008695_210	Hb_001511_200
Hb_003001_020	Hb_000029_050	Hb_007975_060	Hb_023732_040
Hb_000544_110	Hb_000740_150	Hb_002400_160	Hb_000318_490
Hb_005741_030	Hb_000111_430	Hb_003071_050	Hb_005649_090
Hb_005438_020	Hb_012160_030	Hb_002253_060	Hb_007975_060
Hb_000390_150	Hb_003071_040	Hb_029622_100	Hb_001722_120
Hb_005920_030	Hb_003867_020	Hb_012807_080	Hb_009268_150
Hb_006229_020	Hb_003867_030	Hb_002078_430	Hb_002535_010
Hb_001454_360	Hb_000390_250	Hb_023732_040	Hb_000740_150
Hb_000201_080	Hb_004354_010	Hb_002374_360	Hb_012807_080
Hb_023468_010	Hb_000045_150	Hb_002870_020	Hb_001677_040
Hb_002471_040	Hb_005181_180	Hb_007248_030	Hb_021443_090
Hb_002973_070	Hb_000544_110	Hb_001104_290	Hb_004705_080
Hb_031910_030	Hb_007169_010	Hb_003641_030	Hb_001959_040
Hb_004116_040	Hb_000976_330	Hb_000413_190	Hb_001338_100
Hb_004491_030	Hb_001009_060	Hb_010261_050	Hb_011918_030
Hb_005271_070	Hb_001951_110	Hb_011716_140	Hb_000272_010
Hb_007451_030	Hb_000025_490	Hb_001511_200	Hb_019025_010
Hb_007451_020	Hb_000270_160	Hb_000205_120	Hb_004899_330
Hb_008616_070	Hb_005054_050	Hb_000205_110	Hb_001862_160
Hb_000029_050	Hb_000645_010	Hb_002127_010	Hb_000205_120
Hb_001232_200	Hb_008667_030	Hb_024714_110	Hb_000205_110
Hb_001242_180	Hb_000261_530	Hb_002631_180	Hb_002127_010
Hb_012797_010	Hb_041266_010	Hb_000030_300	Hb_009268_100
Hb_002792_040	Hb_010422_010	Hb_003020_180	Hb_029622_100
Hb_033304_010	Hb_011512_160	Hb_003117_040	Hb_009268_120
Hb_004453_140	Hb_001159_180	Hb_000429_100	Hb_003071_040
Hb_008277_030	Hb_001476_100	Hb_004705_080	Hb_007645_050
Hb_007695_030	Hb_001486_270	Hb_005188_060	Hb_001214_190
Hb_000111_170	Hb_005901_010	Hb_000678_010	Hb_001140_320
Hb_007930_020	Hb_000599_010	Hb_011918_030	Hb_002400_040
Hb_007329_070	Hb_000881_060	Hb_001571_030	Hb_000649_300
Hb_000111_430	Hb_000092_160	Hb_003750_010	Hb_001638_330
Hb_000127_100	Hb_007716_020	Hb_011512_160	Hb_018292_010
Hb_002995_040	Hb_001001_020	Hb_000975_150	Hb_001999_210
Hb_004354_010	Hb_001172_050	Hb_000975_140	Hb_000818_120
Hb_000084_240	Hb_001789_160	Hb_001214_190	Hb_015386_030
Hb_003770_020	Hb_001691_060	Hb_013394_050	Hb_002221_010
Hb_010402_010	Hb_006601_010	Hb_000103_540	Hb_001571_030
Hb_011616_060	Hb_000143_040	Hb_001089_040	Hb_000567_090
Hb_012389_010	Hb_000375_300	Hb_001862_160	Hb_000291_050
Hb_001750_030	Hb_010142_030	Hb_000318_490	Hb_041813_030
Hb_017948_010	Hb_010172_070	Hb_000331_330	Hb_027684_010
Hb_001799_040	Hb_010174_130	Hb_003355_010	Hb_002995_040
Hb_002307_310	Hb_001021_130	Hb_004108_120	Hb_004635_030
Hb_002518_280	Hb_001163_040	Hb_000479_070	Hb_001152_040
Hb_000284_040	Hb_011671_390	Hb_000544_090	Hb_011716_140
Hb_000316_100	Hb_000120_250	Hb_006938_050	Hb_024714_110
Hb_037960_010	Hb_001205_280	Hb_001140_320	Hb_000270_720
Hb_003912_030	Hb_012305_060	Hb_004046_010	Hb_000270_730
Hb_004631_210	Hb_012595_020	Hb_005276_030	Hb_000331_330
Hb_000614_330	Hb_001366_390	Hb_000649_300	Hb_003355_010
Hb_007338_030	Hb_000142_020	Hb_027684_010	Hb_003656_140
Hb_000771_050	Hb_001507_010	Hb_002221_010	Hb_036790_020
Hb_009524_020	Hb_000152_790	Hb_000092_160	Hb_003939_060
Hb_001301_170	Hb_001546_040	Hb_002107_160	Hb_004297_050
Hb_000645_010	Hb_001546_050	Hb_003286_020	Hb_000479_070
Hb_000100_060	Hb_001673_030	Hb_000340_300	Hb_004837_180
Hb_010172_070	Hb_001779_050	Hb_004970_200	Hb_000487_230
Hb_001053_160	Hb_001790_080	Hb_006615_230	Hb_007248_030
Hb_000120_250	Hb_001811_150	Hb_000466_060	Hb_007625_010
Hb_001424_090	Hb_001811_140	Hb_004899_330	Hb_001789_110
Hb_001507_010	Hb_001902_180	Hb_000740_150	Hb_031194_020
Hb_001524_120	Hb_001975_130	Hb_005181_180	Hb_011512_160
Hb_001541_090	Hb_000198_070	Hb_010422_070	Hb_003641_030
Hb_001892_120	Hb_002081_170	Hb_013405_200	Hb_004631_210
Hb_002045_160	Hb_002085_050	Hb_001716_020	Hb_004899_110
Hb_021396_030	Hb_021396_030	Hb_002498_260	Hb_000525_020
Hb_002188_140	Hb_002157_050	Hb_003071_040	Hb_008707_020
Hb_002290_040	Hb_021596_070	Hb_004631_210	Hb_000413_190
Hb_024590_010	Hb_000022_190	Hb_005288_150	Hb_005399_050
Hb_000258_450	Hb_002263_050	Hb_005288_160	Hb_002056_030
Hb_029622_010	Hb_002281_020	Hb_000567_090	Hb_000975_150
Hb_002973_080	Hb_023001_040	Hb_006197_010	Hb_000975_140
Hb_003020_080	Hb_002307_290	Hb_000866_210	Hb_002311_360
Hb_034013_020	Hb_002311_220	Hb_010142_030	Hb_000270_160
Hb_003659_010	Hb_023562_020	Hb_011381_080	Hb_010172_070
Hb_000366_110	Hb_000249_080	Hb_001152_040	Hb_010261_050
Hb_000366_100	Hb_025592_030	Hb_001524_120	Hb_001143_090
Hb_003929_280	Hb_000258_450	Hb_001638_330	Hb_001524_120
Hb_000417_380	Hb_002603_160	Hb_000270_720	Hb_000030_300
Hb_004208_120	Hb_002635_010	Hb_000270_730	Hb_003020_180
Hb_004267_060	Hb_027406_030	Hb_002740_170	Hb_032202_200
Hb_000046_490	Hb_000028_200	Hb_032202_200	Hb_000429_100
Hb_000510_230	Hb_028227_030	Hb_003656_140	Hb_004837_100
Hb_005916_030	Hb_000286_230	Hb_000368_120	Hb_004987_070
Hb_000663_020	Hb_002890_140	Hb_003939_060	Hb_010422_070
Hb_007185_050	Hb_029622_010	Hb_048476_110	Hb_004046_010
Hb_007416_360	Hb_003055_060	Hb_000487_230	Hb_000327_140
Hb_007441_210	Hb_003056_020	Hb_004987_070	Hb_000466_060
Hb_007474_010	Hb_031527_050	Hb_005348_090	Hb_000201_080
Hb_000763_020	Hb_003212_020	Hb_005649_090	Hb_003286_020
Hb_000784_040	Hb_000325_010	Hb_000684_350	Hb_000340_300
Hb_007982_040	Hb_032660_030	Hb_008066_030	Hb_044653_050
Hb_000089_180	Hb_000329_530	Hb_000808_210	Hb_001252_170
Hb_009421_090	Hb_033124_020	Hb_000818_120	Hb_000045_150
Hb_000500_310	Hb_033152_050	Hb_000997_130	Hb_001104_030
Hb_019025_010	Hb_003355_010	Hb_000692_210	Hb_001104_040
Hb_004308_010	Hb_034013_020	Hb_003053_070	Hb_001231_070
Hb_000728_050	Hb_003449_040	Hb_001488_280	Hb_005496_180
Hb_002400_070	Hb_003642_080	Hb_001722_120	Hb_010142_030
Hb_003445_040	Hb_000366_110	Hb_004635_030	Hb_000103_540
Hb_000692_210	Hb_000366_100	Hb_001059_120	Hb_002281_020
Hb_001638_020	Hb_003673_060	Hb_000272_010	Hb_023001_010
Hb_024898_030	Hb_036790_020	Hb_004724_310	Hb_002799_110
Hb_002686_030	Hb_003891_060	Hb_004899_010	Hb_029622_010
Hb_000684_180	Hb_003929_280	Hb_004899_110	Hb_003117_040
Hb_000375_300	Hb_004007_040	Hb_000976_330	Hb_003207_230
Hb_041813_030	Hb_004032_470	Hb_002908_050	Hb_000368_120
Hb_012160_030	Hb_004041_100	Hb_001226_030	Hb_007982_040
Hb_000206_100	Hb_004116_140	Hb_005455_110	Hb_000976_090
Hb_003023_050	Hb_000417_380	Hb_010672_040	Hb_001105_130
Hb_034594_010	Hb_000419_060	Hb_001105_110	Hb_001500_060
Hb_002251_070	Hb_004324_050	Hb_001123_190	Hb_001716_020
Hb_004156_090	Hb_004555_010	Hb_001163_040	Hb_001864_050
Hb_006364_010	Hb_000046_350	Hb_012305_060	Hb_002498_260
Hb_000820_020	Hb_046117_040	Hb_012325_020	Hb_004116_170
Hb_001009_060	Hb_000465_240	Hb_012402_010	Hb_000483_050
Hb_011173_040	Hb_000047_020	Hb_012627_070	Hb_004899_010
Hb_001351_080	Hb_000048_050	Hb_001405_090	Hb_005276_030
Hb_001635_190	Hb_004837_180	Hb_001677_040	Hb_000866_210
Hb_002411_140	Hb_005016_130	Hb_019654_060	Hb_001338_140
Hb_000742_140	Hb_005048_130	Hb_001999_210	Hb_001488_280
Hb_007479_050	Hb_000510_190	Hb_002000_100	Hb_006615_230
Hb_000987_170	Hb_005188_060	Hb_002045_030	Hb_001846_030
Hb_001133_040	Hb_000522_090	Hb_021443_090	Hb_004429_080
Hb_000012_460	Hb_005488_130	Hb_002281_020	Hb_000049_030
Hb_012423_030	Hb_005539_340	Hb_002486_060	Hb_000692_210
Hb_013405_200	Hb_005539_350	Hb_002571_110	Hb_006667_010
Hb_001832_240	Hb_005701_110	Hb_002659_020	Hb_013420_060
Hb_002173_060	Hb_005767_040	Hb_029243_020	Hb_010872_070
Hb_002284_300	Hb_006106_020	Hb_003144_010	Hb_000248_100
Hb_002744_010	Hb_000648_110	Hb_000039_170	Hb_003430_070
Hb_002864_010	Hb_006501_010	Hb_000417_380	Hb_003633_140
Hb_029904_040	Hb_006502_060	Hb_000042_030	Hb_003994_270
Hb_033594_030	Hb_006502_090	Hb_004837_180	Hb_004724_310
Hb_000347_160	Hb_006533_020	Hb_005539_140	Hb_004102_150
Hb_000380_110	Hb_006776_010	Hb_006332_030	Hb_000138_010
Hb_004176_100	Hb_006787_040	Hb_006483_050	Hb_010812_030
Hb_004907_080	Hb_006788_160	Hb_000684_260	Hb_001089_040
Hb_000005_040	Hb_006810_030	Hb_000684_250	Hb_001140_300
Hb_000567_050	Hb_007102_010	Hb_007625_010	Hb_012194_030
Hb_005976_040	Hb_007123_010	Hb_008768_020	Hb_000193_290
Hb_000668_110	Hb_007441_210	Hb_000956_010	Hb_000193_280
Hb_007210_010	Hb_007594_040	Hb_001846_030	Hb_002000_100
Hb_007975_060	Hb_000775_020	Hb_000205_130	Hb_002045_030
Hb_000825_020	Hb_000784_040	Hb_000049_030	Hb_002078_430
Hb_000840_040	Hb_007845_030	Hb_005063_060	Hb_023771_020
Hb_001252_170	Hb_000796_190	Hb_006667_010	Hb_002486_060
Hb_001277_270	Hb_000818_120	Hb_001552_090	Hb_002631_180
Hb_000809_230	Hb_000856_100	Hb_024650_020	Hb_002740_170
Hb_001486_270	Hb_000089_180	Hb_000417_060	Hb_003020_300
Hb_005901_010	Hb_000934_180	Hb_044653_050	Hb_003212_030
Hb_007163_110	Hb_009421_090	Hb_001104_150	Hb_003897_020
Hb_000008_390	Hb_009444_010	Hb_000390_250	Hb_000039_170
Hb_001030_040	Hb_000951_010	Hb_004102_150	Hb_004108_120
Hb_000011_170	Hb_000993_040	Hb_041813_030	Hb_046117_040
Hb_011381_080	Hb_001013_020	Hb_000029_050	Hb_005348_090
Hb_001157_210	Hb_001025_160	Hb_002092_070	Hb_005539_140
Hb_001163_040	Hb_010402_010	Hb_002910_010	Hb_000645_260
Hb_011671_390	Hb_001080_100	Hb_003060_030	Hb_006788_140
Hb_012402_010	Hb_011972_010	Hb_000347_160	Hb_000684_260
Hb_012595_020	Hb_001571_030	Hb_003633_140	Hb_000684_250
Hb_001268_150	Hb_017330_010	Hb_000483_050	Hb_006938_050
Hb_001269_460	Hb_000175_130	Hb_000005_160	Hb_008066_030
Hb_001295_070	Hb_000205_130	Hb_000742_180	Hb_000836_130
Hb_000140_200	Hb_002092_070	Hb_001104_030	Hb_008768_020
Hb_014700_030	Hb_021443_040	Hb_001104_040	Hb_000926_200
Hb_001673_030	Hb_002186_190	Hb_010422_010	Hb_009900_020
Hb_001754_150	Hb_022132_040	Hb_000365_020	Hb_001552_090
Hb_018292_010	Hb_002307_310	Hb_007163_110	Hb_002149_010
Hb_000186_090	Hb_002510_060	Hb_009476_070	Hb_002151_010
Hb_001879_010	Hb_002521_030	Hb_003464_080	Hb_002686_030
Hb_000198_070	Hb_002542_030	Hb_002056_030	Hb_002900_140
Hb_002411_120	Hb_002744_010	Hb_000100_060	Hb_003053_070
Hb_002659_040	Hb_002929_060	Hb_010172_070	Hb_000803_040
Hb_002849_140	Hb_000300_390	Hb_011310_030	Hb_001916_150
Hb_002890_140	Hb_033594_030	Hb_001140_300	Hb_002298_040
Hb_000291_220	Hb_000347_280	Hb_011457_150	Hb_004645_040
Hb_003010_030	Hb_035360_020	Hb_001287_040	Hb_000390_250
Hb_003010_040	Hb_003906_110	Hb_001391_050	Hb_000976_330
Hb_003018_190	Hb_003994_270	Hb_000140_200	Hb_001013_020
Hb_003055_060	Hb_004021_010	Hb_001433_140	Hb_010368_080
Hb_031527_090	Hb_000429_140	Hb_001546_040	Hb_013405_200
Hb_003206_090	Hb_004680_060	Hb_001546_050	Hb_002092_070
Hb_000329_080	Hb_000471_080	Hb_001790_080	Hb_002675_040
Hb_003404_010	Hb_004880_030	Hb_018292_010	Hb_000347_160
Hb_003768_030	Hb_005059_020	Hb_023001_010	Hb_000005_160
Hb_003784_040	Hb_005081_060	Hb_002311_370	Hb_005288_150
Hb_003847_090	Hb_005288_150	Hb_023771_020	Hb_005288_160
Hb_003927_060	Hb_005288_160	Hb_002477_120	Hb_000056_090
Hb_000004_030	Hb_000061_330	Hb_002631_070	Hb_000640_170
Hb_004041_100	Hb_006848_010	Hb_002749_060	Hb_041813_060
Hb_000046_350	Hb_000703_060	Hb_002799_110	Hb_000115_360
Hb_004987_070	Hb_007047_010	Hb_029576_060	Hb_001226_030
Hb_000510_190	Hb_000707_100	Hb_029622_010	Hb_000365_020
Hb_000522_090	Hb_007181_080	Hb_003020_300	Hb_005455_110
Hb_005615_070	Hb_007210_010	Hb_003304_040	Hb_009476_070
Hb_000613_170	Hb_007333_020	Hb_000336_280	Hb_000103_200
Hb_006236_010	Hb_007338_030	Hb_036790_020	Hb_001141_010
Hb_006502_060	Hb_000739_130	Hb_003897_020	Hb_012305_060
Hb_000732_250	Hb_007403_100	Hb_004157_010	Hb_012325_020
Hb_007672_060	Hb_000836_290	Hb_000046_100	Hb_001287_040
Hb_007883_010	Hb_004332_020	Hb_000046_350	Hb_001433_140
Hb_000085_280	Hb_047086_010	Hb_046117_040	Hb_001473_100
Hb_009572_010	Hb_007509_010	Hb_004648_030	Hb_019654_060
Hb_001278_030	Hb_004082_020	Hb_004837_080	Hb_023001_040
Hb_000049_030	Hb_000770_010	Hb_004837_100	Hb_002311_370
Hb_001291_050	Hb_003805_100	Hb_000510_230	Hb_002477_120
Hb_011129_040	Hb_004585_050	Hb_005739_010	Hb_002659_020
Hb_001942_020	Hb_000141_250	Hb_000613_100	Hb_002835_280
Hb_002837_120	Hb_002242_020	Hb_000645_260	Hb_029243_020
Hb_004079_120	Hb_002995_040	Hb_006788_140	Hb_002965_160
Hb_000516_060	Hb_005362_030	Hb_007102_010	Hb_003633_100
Hb_012053_060	Hb_006271_010	Hb_007229_040	Hb_000369_030
Hb_001740_010	Hb_006603_010	Hb_007477_080	Hb_000417_380
Hb_000282_090	Hb_001315_090	Hb_000856_250	Hb_000424_040
Hb_000465_510	Hb_006267_030	Hb_000925_160	Hb_004294_020
Hb_006262_020	Hb_000694_110	Hb_000976_090	Hb_000046_350
Hb_003805_100	Hb_000905_150	Hb_000291_050	Hb_000005_280
Hb_010705_020	Hb_001369_490	Hb_004429_080	Hb_005015_020
Hb_001251_070	Hb_001396_210	Hb_003952_120	Hb_005152_010
Hb_001396_210	Hb_000184_030	Hb_006607_040	Hb_000538_080
Hb_044653_050	Hb_000201_080	Hb_013420_060	Hb_000613_100
Hb_008556_050	Hb_002095_010	Hb_041813_040	Hb_006332_030
Hb_000770_010	Hb_000215_220	Hb_000291_010	Hb_007102_010
Hb_003649_030	Hb_023344_080	Hb_000201_080	Hb_000732_250
Hb_011540_040	Hb_002471_040	Hb_002149_010	Hb_000739_190
Hb_012395_050	Hb_002701_210	Hb_002900_140	Hb_000808_210
Hb_001269_520	Hb_003053_070	Hb_000613_210	Hb_000816_200
Hb_001358_080	Hb_000340_300	Hb_010545_020	Hb_000856_250
Hb_001500_060	Hb_000413_190	Hb_011853_020	Hb_000092_120
Hb_001700_020	Hb_000465_330	Hb_001541_160	Hb_000925_160
Hb_001864_050	Hb_005271_070	Hb_001758_110	Hb_009707_030
Hb_002056_160	Hb_008556_050	Hb_000023_210	Hb_000997_130
Hb_023047_010	Hb_008725_280	Hb_000248_100	Hb_002908_050
Hb_002471_180	Hb_034594_010	Hb_025214_120	Hb_000205_130
Hb_025214_120	Hb_001291_050	Hb_000270_030	Hb_005063_060
Hb_002569_050	Hb_007695_030	Hb_002864_010	Hb_002078_330
Hb_000291_090	Hb_001031_120	Hb_000307_140	Hb_000613_210
Hb_030291_020	Hb_010334_030	Hb_033594_030	Hb_004787_100
Hb_003050_270	Hb_001085_220	Hb_003387_070	Hb_005181_180
Hb_031042_030	Hb_011173_040	Hb_003430_070	Hb_007821_010
Hb_000035_370	Hb_001244_090	Hb_003994_270	Hb_003298_020
Hb_003621_040	Hb_000161_140	Hb_004116_170	Hb_011282_060
Hb_004046_010	Hb_022998_010	Hb_000525_020	Hb_001534_140
Hb_004109_080	Hb_002411_140	Hb_000608_110	Hb_004907_070
Hb_044724_010	Hb_003469_010	Hb_000640_170	Hb_000103_480
Hb_004880_030	Hb_004162_310	Hb_000649_250	Hb_011853_020
Hb_000506_120	Hb_000501_020	Hb_000753_200	Hb_001391_020
Hb_000510_360	Hb_005165_020	Hb_000753_190	Hb_014361_150
Hb_000538_020	Hb_005623_040	Hb_008707_020	Hb_022693_130
Hb_005600_010	Hb_000742_140	Hb_000009_230	Hb_000270_030
Hb_000640_200	Hb_008791_010	Hb_009548_020	Hb_000270_360
Hb_000815_240	Hb_013738_010	Hb_001033_020	Hb_002864_010
Hb_000815_290	Hb_004760_050	Hb_005496_180	Hb_004117_090
Hb_011282_060	Hb_020985_010	Hb_006634_010	Hb_004291_040
Hb_001231_070	Hb_002298_040	Hb_009268_120	Hb_000562_040
Hb_001244_090	Hb_030190_030	Hb_001031_120	Hb_006197_010
Hb_001268_080	Hb_000302_140	Hb_002311_360	Hb_000008_290
Hb_003469_010	Hb_000329_370	Hb_000025_490	Hb_000847_050
Hb_004876_040	Hb_003427_040	Hb_000364_130	Hb_009079_030
Hb_008667_030	Hb_000521_150	Hb_004645_040	Hb_009252_140
Hb_003823_020	Hb_000538_010	Hb_004855_020	Hb_000029_050
Hb_001711_020	Hb_005455_110	Hb_007497_010	Hb_001793_050
Hb_013394_050	Hb_007163_110	Hb_001252_170	Hb_003464_080
Hb_000392_420	Hb_007913_040	Hb_013420_030	Hb_009793_010
Hb_007716_020	Hb_000008_390	Hb_041813_080	Hb_002200_020
Hb_002374_200	Hb_012797_010	Hb_001476_100	Hb_008103_120
Hb_002539_090	Hb_001750_030	Hb_000327_140	Hb_001476_100
Hb_000056_040	Hb_000195_050	Hb_004162_310	Hb_000109_200
Hb_000563_210	Hb_001965_120	Hb_002995_040	Hb_000111_390
Hb_006420_030	Hb_002792_040	Hb_004787_100	Hb_000111_380
Hb_006491_010	Hb_004453_140	Hb_048295_010	Hb_001133_020
Hb_000684_090	Hb_000820_020	Hb_008225_090	Hb_011381_080
Hb_011512_160	Hb_001933_020	Hb_000107_650	Hb_000116_460
Hb_030190_030	Hb_001989_060	Hb_000032_450	Hb_000117_060
Hb_003427_040	Hb_022487_010	Hb_003445_040	Hb_001310_050
Hb_000538_010	Hb_000258_380	Hb_008201_010	Hb_001405_090
Hb_000599_010	Hb_027506_060	Hb_000103_320	Hb_000165_110
Hb_007913_040	Hb_000373_290	Hb_010812_030	Hb_001671_090
Hb_011671_310	Hb_003994_110	Hb_001133_020	Hb_002217_060
Hb_042336_010	Hb_000692_210	Hb_011512_110	Hb_002600_070
Hb_001104_150	Hb_007956_020	Hb_000117_060	Hb_002631_070
Hb_011781_030	Hb_009793_010	Hb_011930_120	Hb_002648_040
Hb_015057_060	Hb_023647_040	Hb_001205_280	Hb_000283_120
Hb_001579_340	Hb_027010_010	Hb_012194_030	Hb_002871_180
Hb_002345_090	Hb_014700_020	Hb_001318_140	Hb_003197_050
Hb_003517_060	Hb_015057_060	Hb_001366_210	Hb_003304_040
Hb_003693_070	Hb_000179_010	Hb_001488_320	Hb_000340_060
Hb_003867_020	Hb_000002_170	Hb_001504_250	Hb_003905_040
Hb_005362_030	Hb_002217_380	Hb_015934_040	Hb_004046_030
Hb_006325_010	Hb_000282_090	Hb_001678_010	Hb_004109_250
Hb_006603_010	Hb_003517_060	Hb_017750_010	Hb_005142_010
Hb_010137_060	Hb_004321_040	Hb_001975_130	Hb_005488_130
Hb_001053_130	Hb_006262_020	Hb_002044_120	Hb_000056_170
Hb_000107_150	Hb_007542_020	Hb_002078_210	Hb_000567_060
Hb_001105_110	Hb_007809_090	Hb_023001_040	Hb_000057_150
Hb_001133_020	Hb_000976_440	Hb_024714_060	Hb_000856_100
Hb_011457_100	Hb_010545_020	Hb_002835_280	Hb_000869_080
Hb_011457_150	Hb_000130_380	Hb_003207_230	Hb_001789_160
Hb_001221_170	Hb_013405_200	Hb_003209_020	Hb_000032_450
Hb_012305_060	Hb_001454_360	Hb_003212_030	Hb_006588_160
Hb_012305_130	Hb_001500_060	Hb_003389_060	Hb_001017_030
Hb_001243_050	Hb_016189_010	Hb_000358_250	Hb_002026_150
Hb_001259_020	Hb_001700_020	Hb_003767_030	Hb_002107_160
Hb_012627_070	Hb_001716_020	Hb_004116_140	Hb_002811_100
Hb_001300_010	Hb_001741_030	Hb_004563_010	Hb_002811_090
Hb_001369_420	Hb_000206_160	Hb_005181_040	Hb_000417_060
Hb_000138_170	Hb_002498_100	Hb_005260_040	Hb_004970_200
Hb_001454_180	Hb_002518_280	Hb_005488_130	Hb_000193_030
Hb_001461_010	Hb_000254_100	Hb_000056_170	Hb_000193_040
Hb_001488_160	Hb_002965_040	Hb_006502_060	Hb_001008_040
Hb_001499_070	Hb_029664_010	Hb_006919_010	Hb_000928_060
Hb_001504_170	Hb_000307_140	Hb_007002_030	Hb_006040_160
Hb_000152_790	Hb_031042_030	Hb_000732_250	Hb_000331_130
Hb_001546_040	Hb_000032_200	Hb_007451_040	Hb_010545_020
Hb_001546_050	Hb_003376_120	Hb_007811_030	Hb_001225_040
Hb_001552_090	Hb_003486_010	Hb_000784_040	Hb_001541_160
Hb_000166_060	Hb_000035_370	Hb_000092_120	Hb_002276_190
Hb_001660_110	Hb_003621_040	Hb_000926_200	Hb_025214_120
Hb_002099_050	Hb_004148_020	Hb_000976_130	Hb_003060_030
Hb_000221_040	Hb_004156_070	Hb_016582_020	Hb_000307_140
Hb_000221_200	Hb_004176_100	Hb_000193_030	Hb_003387_070
Hb_002243_080	Hb_004631_210	Hb_000193_040	Hb_000434_050
Hb_000227_290	Hb_005240_010	Hb_041813_010	Hb_004787_040
Hb_002276_090	Hb_000590_090	Hb_009252_140	Hb_004855_020
Hb_002307_240	Hb_000665_190	Hb_001017_030	Hb_005725_130
Hb_002307_290	Hb_006925_070	Hb_014068_050	Hb_006059_030
Hb_000243_240	Hb_000751_050	Hb_002078_330	Hb_000061_400
Hb_000249_110	Hb_007511_010	Hb_002151_010	Hb_006501_050
Hb_025214_020	Hb_000771_050	Hb_002686_030	Hb_000661_090
Hb_000264_350	Hb_000815_290	Hb_002811_100	Hb_000684_040
Hb_002648_040	Hb_000959_380	Hb_002811_090	Hb_000836_160
Hb_002739_110	Hb_000237_120	Hb_000327_240	Hb_000009_230
Hb_002739_130	Hb_002873_080	Hb_000723_340	Hb_009524_020
Hb_000275_030	Hb_000500_310	Hb_007821_030	Hb_001031_120
Hb_000028_200	Hb_000000_310	Hb_007904_250	Hb_000227_340
Hb_002843_210	Hb_000000_370	Hb_001013_020	Hb_000987_170
Hb_029084_010	Hb_010029_010	Hb_010368_080	Hb_013420_050
Hb_029576_060	Hb_001003_030	Hb_001143_110	Hb_012412_010
Hb_002989_040	Hb_001005_070	Hb_000139_350	Hb_016582_020
Hb_000030_290	Hb_010218_020	Hb_001391_020	Hb_020661_010
Hb_030423_020	Hb_000103_020	Hb_001500_060	Hb_001033_020
Hb_003056_020	Hb_000103_060	Hb_000165_070	Hb_001902_030
Hb_000031_210	Hb_000103_320	Hb_022693_130	Hb_002374_200
Hb_003197_050	Hb_001030_040	Hb_000260_540	Hb_002030_110
Hb_000032_350	Hb_010417_100	Hb_002675_040	Hb_001135_210
Hb_000329_530	Hb_010583_030	Hb_000270_360	Hb_000260_790
Hb_003376_330	Hb_010775_020	Hb_000291_090	Hb_030082_030
Hb_000343_280	Hb_001085_190	Hb_029243_010	Hb_048295_010
Hb_003449_040	Hb_001086_020	Hb_003540_040	Hb_000792_050
Hb_000363_120	Hb_000011_140	Hb_004117_090	Hb_000258_380
Hb_000377_140	Hb_000011_170	Hb_005618_110	Hb_008201_010
Hb_000389_200	Hb_011161_080	Hb_006275_070	Hb_000010_350
Hb_003891_060	Hb_011287_080	Hb_000685_160	Hb_000100_060
Hb_000398_120	Hb_011310_030	Hb_007210_010	Hb_010672_040
Hb_004007_040	Hb_011457_150	Hb_000836_160	Hb_001123_190
Hb_004032_470	Hb_011472_010	Hb_009524_020	Hb_011310_030
Hb_004109_250	Hb_011512_120	Hb_001832_070	Hb_011457_120
Hb_004129_160	Hb_001152_040	Hb_015796_010	Hb_011457_150
Hb_000419_060	Hb_011540_020	Hb_001009_060	Hb_011930_120
Hb_042202_030	Hb_000120_510	Hb_010334_030	Hb_001258_040
Hb_000465_240	Hb_001202_010	Hb_000161_140	Hb_012743_010
Hb_005048_130	Hb_001205_290	Hb_001916_150	Hb_012799_150
Hb_005488_130	Hb_001221_170	Hb_002028_140	Hb_001318_140
Hb_005649_090	Hb_001221_200	Hb_002298_040	Hb_001369_110
Hb_005718_010	Hb_012320_010	Hb_000270_160	Hb_000140_200
Hb_005865_010	Hb_001243_050	Hb_002843_070	Hb_001504_250
Hb_000648_110	Hb_012553_030	Hb_004907_070	Hb_001511_250
Hb_000680_110	Hb_001268_150	Hb_000056_090	Hb_015934_040
Hb_006920_020	Hb_001269_460	Hb_008071_030	Hb_000189_190
Hb_007108_030	Hb_012753_170	Hb_009252_030	Hb_002046_200
Hb_000723_040	Hb_012753_160	Hb_000987_170	Hb_022250_160
Hb_007417_010	Hb_012760_040	Hb_012560_010	Hb_002553_040
Hb_000784_050	Hb_012807_080	Hb_000138_010	Hb_026284_010
Hb_007845_030	Hb_001291_070	Hb_001789_110	Hb_002686_280
Hb_007894_100	Hb_001295_070	Hb_002251_070	Hb_002749_060
Hb_000869_080	Hb_000134_060	Hb_004218_080	Hb_029576_060
Hb_008768_020	Hb_001369_420	Hb_006364_010	Hb_003032_110
Hb_000009_070	Hb_000138_170	Hb_000803_040	Hb_003144_010
Hb_000934_180	Hb_001386_090	Hb_000111_430	Hb_003209_020
Hb_000948_210	Hb_000139_150	Hb_001135_210	Hb_032568_010
Hb_000956_010	Hb_000140_200	Hb_044846_010	Hb_000336_280
Hb_009635_010	Hb_014384_030	Hb_000045_150	Hb_003404_010
Hb_001172_050	Hb_001439_180	Hb_000331_130	Hb_000358_210
Hb_003994_110	Hb_001477_050	Hb_004079_120	Hb_003767_030
Hb_000078_080	Hb_001487_010	Hb_002151_130	Hb_004109_240
Hb_008314_010	Hb_001488_320	Hb_042336_010	Hb_000413_010
Hb_008649_020	Hb_001504_170	Hb_000078_080	Hb_004157_010
Hb_005892_060	Hb_001511_200	Hb_000258_380	Hb_000042_030
Hb_001375_010	Hb_001512_070	Hb_004117_100	Hb_004208_030
Hb_024470_010	Hb_000152_020	Hb_004724_270	Hb_004223_280
Hb_008493_010	Hb_000152_740	Hb_019025_010	Hb_004310_010
Hb_001180_040	Hb_001541_090	Hb_003354_060	Hb_000442_100
Hb_001403_010	Hb_001546_090	Hb_001017_110	Hb_000046_100
Hb_001425_020	Hb_001552_090	Hb_001040_020	Hb_004648_030
Hb_023344_080	Hb_015882_010	Hb_010583_030	Hb_004724_210
Hb_004195_210	Hb_000160_120	Hb_000109_200	Hb_004837_080
Hb_004195_200	Hb_001628_110	Hb_000111_390	Hb_048476_110
Hb_000487_090	Hb_001633_200	Hb_000111_380	Hb_005048_130
Hb_004970_200	Hb_001646_020	Hb_001140_080	Hb_000510_230
Hb_005950_030	Hb_000165_110	Hb_000116_460	Hb_000521_260
Hb_006615_230	Hb_001652_130	Hb_001195_190	Hb_000522_170
Hb_007223_040	Hb_001660_110	Hb_000120_270	Hb_005288_140
Hb_007904_170	Hb_001699_240	Hb_012634_020	Hb_005305_070
Hb_007904_160	Hb_000170_090	Hb_001275_070	Hb_005305_080
Hb_000892_020	Hb_001715_030	Hb_001279_170	Hb_000061_460
Hb_009411_010	Hb_017164_010	Hb_012799_150	Hb_000614_170
Hb_002637_020	Hb_000173_230	Hb_001310_050	Hb_006483_050
Hb_013738_010	Hb_000174_170	Hb_001322_070	Hb_000675_130
Hb_001688_060	Hb_001754_150	Hb_001439_180	Hb_000678_010
Hb_019845_010	Hb_001755_030	Hb_014497_080	Hb_007229_040
Hb_021165_010	Hb_001772_030	Hb_001511_250	Hb_007313_070
Hb_023468_020	Hb_001775_050	Hb_000160_120	Hb_007441_330
Hb_004159_050	Hb_001776_160	Hb_000165_110	Hb_007441_340
Hb_006691_060	Hb_001780_150	Hb_016697_010	Hb_000752_020
Hb_001013_020	Hb_017941_010	Hb_001671_090	Hb_000753_250
Hb_010327_010	Hb_001856_030	Hb_000172_420	Hb_007632_020
Hb_000107_140	Hb_001856_190	Hb_000175_300	Hb_000796_190
Hb_010710_020	Hb_001892_120	Hb_001755_030	Hb_000925_060
Hb_001105_130	Hb_000019_060	Hb_001805_010	Hb_009265_040
Hb_000012_430	Hb_019586_020	Hb_001879_010	Hb_009393_010
Hb_012586_020	Hb_019654_060	Hb_001902_200	Hb_009421_070
Hb_001369_130	Hb_002044_120	Hb_001977_020	Hb_000956_010
Hb_001571_030	Hb_002045_160	Hb_002216_020	Hb_009771_100
Hb_001736_030	Hb_000205_120	Hb_000227_310	Hb_005357_110
Hb_000175_130	Hb_000205_110	Hb_023226_010	Hb_006395_010
Hb_001792_050	Hb_000206_080	Hb_025342_010	Hb_000078_080
Hb_001898_180	Hb_002071_040	Hb_002553_040	Hb_005695_050
Hb_001967_010	Hb_002078_220	Hb_002600_070	Hb_006040_020
Hb_002092_070	Hb_002099_050	Hb_026284_010	Hb_014068_050
Hb_002325_060	Hb_000211_070	Hb_002871_180	Hb_002477_260
Hb_003001_150	Hb_021443_090	Hb_002888_080	Hb_004221_010
Hb_000307_140	Hb_002188_140	Hb_002965_160	Hb_000723_340
Hb_032208_090	Hb_002188_170	Hb_000031_210	Hb_007904_250
Hb_003430_070	Hb_002193_010	Hb_000317_390	Hb_000926_290
Hb_003498_090	Hb_002217_320	Hb_003197_050	Hb_001375_010
Hb_003688_070	Hb_000223_200	Hb_000340_060	Hb_010172_040
Hb_005276_030	Hb_022501_020	Hb_003404_010	Hb_001059_120
Hb_006045_060	Hb_002259_090	Hb_003540_230	Hb_001153_250
Hb_000617_320	Hb_000226_120	Hb_000358_210	Hb_001318_010
Hb_006452_210	Hb_002263_010	Hb_003633_100	Hb_001357_370
Hb_000684_240	Hb_000227_290	Hb_000369_030	Hb_000139_350
Hb_007007_040	Hb_000227_310	Hb_000377_140	Hb_000023_210
Hb_007047_010	Hb_002272_080	Hb_003891_060	Hb_002669_010
Hb_000749_050	Hb_002290_040	Hb_003905_040	Hb_002687_060
Hb_007511_010	Hb_002298_050	Hb_004046_030	Hb_002783_060
Hb_008247_010	Hb_000023_310	Hb_004097_120	Hb_000028_330
Hb_008705_090	Hb_000230_390	Hb_004109_250	Hb_000291_090
Hb_000979_060	Hb_000230_490	Hb_000413_010	Hb_000331_680
Hb_000979_270	Hb_023001_010	Hb_000436_130	Hb_000529_220
Hb_000983_040	Hb_002304_030	Hb_000442_100	Hb_005348_120
Hb_003539_030	Hb_002307_240	Hb_004551_010	Hb_005618_110
Hb_001315_090	Hb_002311_300	Hb_004880_140	Hb_000608_110
Hb_015796_010	Hb_002320_060	Hb_000005_280	Hb_013420_010
Hb_011355_070	Hb_023504_010	Hb_000510_010	Hb_001143_200
Hb_001587_210	Hb_000237_210	Hb_005152_010	Hb_001242_180
Hb_002028_140	Hb_002380_010	Hb_000521_260	Hb_033509_020
Hb_002291_030	Hb_002391_090	Hb_005247_020	Hb_000438_140
Hb_028806_030	Hb_002400_350	Hb_000538_080	Hb_000563_250
Hb_029584_080	Hb_002411_030	Hb_000567_060	Hb_000753_200
Hb_003702_060	Hb_002411_120	Hb_000057_150	Hb_000753_190
Hb_009851_020	Hb_024590_010	Hb_000576_030	Hb_015796_010
Hb_034468_030	Hb_024714_110	Hb_005976_040	Hb_002374_450
Hb_001956_060	Hb_002477_120	Hb_000061_460	Hb_000809_230
Hb_001956_050	Hb_002498_050	Hb_000628_040	Hb_001707_010
Hb_004760_050	Hb_002502_040	Hb_000635_200	Hb_001009_060
Hb_000142_030	Hb_025214_020	Hb_000640_210	Hb_010334_030
Hb_002217_380	Hb_025311_010	Hb_000656_120	Hb_010712_020
Hb_000237_110	Hb_002571_110	Hb_006816_190	Hb_010712_030
Hb_003843_020	Hb_002603_100	Hb_000069_130	Hb_001571_080
Hb_000521_240	Hb_002627_060	Hb_007441_330	Hb_001635_190
Hb_000638_100	Hb_026284_010	Hb_007441_340	Hb_000025_490
Hb_007735_020	Hb_002631_180	Hb_007632_020	Hb_008071_030
Hb_008120_040	Hb_002636_080	Hb_007632_070	Hb_009252_030
Hb_000975_050	Hb_000264_350	Hb_000775_020	Hb_000002_170
Hb_001377_350	Hb_002648_040	Hb_007904_120	Hb_000051_040
Hb_001476_100	Hb_002659_040	Hb_000796_190	Hb_000627_050
Hb_000153_010	Hb_002660_060	Hb_007982_040	Hb_000236_160
Hb_000329_370	Hb_026698_020	Hb_000816_200	Hb_005194_020
Hb_000038_080	Hb_002681_140	Hb_008214_010	Hb_023661_020
Hb_004785_160	Hb_000271_030	Hb_000856_330	Hb_008493_010
Hb_000077_130	Hb_002739_130	Hb_008695_090	Hb_003334_040
Hb_023661_020	Hb_002739_150	Hb_000089_180	Hb_003445_040
Hb_009268_020	Hb_002759_050	Hb_000925_060	Hb_000373_290
Hb_030385_010	Hb_028109_010	Hb_009265_040	Hb_000390_150
Hb_007951_130	Hb_002823_010	Hb_009421_070	Hb_000000_310
Hb_011364_010	Hb_002843_210	Hb_009707_030	Hb_001017_110
Hb_012395_210	Hb_002870_020	Hb_009900_020	Hb_001017_150
Hb_001789_160	Hb_002922_010	Hb_001008_040	Hb_010407_190
Hb_001933_020	Hb_002942_100	Hb_001793_050	Hb_000110_110
Hb_007956_020	Hb_029584_090	Hb_010872_070	Hb_011108_010
Hb_001319_060	Hb_000003_140	Hb_000011_370	Hb_001140_080
Hb_002039_010	Hb_003010_030	Hb_011540_040	Hb_011512_110
Hb_002876_370	Hb_003010_040	Hb_001357_370	Hb_001157_220
Hb_000684_040	Hb_003018_190	Hb_001373_090	Hb_001163_040
Hb_010800_020	Hb_003020_300	Hb_001596_040	Hb_001186_070
Hb_001024_020	Hb_030423_020	Hb_001623_570	Hb_001195_360
Hb_000103_060	Hb_003058_260	Hb_000164_180	Hb_001199_110
Hb_010583_030	Hb_003106_250	Hb_001817_170	Hb_001205_280
Hb_001086_020	Hb_003120_020	Hb_001832_240	Hb_001218_040
Hb_000111_390	Hb_031527_090	Hb_019790_010	Hb_012320_010
Hb_000111_380	Hb_000316_050	Hb_002099_010	Hb_012539_060
Hb_001119_030	Hb_003206_090	Hb_002276_190	Hb_012627_070
Hb_000120_630	Hb_003207_230	Hb_023582_040	Hb_001268_150
Hb_012267_010	Hb_003216_100	Hb_002542_030	Hb_001279_170
Hb_000123_370	Hb_000322_100	Hb_002669_010	Hb_001287_060
Hb_012753_170	Hb_032202_130	Hb_028213_010	Hb_001357_280
Hb_012753_160	Hb_003248_040	Hb_000032_200	Hb_001358_010
Hb_001366_390	Hb_000329_080	Hb_000320_190	Hb_001408_040
Hb_001405_090	Hb_000033_120	Hb_000331_680	Hb_001411_140
Hb_001405_170	Hb_000331_060	Hb_036850_010	Hb_001488_320
Hb_014384_030	Hb_000331_330	Hb_000039_070	Hb_001565_050
Hb_001512_070	Hb_003376_070	Hb_003906_110	Hb_001627_010
Hb_001514_210	Hb_000340_440	Hb_004033_020	Hb_001638_310
Hb_000152_740	Hb_003401_030	Hb_004201_040	Hb_001662_090
Hb_000162_090	Hb_003428_100	Hb_046522_010	Hb_001678_010
Hb_000170_090	Hb_000343_280	Hb_004724_360	Hb_001755_030
Hb_017164_010	Hb_000347_430	Hb_005348_120	Hb_001881_020
Hb_001755_030	Hb_003540_230	Hb_000540_100	Hb_001975_130
Hb_001780_150	Hb_003544_030	Hb_000577_130	Hb_020400_020
Hb_017941_010	Hb_035677_010	Hb_005914_090	Hb_002044_120
Hb_001805_010	Hb_000358_010	Hb_000061_330	Hb_002088_030
Hb_001808_040	Hb_003581_020	Hb_006469_070	Hb_000221_230
Hb_000181_150	Hb_003614_020	Hb_006538_080	Hb_002298_050
Hb_001811_150	Hb_003633_100	Hb_007111_040	Hb_002326_120
Hb_001811_140	Hb_003656_180	Hb_007181_080	Hb_002477_290
Hb_000019_060	Hb_003659_010	Hb_007426_050	Hb_002571_110
Hb_019654_060	Hb_000375_320	Hb_000836_290	Hb_002675_080
Hb_002000_010	Hb_000375_310	Hb_000139_100	Hb_000270_570
Hb_002027_150	Hb_003767_030	Hb_000140_440	Hb_000270_580
Hb_002078_360	Hb_003784_040	Hb_001425_020	Hb_028227_030
Hb_002088_030	Hb_003896_020	Hb_001667_020	Hb_000029_120
Hb_000211_070	Hb_003927_060	Hb_001902_190	Hb_029920_020
Hb_002188_170	Hb_003927_070	Hb_002400_170	Hb_000300_190
Hb_002235_150	Hb_003939_020	Hb_000256_020	Hb_003023_060
Hb_002259_070	Hb_004032_410	Hb_002701_210	Hb_000331_310
Hb_000226_120	Hb_004097_120	Hb_002973_070	Hb_000336_210
Hb_002263_050	Hb_004109_250	Hb_003581_280	Hb_003389_060
Hb_002311_220	Hb_004121_010	Hb_004007_160	Hb_003398_080
Hb_002411_030	Hb_004157_050	Hb_004586_310	Hb_000345_030
Hb_002447_050	Hb_000416_160	Hb_005551_020	Hb_003540_230
Hb_000249_080	Hb_000042_280	Hb_000010_060	Hb_000363_120
Hb_002553_110	Hb_004208_120	Hb_010424_010	Hb_003659_010
Hb_002571_110	Hb_004223_040	Hb_002374_450	Hb_003749_010
Hb_000258_260	Hb_004224_020	Hb_004804_010	Hb_000377_140
Hb_002603_160	Hb_004278_020	Hb_041813_070	Hb_004096_210
Hb_002627_060	Hb_004324_040	Hb_006040_160	Hb_004128_140
Hb_000027_280	Hb_000436_130	Hb_001688_060	Hb_004157_050
Hb_000283_120	Hb_004366_010	Hb_002374_320	Hb_004563_010
Hb_028621_040	Hb_004410_010	Hb_002523_010	Hb_004881_100
Hb_003038_250	Hb_004422_020	Hb_000260_790	Hb_004931_060
Hb_003058_260	Hb_004429_110	Hb_033930_010	Hb_000495_060
Hb_031527_050	Hb_004545_050	Hb_000465_510	Hb_005181_040
Hb_032202_130	Hb_000046_130	Hb_020661_010	Hb_005260_040
Hb_000033_120	Hb_000469_050	Hb_008493_010	Hb_005305_010
Hb_033152_050	Hb_004705_080	Hb_011282_060	Hb_006152_020
Hb_003401_030	Hb_004724_100	Hb_001188_030	Hb_006157_010
Hb_003428_100	Hb_000479_290	Hb_001231_070	Hb_006501_010
Hb_000352_110	Hb_048141_050	Hb_001635_190	Hb_006538_030
Hb_003540_230	Hb_004837_100	Hb_000206_040	Hb_006615_240
Hb_003544_060	Hb_004846_060	Hb_000227_340	Hb_006816_190
Hb_003581_020	Hb_004881_100	Hb_002411_140	Hb_000007_470
Hb_003656_180	Hb_000049_140	Hb_002450_020	Hb_007002_030
Hb_003749_010	Hb_000490_030	Hb_000300_060	Hb_007451_040
Hb_000392_440	Hb_004931_060	Hb_035360_020	Hb_007508_070
Hb_003939_020	Hb_004987_070	Hb_000444_030	Hb_000754_040
Hb_000394_190	Hb_000500_040	Hb_020985_010	Hb_007594_040
Hb_004052_180	Hb_005015_030	Hb_023661_020	Hb_000077_230
Hb_004102_160	Hb_005098_030	Hb_000926_260	Hb_000077_320
Hb_004116_140	Hb_000522_040	Hb_007645_050	Hb_000077_310
Hb_000417_190	Hb_005227_070	Hb_006395_010	Hb_000776_050
Hb_004224_020	Hb_005288_140	Hb_000153_010	Hb_007765_140
Hb_004324_050	Hb_000053_120	Hb_000236_160	Hb_007811_030
Hb_000436_130	Hb_005305_010	Hb_003274_030	Hb_007811_040
Hb_000442_090	Hb_000531_040	Hb_004336_020	Hb_007849_010
Hb_004545_100	Hb_005321_030	Hb_000538_010	Hb_008014_040
Hb_000047_020	Hb_005332_010	Hb_000061_430	Hb_000809_040
Hb_000048_050	Hb_000536_070	Hb_000645_010	Hb_000811_060
Hb_004803_020	Hb_000538_080	Hb_000008_390	Hb_000836_460
Hb_004837_100	Hb_005463_030	Hb_000881_060	Hb_000085_270
Hb_048937_030	Hb_005539_140	Hb_001707_010	Hb_000853_290
Hb_000490_030	Hb_005615_010	Hb_002374_200	Hb_000086_500
Hb_004970_070	Hb_005649_090	Hb_001301_170	Hb_004218_080
Hb_005188_060	Hb_000567_280	Hb_000735_020	Hb_004966_050
Hb_000521_110	Hb_000571_120	Hb_001806_010	Hb_000649_250
Hb_005463_030	Hb_005725_190	Hb_000373_290	Hb_003562_030
Hb_000057_200	Hb_000574_420	Hb_034594_010	Hb_003788_010
Hb_000613_100	Hb_000576_030	Hb_023701_010	Hb_001143_110
Hb_000062_200	Hb_000585_050	Hb_005695_050	Hb_000120_030
Hb_000638_180	Hb_005865_010	Hb_000154_010	Hb_001269_520
Hb_006615_240	Hb_000594_090	Hb_034168_010	Hb_001519_100
Hb_006738_050	Hb_000006_020	Hb_013420_010	Hb_001623_570
Hb_006786_010	Hb_000613_100	Hb_000103_480	Hb_000170_260
Hb_006788_160	Hb_000613_170	Hb_000107_660	Hb_001741_030
Hb_000684_260	Hb_000062_200	Hb_001153_250	Hb_000176_040
Hb_000684_250	Hb_000622_290	Hb_011972_010	Hb_017770_010
Hb_007123_010	Hb_000627_240	Hb_001225_040	Hb_001817_170
Hb_000714_070	Hb_000638_010	Hb_001250_020	Hb_019863_060
Hb_000723_010	Hb_000638_180	Hb_001269_520	Hb_024650_020
Hb_000723_130	Hb_000656_120	Hb_012753_030	Hb_002784_060
Hb_007313_050	Hb_006570_070	Hb_000130_380	Hb_002910_010
Hb_007533_050	Hb_006612_030	Hb_001322_140	Hb_033594_030
Hb_000768_090	Hb_000663_020	Hb_014361_150	Hb_004156_070
Hb_007904_120	Hb_006683_010	Hb_001473_100	Hb_004724_360
Hb_000796_190	Hb_000669_040	Hb_000152_190	Hb_004846_220
Hb_008068_010	Hb_006718_040	Hb_001521_010	Hb_000540_100
Hb_000840_030	Hb_006738_050	Hb_001681_110	Hb_000057_140
Hb_008406_160	Hb_006786_010	Hb_001741_030	Hb_000570_020
Hb_008557_020	Hb_000679_200	Hb_001750_030	Hb_000059_350
Hb_000922_040	Hb_000680_110	Hb_001766_040	Hb_006275_070
Hb_009265_040	Hb_000683_150	Hb_017711_010	Hb_006469_070
Hb_000933_140	Hb_000684_240	Hb_001832_210	Hb_000656_200
Hb_009444_010	Hb_006846_110	Hb_019863_060	Hb_006816_460
Hb_000095_080	Hb_006901_020	Hb_002010_040	Hb_000684_080
Hb_009545_100	Hb_006919_010	Hb_000206_160	Hb_007382_050
Hb_009627_010	Hb_006920_020	Hb_000243_180	Hb_007426_050
Hb_000143_040	Hb_007017_060	Hb_002676_050	Hb_000078_180
Hb_003171_070	Hb_007017_110	Hb_002965_040	Hb_000783_010
Hb_004297_040	Hb_007048_020	Hb_000327_300	Hb_007866_010
Hb_000452_070	Hb_007072_020	Hb_003486_010	Hb_008578_020
Hb_008686_030	Hb_000071_080	Hb_000417_230	Hb_000917_100
Hb_000398_160	Hb_007108_030	Hb_004291_040	Hb_000977_100
Hb_008556_020	Hb_000714_070	Hb_004324_300	Hb_000979_070
Hb_002272_280	Hb_007185_050	Hb_000441_140	Hb_011909_060
Hb_010306_010	Hb_007218_080	Hb_044724_010	Hb_012016_020
Hb_001153_250	Hb_007218_150	Hb_004517_020	Hb_012055_080
Hb_012016_010	Hb_000723_010	Hb_004705_090	Hb_000140_440
Hb_001214_070	Hb_007237_090	Hb_004787_040	Hb_001579_180
Hb_000134_350	Hb_007313_020	Hb_000483_410	Hb_001667_020
Hb_001386_060	Hb_007336_030	Hb_000494_080	Hb_000197_270
Hb_000015_180	Hb_007474_010	Hb_005037_020	Hb_002025_100
Hb_000152_380	Hb_000753_250	Hb_005228_150	Hb_002400_170
Hb_000156_210	Hb_007532_040	Hb_000562_040	Hb_002471_040
Hb_016189_010	Hb_007533_050	Hb_000057_140	Hb_003175_110
Hb_001709_110	Hb_007672_060	Hb_000570_020	Hb_004032_270
Hb_001741_030	Hb_007679_010	Hb_000059_350	Hb_004162_190
Hb_001817_170	Hb_000077_320	Hb_000622_210	Hb_000066_180
Hb_000206_160	Hb_000077_310	Hb_000656_200	Hb_007558_060
Hb_002374_310	Hb_000777_080	Hb_000661_090	Hb_000975_320
Hb_002506_010	Hb_000784_050	Hb_000684_510	Hb_004953_020
Hb_002521_030	Hb_007849_010	Hb_000700_020	Hb_024693_010
Hb_025457_010	Hb_000796_020	Hb_000739_130	Hb_001338_070
Hb_002660_140	Hb_000799_050	Hb_000749_070	Hb_000010_060
Hb_027751_020	Hb_000008_090	Hb_007765_100	Hb_001102_300
Hb_002909_060	Hb_000808_210	Hb_000078_180	Hb_000368_090
Hb_029584_070	Hb_000813_120	Hb_000783_010	Hb_003875_030
Hb_031266_010	Hb_008406_140	Hb_007866_010	Hb_005663_070
Hb_032896_020	Hb_008406_160	Hb_000008_290	Hb_007575_080
Hb_000331_680	Hb_008456_040	Hb_008247_010	Hb_001104_150
Hb_000343_150	Hb_000085_280	Hb_000083_090	Hb_001124_140
Hb_000347_280	Hb_008598_010	Hb_000836_450	Hb_024074_010
Hb_003777_140	Hb_000869_080	Hb_000847_050	Hb_000261_130
Hb_003994_270	Hb_008768_020	Hb_008878_020	Hb_002740_010
Hb_004109_240	Hb_000088_100	Hb_009079_030	Hb_044846_010
Hb_004680_060	Hb_000890_140	Hb_000932_050	Hb_006603_010
Hb_000471_080	Hb_000009_070	Hb_000958_080	Hb_001172_100
Hb_005054_010	Hb_000908_030	Hb_000977_100	Hb_004466_030
Hb_005439_020	Hb_000908_070	Hb_001017_150	Hb_001052_020
Hb_005494_010	Hb_000091_100	Hb_000103_240	Hb_001188_030
Hb_000570_020	Hb_009135_020	Hb_010361_040	Hb_001195_270
Hb_000590_090	Hb_000914_030	Hb_010407_190	Hb_000123_310
Hb_000061_330	Hb_000917_320	Hb_000107_040	Hb_001251_070
Hb_006469_070	Hb_000922_040	Hb_000107_050	Hb_000141_200
Hb_006478_050	Hb_009252_130	Hb_000110_110	Hb_001433_100
Hb_006573_220	Hb_000926_200	Hb_000111_320	Hb_001545_130
Hb_000664_120	Hb_009265_040	Hb_011161_080	Hb_002010_040
Hb_000665_190	Hb_009278_010	Hb_001123_020	Hb_002028_140
Hb_006925_070	Hb_000931_010	Hb_001143_090	Hb_002986_080
Hb_007333_020	Hb_000957_010	Hb_011457_100	Hb_035360_020
Hb_007632_210	Hb_009572_010	Hb_011457_120	Hb_000444_030
Hb_000768_030	Hb_009635_010	Hb_001157_210	Hb_000501_020
Hb_000796_200	Hb_000964_030	Hb_001157_220	Hb_005346_010
Hb_000815_270	Hb_000964_070	Hb_000116_060	Hb_000645_010
Hb_009738_040	Hb_000975_180	Hb_001195_360	Hb_007747_170
Hb_000990_060	Hb_000976_340	Hb_001199_110	Hb_022092_050
Hb_001017_030	Hb_006213_050	Hb_000123_370	Hb_024470_010
Hb_001047_030	Hb_001242_180	Hb_001269_270	Hb_004737_020
Hb_000108_180	Hb_001789_110	Hb_001269_460	Hb_000941_010
Hb_000184_030	Hb_002031_010	Hb_012743_010	Hb_000107_510
Hb_001959_040	Hb_002374_200	Hb_001287_060	Hb_004162_310
Hb_002151_010	Hb_038965_010	Hb_000129_010	Hb_004650_120
Hb_000265_180	Hb_004285_050	Hb_001369_060	Hb_000538_010
Hb_000340_300	Hb_006364_010	Hb_014384_030	Hb_007163_110
Hb_003952_140	Hb_017134_010	Hb_001454_180	Hb_007765_080
Hb_004324_060	Hb_003168_050	Hb_001476_080	Hb_000008_390
Hb_000483_480	Hb_005063_060	Hb_000152_020	Hb_001935_140
Hb_000567_060	Hb_001049_070	Hb_000152_790	Hb_006607_040
Hb_006452_200	Hb_010617_020	Hb_001638_310	Hb_003354_060
Hb_000699_020	Hb_000108_180	Hb_001662_090	Hb_002299_060
Hb_007525_020	Hb_001251_070	Hb_001681_050	Hb_002542_030
Hb_008001_020	Hb_000128_090	Hb_001754_100	Hb_006603_020
Hb_000868_050	Hb_000139_100	Hb_001775_070	Hb_000997_410
Hb_000904_090	Hb_001403_010	Hb_001779_050	Hb_000569_020
Hb_000922_120	Hb_001425_020	Hb_000181_080	Hb_005892_060
Hb_000437_080	Hb_001452_140	Hb_001856_190	Hb_004760_050
Hb_000569_020	Hb_001515_060	Hb_000186_090	Hb_000103_320
Hb_012702_010	Hb_001545_270	Hb_000193_290	Hb_001040_020
Hb_028912_050	Hb_016038_010	Hb_000193_280	Hb_010583_030
Hb_000331_130	Hb_001662_110	Hb_000198_070	Hb_010661_010
Hb_001016_130	Hb_001667_020	Hb_000206_080	Hb_000107_040
Hb_000111_100	Hb_001970_030	Hb_002088_030	Hb_000107_050
Hb_014700_020	Hb_002073_120	Hb_021596_070	Hb_010872_060
Hb_001597_050	Hb_002149_010	Hb_002217_060	Hb_001097_060
Hb_001791_010	Hb_002151_010	Hb_022250_160	Hb_001104_260
Hb_002242_020	Hb_000261_150	Hb_002249_020	Hb_001123_020
Hb_000264_170	Hb_000265_180	Hb_000227_290	Hb_001157_210
Hb_004327_030	Hb_002686_030	Hb_002273_060	Hb_001195_190
Hb_006915_010	Hb_002809_050	Hb_002276_090	Hb_000120_270
Hb_007632_220	Hb_002811_100	Hb_002298_050	Hb_012402_010
Hb_007919_050	Hb_002811_090	Hb_023536_010	Hb_001279_240
Hb_001016_080	Hb_002900_140	Hb_000243_370	Hb_001322_070
Hb_001031_120	Hb_031076_050	Hb_024758_020	Hb_001328_070
Hb_010916_010	Hb_003149_020	Hb_002477_260	Hb_001357_050
Hb_000141_200	Hb_000327_240	Hb_002498_050	Hb_001366_210
Hb_001486_260	Hb_000329_500	Hb_025214_020	Hb_001369_060
Hb_001689_020	Hb_003376_320	Hb_000258_170	Hb_001369_450
Hb_033834_020	Hb_000345_390	Hb_000260_300	Hb_001391_050
Hb_003711_050	Hb_000345_380	Hb_002648_040	Hb_014384_030
Hb_004162_310	Hb_003504_020	Hb_002650_010	Hb_014497_050
Hb_005817_010	Hb_003581_280	Hb_002675_080	Hb_001476_080
Hb_006452_220	Hb_003656_060	Hb_002686_280	Hb_001489_080
Hb_000172_340	Hb_003809_020	Hb_027654_060	Hb_001493_050
Hb_022593_070	Hb_038107_030	Hb_000283_120	Hb_000152_740
Hb_001357_370	Hb_004116_040	Hb_000029_120	Hb_000152_790
Hb_003867_030	Hb_004195_210	Hb_000297_100	Hb_000152_850
Hb_004285_050	Hb_004195_200	Hb_029920_020	Hb_001546_040
Hb_000046_550	Hb_004319_070	Hb_003018_050	Hb_001546_050
Hb_004966_050	Hb_000443_030	Hb_003023_060	Hb_015934_050
Hb_005841_040	Hb_000483_480	Hb_003029_030	Hb_000160_120
Hb_013567_020	Hb_000487_090	Hb_003078_070	Hb_016697_010
Hb_004116_020	Hb_005000_290	Hb_031527_080	Hb_001711_040
Hb_006213_050	Hb_005043_010	Hb_031527_090	Hb_000172_100
Hb_002873_080	Hb_000532_040	Hb_000316_110	Hb_000175_300
Hb_005542_150	Hb_005494_010	Hb_003207_170	Hb_017750_010
Hb_017134_010	Hb_000571_070	Hb_032568_010	Hb_001790_080
Hb_020985_010	Hb_005950_030	Hb_000331_310	Hb_000181_080
Hb_000322_130	Hb_006120_110	Hb_003398_080	Hb_001840_110
Hb_003792_040	Hb_000613_210	Hb_000347_280	Hb_001856_190
Hb_003761_010	Hb_006452_200	Hb_000363_120	Hb_001879_010
Hb_003777_100	Hb_006615_230	Hb_003645_020	Hb_000019_140
Hb_004689_050	Hb_000684_180	Hb_000365_200	Hb_001902_180
Hb_000527_010	Hb_007223_040	Hb_000373_090	Hb_000197_210
Hb_010815_010	Hb_000723_340	Hb_003784_040	Hb_021596_070
Hb_022793_010	Hb_007451_030	Hb_003857_010	Hb_000216_050
Hb_000139_250	Hb_007451_020	Hb_038606_010	Hb_002216_020
Hb_012545_080	Hb_007904_170	Hb_000389_200	Hb_002217_340
Hb_001989_060	Hb_007904_160	Hb_003952_140	Hb_002232_160
Hb_002043_050	Hb_008001_020	Hb_003992_260	Hb_022501_020
Hb_000205_130	Hb_000085_120	Hb_003994_150	Hb_002273_060
Hb_000392_050	Hb_008616_070	Hb_004055_020	Hb_023001_070
Hb_006603_020	Hb_000868_050	Hb_004109_240	Hb_023226_010
Hb_001348_060	Hb_000892_020	Hb_000412_030	Hb_000236_280
Hb_001478_060	Hb_009065_010	Hb_004143_120	Hb_000236_270
Hb_001780_130	Hb_009411_010	Hb_000417_190	Hb_002374_240
Hb_023701_010	Hb_001923_030	Hb_000418_090	Hb_002411_030
Hb_008206_060	Hb_011515_020	Hb_004208_030	Hb_024714_060
Hb_001005_070	Hb_019496_010	Hb_004230_060	Hb_024714_100
Hb_010417_070	Hb_000345_020	Hb_000424_040	Hb_024714_090
Hb_001047_230	Hb_024324_010	Hb_000424_230	Hb_024758_020
Hb_010589_050	Hb_000137_150	Hb_004294_020	Hb_000260_300
Hb_000109_090	Hb_001500_120	Hb_004324_030	Hb_000265_170
Hb_000011_190	Hb_001607_010	Hb_004324_050	Hb_002650_010
Hb_001118_020	Hb_019187_020	Hb_004324_210	Hb_000270_610
Hb_001123_050	Hb_001674_050	Hb_004440_100	Hb_000270_620
Hb_001146_060	Hb_002814_130	Hb_004607_020	Hb_027445_070
Hb_011640_020	Hb_000557_030	Hb_000465_150	Hb_002760_060
Hb_000012_100	Hb_005710_020	Hb_000466_070	Hb_002783_260
Hb_000120_510	Hb_008871_010	Hb_004722_050	Hb_029322_010
Hb_001205_280	Hb_001269_550	Hb_004724_130	Hb_002942_070
Hb_001214_160	Hb_000007_330	Hb_004724_330	Hb_029510_140
Hb_012553_030	Hb_025652_010	Hb_004931_050	Hb_002968_050
Hb_012779_110	Hb_002665_030	Hb_000495_060	Hb_000297_020
Hb_012807_080	Hb_028816_010	Hb_005015_020	Hb_000297_100
Hb_001300_070	Hb_000392_140	Hb_005016_130	Hb_003010_030
Hb_001365_040	Hb_000455_090	Hb_005048_130	Hb_003010_040
Hb_001386_090	Hb_000075_010	Hb_000510_140	Hb_003018_050
Hb_000139_150	Hb_001053_070	Hb_000521_110	Hb_003018_200
Hb_001410_150	Hb_006721_030	Hb_005233_050	Hb_003038_250
Hb_001416_040	Hb_024185_010	Hb_005288_140	Hb_003097_110
Hb_001477_050	Hb_009268_220	Hb_005305_140	Hb_003097_100
Hb_001501_080	Hb_011355_040	Hb_005511_100	Hb_000031_210
Hb_001532_060	Hb_001677_040	Hb_005539_340	Hb_031527_090
Hb_000156_160	Hb_001797_010	Hb_005539_350	Hb_003207_170
Hb_001646_020	Hb_003914_050	Hb_000571_120	Hb_000322_100
Hb_001652_130	Hb_020178_020	Hb_000594_090	Hb_032202_130
Hb_000017_250	Hb_036849_010	Hb_000613_170	Hb_000345_500
Hb_017693_010	Hb_034561_030	Hb_006152_020	Hb_003498_050
Hb_001779_050	Hb_000100_110	Hb_006538_030	Hb_000365_200
Hb_001790_080	Hb_027346_020	Hb_006570_070	Hb_003667_020
Hb_001856_030	Hb_000491_020	Hb_000675_130	Hb_000373_090
Hb_000191_080	Hb_019441_010	Hb_006788_160	Hb_000038_070
Hb_000193_160	Hb_002741_030	Hb_006846_110	Hb_003857_010
Hb_001948_060	Hb_010337_030	Hb_000692_230	Hb_004055_020
Hb_000200_190	Hb_001531_020	Hb_007030_020	Hb_004076_060
Hb_000206_080	Hb_001990_020	Hb_007108_030	Hb_004102_010
Hb_020648_030	Hb_000030_290	Hb_000723_010	Hb_004116_140
Hb_002071_040	Hb_000510_350	Hb_000723_040	Hb_000418_090
Hb_002078_190	Hb_000613_020	Hb_000731_190	Hb_004230_060
Hb_002078_220	Hb_007416_040	Hb_007313_070	Hb_000424_230
Hb_000208_280	Hb_004652_020	Hb_007508_070	Hb_004324_040
Hb_021241_010	Hb_010287_030	Hb_000752_020	Hb_000436_130
Hb_000215_170	Hb_000164_150	Hb_007532_040	Hb_000441_210
Hb_000215_370	Hb_020712_030	Hb_000755_060	Hb_004440_100
Hb_002151_040	Hb_001911_040	Hb_007594_040	Hb_004598_010
Hb_002157_240	Hb_006045_060	Hb_000077_230	Hb_000046_490
Hb_000223_200	Hb_001898_040	Hb_000776_050	Hb_000462_110
Hb_002281_020	Hb_026049_010	Hb_007765_140	Hb_004712_160
Hb_002289_180	Hb_008803_040	Hb_007849_010	Hb_004724_130
Hb_002304_030	Hb_001025_150	Hb_008014_040	Hb_004846_060
Hb_023504_010	Hb_001337_010	Hb_000809_040	Hb_000005_340
Hb_002374_280	Hb_011108_010	Hb_000856_100	Hb_000510_010
Hb_002391_090	Hb_012239_060	Hb_000856_130	Hb_000510_240
Hb_002391_360	Hb_002026_130	Hb_000869_080	Hb_005211_140
Hb_000243_370	Hb_021703_010	Hb_008695_150	Hb_005233_050
Hb_002435_110	Hb_003098_060	Hb_008700_010	Hb_005375_070
Hb_000025_470	Hb_003407_010	Hb_000890_070	Hb_005463_020
Hb_002609_060	Hb_000505_010	Hb_009393_010	Hb_000571_120
Hb_002631_070	Hb_005709_010	Hb_009421_090	Hb_005739_010
Hb_002631_180	Hb_006916_150	Hb_000983_090	Hb_000574_470
Hb_002636_080	Hb_000007_160	Hb_013420_050	Hb_000576_030
Hb_002671_100	Hb_002260_090	Hb_001124_140	Hb_005914_220
Hb_000270_790	Hb_023344_160	Hb_012053_060	Hb_000062_260
Hb_002701_090	Hb_003646_010	Hb_002217_380	Hb_000625_090
Hb_002735_010	Hb_000735_180	Hb_024074_010	Hb_000635_200
Hb_002739_150	Hb_020357_020	Hb_002740_010	Hb_006502_060
Hb_002740_170	Hb_000099_200	Hb_002900_060	Hb_000665_030
Hb_028109_010	Hb_028871_020	Hb_033452_020	Hb_006846_110
Hb_002823_010	Hb_007760_030	Hb_003835_080	Hb_000069_130
Hb_000284_130	Hb_016602_020	Hb_004354_010	Hb_000069_690
Hb_000284_220	Hb_001366_220	Hb_008511_030	Hb_007030_020
Hb_000284_210	Hb_007796_040	Hb_000091_020	Hb_000710_070
Hb_002871_060	Hb_004218_080	Hb_000976_440	Hb_007229_090
Hb_002942_100	Hb_001782_110	Hb_001102_300	Hb_000731_190
Hb_029510_140	Hb_001360_010	Hb_002200_020	Hb_000731_260
Hb_029584_090	Hb_012167_020	Hb_004970_220	Hb_007370_010
Hb_000003_140	Hb_006746_010	Hb_007702_030	Hb_000739_240
Hb_003126_080	Hb_001234_050	Hb_000809_230	Hb_007407_010
Hb_000316_050	Hb_002662_100	Hb_001366_260	Hb_007441_140
Hb_003207_110	Hb_004185_020	Hb_001369_490	Hb_007477_080
Hb_003212_020	Hb_000914_070	Hb_001579_180	Hb_007532_040
Hb_003216_100	Hb_009249_010	Hb_016038_010	Hb_000755_060
Hb_000331_060	Hb_009249_020	Hb_000184_030	Hb_007558_090
Hb_003376_070	Hb_000959_220	Hb_023661_070	Hb_007883_010
Hb_003389_060	Hb_001204_010	Hb_002471_040	Hb_000796_060
Hb_003405_060	Hb_001281_060	Hb_000276_020	Hb_000817_030
Hb_000358_010	Hb_001675_170	Hb_003965_010	Hb_008453_040
Hb_000359_190	Hb_001902_140	Hb_004076_050	Hb_000856_330
Hb_036790_020	Hb_019641_030	Hb_004162_190	Hb_008695_150
Hb_003927_070	Hb_000197_300	Hb_004491_030	Hb_000088_030
Hb_003992_260	Hb_002085_020	Hb_004586_180	Hb_000890_070
Hb_004032_410	Hb_002104_020	Hb_000567_050	Hb_000907_140
Hb_004109_310	Hb_000220_100	Hb_006120_110	Hb_009252_120
Hb_004162_280	Hb_000230_380	Hb_000066_180	Hb_000934_180
Hb_004228_070	Hb_002457_060	Hb_007558_060	Hb_000960_020
Hb_004278_020	Hb_002570_050	Hb_000811_060	Hb_000964_030
Hb_004324_040	Hb_029243_020	Hb_000926_290	Hb_009767_130
Hb_004393_010	Hb_003225_040	Hb_009493_010	Hb_000983_090
Hb_004410_010	Hb_033843_010	Hb_001097_160	Hb_010264_010
Hb_004429_110	Hb_003428_130	Hb_004466_030	Hb_001045_110
Hb_004545_050	Hb_000345_530	Hb_007072_030	Hb_000108_090
Hb_000046_240	Hb_000356_090	Hb_001143_200	Hb_000111_430
Hb_046117_040	Hb_000406_030	Hb_001242_180	Hb_011360_060
Hb_004652_040	Hb_004478_050	Hb_001902_030	Hb_011360_050
Hb_004690_020	Hb_005479_010	Hb_003376_230	Hb_011472_020
Hb_004712_160	Hb_005539_100	Hb_000438_140	Hb_001158_130
Hb_004832_030	Hb_000576_040	Hb_007669_010	Hb_001159_050
Hb_004881_050	Hb_000586_170	Hb_012412_010	Hb_011628_010
Hb_000494_020	Hb_005882_020	Hb_004953_020	Hb_012545_040
Hb_000494_030	Hb_005916_030	Hb_002030_110	Hb_000127_220
Hb_005015_030	Hb_006096_040	Hb_003168_050	Hb_012725_090
Hb_005188_070	Hb_006132_110	Hb_001398_070	Hb_012754_040
Hb_005227_070	Hb_006805_010	Hb_001141_210	Hb_001277_050
Hb_005305_010	Hb_000732_210	Hb_001159_190	Hb_001322_140
Hb_005321_030	Hb_000905_030	Hb_000123_310	Hb_001357_200
Hb_000054_090	Hb_009083_030	Hb_000141_200	Hb_001379_070
Hb_000547_020	Hb_000922_400	Hb_001534_140	Hb_001484_100
Hb_005504_010	Hb_000975_350	Hb_001675_090	Hb_001521_010
Hb_000056_190	Hb_004297_010	Hb_001866_100	Hb_001677_220
Hb_000056_250	Hb_010588_020	Hb_001866_110	Hb_001749_030
Hb_000567_280	Hb_001269_390	Hb_001951_110	Hb_001767_050
Hb_005725_190	Hb_015276_010	Hb_000367_060	Hb_017948_010
Hb_000576_030	Hb_023278_030	Hb_004899_210	Hb_000206_160
Hb_005797_040	Hb_031501_010	Hb_000633_040	Hb_002099_010
Hb_000058_130	Hb_000573_150	Hb_000720_050	Hb_002107_100
Hb_000006_020		Hb_000742_140	Hb_002184_110
Hb_006106_020		Hb_001935_140	Hb_025194_050
Hb_000616_100		Hb_022832_050	Hb_025194_060
Hb_000620_080		Hb_000208_110	Hb_002600_090
Hb_000627_240		Hb_005438_020	Hb_002843_220
Hb_000638_010		Hb_000107_510	Hb_002890_100
Hb_000640_210		Hb_000115_360	Hb_002890_350
Hb_006501_010		Hb_002965_150	Hb_029238_040
Hb_006533_020		Hb_000003_660	Hb_002965_040
Hb_006683_010		Hb_004785_160	Hb_000031_170
Hb_000669_040		Hb_005194_020	Hb_003119_040
Hb_006776_010		Hb_006601_010	Hb_003124_030
Hb_000679_200		Hb_000111_180	Hb_000331_100
Hb_000069_380		Hb_001999_290	Hb_000347_310
Hb_006901_020		Hb_003875_030	Hb_003540_040
Hb_006907_120		Hb_000441_190	Hb_000367_060
Hb_006938_050		Hb_005357_110	Hb_004223_230
Hb_007017_060		Hb_005362_030	Hb_004225_140
Hb_007017_110		Hb_000728_050	Hb_000431_150
Hb_007030_020		Hb_001001_020	Hb_000441_140
Hb_007218_100		Hb_001789_160	Hb_000454_040
Hb_007532_040		Hb_027506_060	Hb_000465_130
Hb_000754_040		Hb_038377_010	Hb_004659_010
Hb_000767_020		Hb_000390_150	Hb_004785_090
Hb_000778_010		Hb_004637_010	Hb_000479_170
Hb_000808_210		Hb_005920_030	Hb_005265_030
Hb_000832_130		Hb_009316_050	Hb_005357_080
Hb_008456_040		Hb_000997_410	Hb_000575_120
Hb_000868_110		Hb_005211_120	Hb_005928_100
Hb_008695_150		Hb_009793_010	Hb_000061_330
Hb_000882_010		Hb_022092_050	Hb_000622_210
Hb_000890_140		Hb_028872_020	Hb_000661_040
Hb_000922_010		Hb_000312_090	Hb_000665_230
Hb_009252_130		Hb_000312_080	Hb_000665_270
Hb_000926_180		Hb_033304_010	Hb_000068_030
Hb_000960_040		Hb_003428_040	Hb_007290_070
Hb_009707_030		Hb_034642_010	Hb_000749_070
Hb_000975_180		Hb_000563_210	Hb_008225_060
Hb_000983_090		Hb_000563_250	Hb_008247_010
Hb_010068_040		Hb_006059_030	Hb_000834_060
Hb_001348_080		Hb_000684_090	Hb_008705_090
Hb_001396_090		Hb_006970_010	Hb_009178_070
Hb_016347_010		Hb_001364_020	Hb_009548_020
Hb_022092_050		Hb_001780_130	Hb_009662_060
Hb_002305_010		Hb_003562_030	Hb_002374_320
Hb_027654_080		Hb_003788_010	Hb_005362_030
Hb_003538_010		Hb_004297_040	Hb_034168_050
Hb_000359_020		Hb_005892_060	Hb_005438_020
Hb_000373_270		Hb_032083_020	Hb_012779_090
Hb_005116_030		Hb_001032_040	Hb_002411_160
Hb_006911_070		Hb_011781_030	Hb_000307_110
Hb_006970_010		Hb_012423_050	Hb_033930_010
Hb_000839_010		Hb_001591_010	Hb_000457_170
Hb_008473_020		Hb_000002_170	Hb_047510_020
Hb_001006_180		Hb_002421_100	Hb_000696_040
Hb_010545_020		Hb_000261_130	Hb_007181_080
Hb_001080_100		Hb_003494_170	Hb_011512_050
Hb_001102_020		Hb_003517_060	Hb_011512_060
Hb_001143_200		Hb_000544_110	Hb_011972_010
Hb_012753_030		Hb_000579_030	Hb_001591_010
Hb_001403_070		Hb_000059_010	Hb_001649_050
Hb_014068_010		Hb_006588_160	Hb_001811_020
Hb_000147_010		Hb_006603_010	Hb_002553_080
Hb_001635_020		Hb_000705_300	Hb_033452_020
Hb_000172_570		Hb_007632_220	Hb_003847_020
Hb_001743_020		Hb_013420_040	Hb_000465_510
Hb_001782_110		Hb_010172_040	Hb_005214_160
Hb_000179_260		Hb_010407_150	Hb_000705_300
Hb_019613_020		Hb_000108_090	Hb_008511_030
Hb_002071_070		Hb_000110_260	Hb_000976_440
Hb_002078_280		Hb_011472_020	Hb_000552_040
Hb_002157_110		Hb_001159_050	Hb_007702_030
Hb_002174_020		Hb_000120_030	Hb_001956_060
Hb_002262_010		Hb_012055_110	Hb_001956_050
Hb_002374_390		Hb_012505_010	Hb_004109_210
Hb_000249_090		Hb_012545_040	Hb_001017_130
Hb_002492_020		Hb_012725_090	Hb_010705_020
Hb_002510_060		Hb_012768_010	Hb_000120_760
Hb_000254_120		Hb_001300_080	Hb_001369_490
Hb_000254_100		Hb_001386_060	Hb_000139_100
Hb_000264_090		Hb_001519_100	Hb_001610_140
Hb_000265_220		Hb_001562_030	Hb_000184_030
Hb_002659_140		Hb_016189_010	Hb_001902_190
Hb_000270_710		Hb_017770_010	Hb_001910_010
Hb_027472_010		Hb_017948_010	Hb_000256_020
Hb_027472_020		Hb_019613_020	Hb_027119_010
Hb_029238_040		Hb_002027_030	Hb_002973_070
Hb_002944_020		Hb_002184_110	Hb_000032_460
Hb_002983_050		Hb_002234_010	Hb_000320_460
Hb_000302_090		Hb_024570_010	Hb_033412_010
Hb_030982_030		Hb_002510_060	Hb_003434_030
Hb_031076_050		Hb_000260_640	Hb_004007_160
Hb_003125_170		Hb_002600_090	Hb_004586_310
Hb_003777_360		Hb_002639_100	Hb_005883_030
Hb_003849_260		Hb_002687_060	Hb_006198_190
Hb_003906_040		Hb_002784_060	Hb_007894_170
Hb_000454_180		Hb_027998_010	Hb_000080_200
Hb_000479_170		Hb_002890_100	Hb_000928_190
Hb_005463_060		Hb_000291_190	Hb_009493_010
Hb_000627_230		Hb_029238_040	Hb_001278_030
Hb_006365_030		Hb_029904_040	Hb_000015_010
Hb_000656_240		Hb_003050_140	Hb_032550_010
Hb_006573_300		Hb_000316_100	Hb_007072_030
Hb_000069_140		Hb_032202_050	Hb_008587_060
Hb_006907_090		Hb_000035_480	Hb_001013_040
Hb_000707_100		Hb_000367_250	Hb_032969_010
Hb_007403_100		Hb_003839_060	Hb_000115_340
Hb_007426_050		Hb_004147_030	Hb_001866_100
Hb_000751_050		Hb_004148_020	Hb_001866_110
Hb_000757_060		Hb_004156_070	Hb_002259_170
Hb_000768_210		Hb_004225_140	Hb_002411_140
Hb_000080_150		Hb_042664_010	Hb_002450_020
Hb_000856_040		Hb_000429_140	Hb_000270_500
Hb_009510_020		Hb_000431_150	Hb_002759_200
Hb_000956_030		Hb_000454_040	Hb_000487_410
Hb_000976_440		Hb_004680_060	Hb_005010_040
Hb_011918_070		Hb_000479_130	Hb_000566_050
Hb_000441_190		Hb_000479_170	Hb_005731_050
Hb_000019_230		Hb_004884_200	Hb_000633_040
Hb_002007_330		Hb_000005_340	Hb_000720_050
Hb_000250_030		Hb_005059_020	Hb_007497_010
Hb_000694_110		Hb_005081_060	Hb_000788_020
Hb_001025_160		Hb_005265_030	Hb_000856_400
Hb_010519_040		Hb_000529_220	Hb_003527_020
Hb_011883_020		Hb_005357_080	Hb_000612_030
Hb_001369_230		Hb_000537_140	Hb_042463_010
Hb_001832_080		Hb_000537_130	Hb_000153_010
Hb_027445_100		Hb_005615_010	Hb_002043_050
Hb_030082_030		Hb_005656_050	Hb_003427_040
Hb_003050_010		Hb_005656_070	Hb_004785_160
Hb_000390_250		Hb_005725_130	Hb_007913_040
Hb_005563_010		Hb_000575_120	Hb_000881_060
Hb_000649_240		Hb_000590_090	Hb_001691_060
Hb_007542_020		Hb_006048_010	Hb_001832_070
Hb_007904_080		Hb_006124_020	Hb_000151_040
Hb_007904_070		Hb_000622_240	Hb_001981_020
Hb_001049_070		Hb_006573_220	Hb_002251_070
Hb_010617_020		Hb_000665_230	Hb_032083_020
Hb_001301_120		Hb_000665_270	Hb_033304_010
Hb_001369_490		Hb_000068_030	Hb_038965_010
Hb_001545_270		Hb_006816_370	Hb_005731_130
Hb_001662_110		Hb_000684_080	Hb_006364_010
Hb_001975_120		Hb_007333_020	Hb_000959_160
Hb_002149_010		Hb_007382_050	Hb_000107_650
Hb_002232_350		Hb_007403_100	Hb_000172_230
Hb_002311_350		Hb_007432_020	Hb_027506_060
Hb_002477_260		Hb_000815_290	Hb_004117_100
Hb_002701_210		Hb_000834_060	Hb_000237_120
Hb_000300_630		Hb_000866_190	Hb_000154_010
Hb_003149_020		Hb_008705_090	Hb_013420_040
Hb_000342_060		Hb_000886_020	Hb_001806_010
Hb_000345_390		Hb_000896_040	Hb_000452_070
Hb_000345_380		Hb_000917_100	Hb_007951_080
Hb_038107_030		Hb_009178_070	Hb_015386_060
Hb_000445_020		Hb_000959_380	Hb_001032_040
Hb_005207_030		Hb_009711_030	Hb_011781_030
Hb_000771_060		Hb_000979_070	Hb_012053_060
Hb_000840_250		Hb_011264_010	Hb_002900_060
Hb_008725_280		Hb_006040_020	Hb_000313_380
Hb_000883_190		Hb_000250_030	Hb_003362_030
Hb_000997_110		Hb_028227_060	Hb_003435_040
Hb_004772_020		Hb_006970_030	Hb_003494_170
Hb_001205_270		Hb_000905_150	Hb_003517_060
Hb_002542_110		Hb_005623_070	Hb_003835_080
Hb_000378_030		Hb_000237_120	Hb_040290_010
Hb_005424_070		Hb_005130_030	Hb_000445_170
Hb_007037_020		Hb_000000_090	Hb_004837_160
Hb_007911_010		Hb_010029_020	Hb_004837_150
Hb_023308_020		Hb_001005_070	Hb_007662_010
Hb_003168_050		Hb_001006_040	Hb_000107_660
Hb_005063_060		Hb_010126_030	Hb_010883_170
Hb_001279_080		Hb_010142_040	Hb_000110_260
Hb_001279_090		Hb_010164_020	Hb_000012_430
Hb_001345_010		Hb_010174_140	Hb_001300_080
Hb_001352_030		Hb_000103_200	Hb_001329_080
Hb_001916_150		Hb_010417_120	Hb_001386_060
Hb_022998_010		Hb_010422_020	Hb_000152_190
Hb_002450_020		Hb_001051_040	Hb_000156_100
Hb_000260_170		Hb_010661_010	Hb_001623_140
Hb_028763_010		Hb_000108_170	Hb_000171_040
Hb_003038_040		Hb_001080_090	Hb_017711_010
Hb_032215_050		Hb_010872_060	Hb_000215_090
Hb_000366_200		Hb_010931_100	Hb_000221_040
Hb_000480_050		Hb_010998_040	Hb_022132_040
Hb_005000_290		Hb_000110_290	Hb_023344_090
Hb_005623_040		Hb_001140_180	Hb_000025_230
Hb_006916_200		Hb_001141_010	Hb_029584_070
Hb_008071_030		Hb_011512_030	Hb_000320_190
Hb_008791_010		Hb_011633_040	Hb_032202_050
Hb_005623_070		Hb_011930_070	Hb_000327_300
Hb_001741_110		Hb_001195_600	Hb_000347_280
Hb_016602_020		Hb_012019_010	Hb_003486_010
Hb_007520_040		Hb_012038_010	Hb_000035_480
Hb_001159_180		Hb_012092_020	Hb_036850_010
Hb_001252_090		Hb_001218_040	Hb_000039_070
Hb_000189_370		Hb_012180_060	Hb_000042_020
Hb_022092_080		Hb_001220_040	Hb_000429_140
Hb_002215_010		Hb_001221_250	Hb_000466_150
Hb_027380_040		Hb_012320_010	Hb_004800_060
Hb_032278_010		Hb_001235_080	Hb_000483_410
Hb_000327_140		Hb_000125_210	Hb_005629_040
Hb_000501_020		Hb_000125_220	Hb_005976_040
Hb_000521_150		Hb_012506_080	Hb_006615_220
Hb_005536_010		Hb_012539_060	Hb_000700_020
Hb_005888_040		Hb_001258_040	Hb_007304_120
Hb_000635_080		Hb_001268_150	Hb_000739_130
Hb_000645_230		Hb_012725_060	Hb_007432_020
Hb_000795_040		Hb_001277_280	Hb_000959_380
Hb_009476_070		Hb_001295_070	Hb_000098_100
Hb_001304_010		Hb_001318_130	Hb_002873_080
Hb_001377_380		Hb_001328_070	Hb_012560_010
Hb_001687_040		Hb_001357_050	Hb_000905_150
Hb_002007_140		Hb_001357_280	Hb_000000_090
Hb_002031_010		Hb_001366_370	Hb_010029_020
Hb_022693_080		Hb_001366_390	Hb_001007_010
Hb_022693_140		Hb_001369_110	Hb_010080_010
Hb_002284_190		Hb_001369_450	Hb_010142_040
Hb_003428_040		Hb_013868_010	Hb_010164_020
Hb_035267_010		Hb_000139_490	Hb_010174_140
Hb_000441_230		Hb_014068_030	Hb_000103_240
Hb_000050_200		Hb_001408_040	Hb_001030_100
Hb_005276_010		Hb_001411_140	Hb_010361_040
Hb_000640_120		Hb_001416_040	Hb_010402_010
Hb_000671_030		Hb_001433_120	Hb_010417_040
Hb_000690_170		Hb_014700_030	Hb_000107_640
Hb_009588_010		Hb_001477_120	Hb_001085_190
Hb_000997_100		Hb_001489_080	Hb_001089_070
Hb_007547_010		Hb_001511_120	Hb_001105_110
Hb_007571_020		Hb_000152_520	Hb_000111_320
Hb_001631_100		Hb_000152_740	Hb_000111_450
Hb_003663_080		Hb_000152_850	Hb_011161_080
Hb_000388_170		Hb_001520_030	Hb_011181_020
Hb_000040_080		Hb_001565_050	Hb_001140_140
Hb_004447_080		Hb_015934_050	Hb_001140_380
Hb_004803_040		Hb_001604_100	Hb_011457_090
Hb_005100_070		Hb_001627_010	Hb_011457_100
Hb_009252_140		Hb_001636_050	Hb_000116_060
Hb_013925_010		Hb_001646_020	Hb_011609_180
Hb_002150_020		Hb_001652_130	Hb_011609_190
Hb_004064_040		Hb_001660_040	Hb_011640_020
Hb_004082_020		Hb_001688_040	Hb_011909_030
Hb_001364_020		Hb_001711_040	Hb_001195_220
Hb_000347_010		Hb_000172_100	Hb_001195_600
Hb_007951_080		Hb_001728_050	Hb_000120_060
Hb_000115_320		Hb_001741_120	Hb_000120_630
Hb_012239_100		Hb_000175_470	Hb_012019_010
Hb_001318_010		Hb_000175_490	Hb_012038_010
Hb_000152_150		Hb_001776_160	Hb_001205_050
Hb_001545_160		Hb_001780_150	Hb_012132_010
Hb_001673_010		Hb_001797_030	Hb_012180_060
Hb_000002_170		Hb_001832_050	Hb_001220_040
Hb_030565_030		Hb_001840_110	Hb_001229_010
Hb_003371_100		Hb_001842_010	Hb_000123_370
Hb_003777_020		Hb_001860_020	Hb_001235_080
Hb_004321_040		Hb_001881_020	Hb_000125_210
Hb_043585_010		Hb_000189_190	Hb_001250_090
Hb_004785_090		Hb_000189_640	Hb_012506_080
Hb_005324_010		Hb_000019_140	Hb_012573_050
Hb_006136_030		Hb_001935_160	Hb_001266_100
Hb_006634_110		Hb_000197_210	Hb_001269_270
Hb_000814_080		Hb_000198_010	Hb_012725_060
Hb_009236_010		Hb_002016_160	Hb_012762_070
Hb_010126_040		Hb_020224_010	Hb_001277_030
Hb_010187_010		Hb_002028_210	Hb_001277_020
Hb_010334_080		Hb_020400_020	Hb_001314_060
Hb_010589_040		Hb_002045_160	Hb_001318_130
Hb_000107_620		Hb_020665_030	Hb_013405_050
Hb_000108_080		Hb_000208_180	Hb_001369_390
Hb_000109_250		Hb_002081_170	Hb_001369_440
Hb_001188_060		Hb_002085_050	Hb_013868_010
Hb_001235_110		Hb_000215_220	Hb_000140_410
Hb_001357_140		Hb_000216_050	Hb_001408_170
Hb_001514_150		Hb_002188_170	Hb_001416_040
Hb_000017_190		Hb_000220_050	Hb_001439_180
Hb_000181_220		Hb_000221_230	Hb_001473_090
Hb_000181_250		Hb_002217_340	Hb_001473_150
Hb_018487_040		Hb_022250_060	Hb_001501_080
Hb_000189_310		Hb_000223_120	Hb_001505_020
Hb_001894_060		Hb_022501_020	Hb_001507_010
Hb_002042_080		Hb_000226_120	Hb_000152_020
Hb_002046_070		Hb_000230_290	Hb_000152_170
Hb_002261_030		Hb_002304_030	Hb_001562_020
Hb_002413_010		Hb_002311_150	Hb_001578_020
Hb_002471_210		Hb_002354_040	Hb_001623_100
Hb_002473_040		Hb_023562_020	Hb_001652_130
Hb_025490_020		Hb_002374_240	Hb_001660_040
Hb_025964_050		Hb_002400_350	Hb_000172_420
Hb_002614_020		Hb_002411_040	Hb_000175_470
Hb_000272_040		Hb_002471_300	Hb_001752_030
Hb_002863_030		Hb_024714_100	Hb_001754_100
Hb_029664_010		Hb_024714_090	Hb_001772_030
Hb_002999_140		Hb_002477_290	Hb_001775_070
Hb_003038_160		Hb_025052_010	Hb_001775_100
Hb_031091_020		Hb_002519_020	Hb_000179_180
Hb_003486_010		Hb_002527_050	Hb_001797_030
Hb_000367_260		Hb_025525_010	Hb_001805_010
Hb_036850_010		Hb_025526_010	Hb_001811_010
Hb_004148_020		Hb_000258_410	Hb_001811_140
Hb_004156_070		Hb_002603_100	Hb_001863_010
Hb_004310_140		Hb_002613_020	Hb_001902_160
Hb_000465_120		Hb_026419_010	Hb_001902_200
Hb_004954_020		Hb_026698_020	Hb_001948_020
Hb_000497_010		Hb_002678_020	Hb_001951_200
Hb_005184_010		Hb_000270_620	Hb_001951_260
Hb_000556_080		Hb_000270_630	Hb_001952_010
Hb_005590_030		Hb_000275_030	Hb_001956_160
Hb_005615_010		Hb_002774_080	Hb_000198_070
Hb_000562_040		Hb_002798_050	Hb_001999_250
Hb_005731_140		Hb_002805_210	Hb_002016_160
Hb_006557_010		Hb_028621_040	Hb_002026_180
Hb_007426_060		Hb_002922_010	Hb_000206_080
Hb_007765_100		Hb_002929_030	Hb_002078_010
Hb_000783_010		Hb_002942_070	Hb_002078_210
Hb_000886_020		Hb_029510_140	Hb_002081_170
Hb_000935_080		Hb_029584_090	Hb_002085_050
Hb_000964_020		Hb_000297_020	Hb_002107_150
Hb_000983_030		Hb_002995_020	Hb_021576_030
Hb_001922_180		Hb_029952_030	Hb_021596_010
Hb_002435_090		Hb_029977_010	Hb_000220_050
Hb_003327_060		Hb_000300_190	Hb_000221_200
Hb_000388_050		Hb_003010_030	Hb_022250_060
Hb_000795_030		Hb_003010_040	Hb_002259_080
Hb_000905_150		Hb_003018_200	Hb_000226_120
Hb_000000_310		Hb_030328_010	Hb_002263_020
Hb_000000_370		Hb_003062_030	Hb_000227_310
Hb_000010_090		Hb_003097_110	Hb_002282_020
Hb_001003_030		Hb_003097_100	Hb_023047_020
Hb_001008_210		Hb_003117_050	Hb_023536_010
Hb_010142_030		Hb_003177_060	Hb_000237_210
Hb_000103_020		Hb_003185_090	Hb_000239_080
Hb_000103_320		Hb_000032_350	Hb_002450_070
Hb_001040_160		Hb_003207_210	Hb_002498_050
Hb_010583_020		Hb_000322_100	Hb_000025_210
Hb_010775_020		Hb_032202_130	Hb_000025_470
Hb_000108_170		Hb_032602_020	Hb_002510_100
Hb_010968_010		Hb_000329_530	Hb_002519_020
Hb_011161_080		Hb_000331_320	Hb_025214_020
Hb_011224_010		Hb_000336_210	Hb_002527_050
Hb_001124_130		Hb_000343_280	Hb_025342_010
Hb_011310_030		Hb_034310_010	Hb_002553_110
Hb_011472_010		Hb_000345_030	Hb_025592_030
Hb_001157_220		Hb_000345_500	Hb_000258_410
Hb_011656_050		Hb_003498_050	Hb_000260_720
Hb_011671_400		Hb_003502_020	Hb_002603_100
Hb_001172_140		Hb_000356_040	Hb_002613_020
Hb_001186_070		Hb_000358_050	Hb_026198_060
Hb_001186_120		Hb_003654_010	Hb_026549_050
Hb_011925_020		Hb_003659_010	Hb_002660_060
Hb_000120_130		Hb_003667_020	Hb_002685_110
Hb_000120_240		Hb_003673_060	Hb_027337_010
Hb_000120_460		Hb_003687_250	Hb_002739_150
Hb_012019_010		Hb_003749_010	Hb_000275_030
Hb_001202_010		Hb_000384_120	Hb_027654_060
Hb_012022_060		Hb_003847_090	Hb_002774_080
Hb_001205_290		Hb_003849_200	Hb_000028_250
Hb_001205_300		Hb_003935_080	Hb_002805_210
Hb_012092_020		Hb_003939_080	Hb_002818_080
Hb_012132_010		Hb_039946_060	Hb_028396_040
Hb_001218_050		Hb_004007_040	Hb_000286_230
Hb_000122_140		Hb_004096_210	Hb_028693_020
Hb_012305_070		Hb_004154_010	Hb_000029_310
Hb_001232_150		Hb_004157_050	Hb_002928_070
Hb_012519_020		Hb_004195_030	Hb_029695_120
Hb_012519_010		Hb_004195_130	Hb_029977_010
Hb_001252_230		Hb_004204_040	Hb_003029_030
Hb_012565_080		Hb_004204_130	Hb_003058_250
Hb_001269_090		Hb_004223_040	Hb_003078_070
Hb_000127_040		Hb_004223_170	Hb_003098_060
Hb_001277_080		Hb_004228_070	Hb_003117_050
Hb_001277_160		Hb_004310_060	Hb_003207_220
Hb_001277_360		Hb_004342_030	Hb_003248_040
Hb_001304_080		Hb_004366_010	Hb_000329_540
Hb_001318_270		Hb_000441_210	Hb_033153_090
Hb_001318_290		Hb_004453_100	Hb_000336_160
Hb_000134_060		Hb_000045_160	Hb_000340_450
Hb_000134_290		Hb_004545_010	Hb_003417_040
Hb_001359_040		Hb_004598_010	Hb_000342_140
Hb_001366_180		Hb_000462_070	Hb_003506_030
Hb_001366_190		Hb_000462_110	Hb_003544_030
Hb_001369_590		Hb_004668_050	Hb_003549_060
Hb_013726_030		Hb_004678_020	Hb_000358_050
Hb_001383_060		Hb_004724_210	Hb_000363_020
Hb_001384_040		Hb_048937_030	Hb_003638_060
Hb_001390_110		Hb_004899_050	Hb_000367_070
Hb_000014_150		Hb_000049_100	Hb_003673_060
Hb_000140_080		Hb_000490_030	Hb_003685_070
Hb_001426_050		Hb_000050_120	Hb_003687_250
Hb_001427_060		Hb_005048_120	Hb_000373_170
Hb_001439_170		Hb_005054_370	Hb_000375_090
Hb_001443_010		Hb_005081_020	Hb_003771_010
Hb_001452_010		Hb_000510_240	Hb_000038_060
Hb_001452_140		Hb_005211_140	Hb_000384_120
Hb_014720_020		Hb_005214_140	Hb_038606_010
Hb_001482_050		Hb_000522_170	Hb_003891_060
Hb_014834_120		Hb_005271_130	Hb_000392_220
Hb_001487_010		Hb_000053_120	Hb_003935_080
Hb_001493_050		Hb_005305_070	Hb_003943_110
Hb_014988_010		Hb_005305_080	Hb_000395_120
Hb_001504_070		Hb_005305_130	Hb_003992_260
Hb_001504_250		Hb_005306_020	Hb_003994_150
Hb_001511_200		Hb_005321_030	Hb_004126_020
Hb_000152_500		Hb_005332_150	Hb_004143_050
Hb_000152_520		Hb_005333_120	Hb_004143_120
Hb_001546_090		Hb_000537_090	Hb_041433_010
Hb_001579_200		Hb_005463_020	Hb_000417_190
Hb_001584_340		Hb_005488_160	Hb_000042_400
Hb_015934_040		Hb_005488_170	Hb_004204_130
Hb_000160_120		Hb_000556_040	Hb_004223_040
Hb_001616_080		Hb_005718_010	Hb_004223_120
Hb_001628_110		Hb_000574_470	Hb_004228_070
Hb_001663_060		Hb_000590_110	Hb_004242_170
Hb_016697_010		Hb_005914_160	Hb_004324_050
Hb_001693_020		Hb_005914_220	Hb_004324_240
Hb_001699_240		Hb_000597_110	Hb_004324_250
Hb_000170_010		Hb_006106_020	Hb_004342_030
Hb_000175_160		Hb_000614_170	Hb_004374_050
Hb_001754_110		Hb_006157_010	Hb_004449_020
Hb_001772_030		Hb_006198_060	Hb_000450_160
Hb_017987_040		Hb_000625_090	Hb_004551_010
Hb_000018_040		Hb_000627_120	Hb_000457_230
Hb_000181_330		Hb_006336_010	Hb_004607_020
Hb_001811_160		Hb_000638_070	Hb_004619_050
Hb_001814_050		Hb_000645_200	Hb_000462_070
Hb_001832_130		Hb_000645_190	Hb_004648_110
Hb_001833_060		Hb_006501_010	Hb_000465_150
Hb_001856_190		Hb_006538_150	Hb_000466_070
Hb_001953_020		Hb_006615_240	Hb_004668_050
Hb_019586_020		Hb_000665_120	Hb_004678_020
Hb_001969_010		Hb_000676_270	Hb_004803_020
Hb_000197_210		Hb_000680_110	Hb_004812_010
Hb_000197_260		Hb_000069_690	Hb_000485_070
Hb_001975_130		Hb_000069_760	Hb_048937_030
Hb_001977_020		Hb_000070_180	Hb_004899_050
Hb_002000_100		Hb_007044_060	Hb_000049_100
Hb_002016_100		Hb_007072_020	Hb_000490_030
Hb_002027_130		Hb_000720_130	Hb_004931_050
Hb_002028_210		Hb_000720_120	Hb_000050_120
Hb_002053_030		Hb_007218_100	Hb_005016_130
Hb_002067_120		Hb_007229_090	Hb_005050_030
Hb_002078_300		Hb_007307_010	Hb_005081_020
Hb_000208_290		Hb_000732_040	Hb_000510_140
Hb_021056_010		Hb_007370_010	Hb_000521_110
Hb_002107_070		Hb_000739_190	Hb_005247_020
Hb_000212_320		Hb_007417_010	Hb_005305_130
Hb_002126_020		Hb_000742_220	Hb_005305_140
Hb_021596_070		Hb_007441_140	Hb_005306_020
Hb_002193_010		Hb_007451_080	Hb_000531_100
Hb_002217_110		Hb_000753_250	Hb_005321_030
Hb_002217_170		Hb_000754_040	Hb_005333_120
Hb_002217_280		Hb_000077_320	Hb_000537_160
Hb_000223_120		Hb_000077_310	Hb_005488_160
Hb_002232_360		Hb_000787_130	Hb_005488_170
Hb_002235_210		Hb_007883_010	Hb_005496_100
Hb_002259_090		Hb_000806_110	Hb_005511_100
Hb_000227_180		Hb_008122_020	Hb_005527_060
Hb_000227_310		Hb_000817_030	Hb_000556_040
Hb_002272_020		Hb_008177_040	Hb_005568_060
Hb_002298_050		Hb_008177_050	Hb_005614_020
Hb_000023_310		Hb_000083_280	Hb_005618_090
Hb_002303_020		Hb_000832_270	Hb_000567_280
Hb_002311_210		Hb_000836_120	Hb_005723_090
Hb_002311_300		Hb_008451_020	Hb_005914_160
Hb_002316_120		Hb_000085_080	Hb_000597_110
Hb_002320_060		Hb_000086_440	Hb_000599_190
Hb_023226_040		Hb_000086_500	Hb_000599_200
Hb_002326_170		Hb_000878_100	Hb_005993_040
Hb_002329_020		Hb_000892_070	Hb_006052_030
Hb_023344_120		Hb_000009_220	Hb_006120_090
Hb_002354_040		Hb_000009_470	Hb_000617_230
Hb_002368_100		Hb_000906_130	Hb_000622_290
Hb_002378_010		Hb_000908_030	Hb_000631_130
Hb_002380_010		Hb_009252_120	Hb_000638_070
Hb_002391_210		Hb_000934_180	Hb_000640_210
Hb_002400_350		Hb_000935_010	Hb_006570_070
Hb_002450_180		Hb_000951_010	Hb_006585_010
Hb_002477_290		Hb_009545_100	Hb_000676_270
Hb_002498_050		Hb_000960_040	Hb_006788_160
Hb_002502_040		Hb_000964_030	Hb_000680_110
Hb_002518_270		Hb_009659_030	Hb_006829_110
Hb_025342_010		Hb_000976_240	Hb_000684_400
Hb_000254_020		Hb_009771_100	Hb_000069_760
Hb_025525_010		Hb_000099_030	Hb_000692_230
Hb_002559_020		Hb_001013_040	Hb_000696_070
Hb_025592_030		Hb_010222_010	Hb_000070_070
Hb_002566_020		Hb_042463_010	Hb_007044_060
Hb_002570_050		Hb_001375_010	Hb_007108_030
Hb_002600_070		Hb_001956_060	Hb_000072_010
Hb_002603_120		Hb_001956_050	Hb_000723_010
Hb_026198_060		Hb_024470_010	Hb_007257_050
Hb_002639_050		Hb_001016_080	Hb_007304_040
Hb_002660_060		Hb_010174_060	Hb_007307_010
Hb_002662_100		Hb_001049_070	Hb_000732_020
Hb_026698_020		Hb_010617_020	Hb_007451_080
Hb_002681_020		Hb_010705_020	Hb_007570_030
Hb_002681_090		Hb_010712_020	Hb_007632_070
Hb_002681_140		Hb_010712_030	Hb_000775_020
Hb_027406_030		Hb_001090_030	Hb_007760_060
Hb_027445_060		Hb_011316_060	Hb_000784_040
Hb_002754_010		Hb_011344_050	Hb_000784_050
Hb_000283_060		Hb_011909_060	Hb_007846_040
Hb_000286_230		Hb_011915_020	Hb_007904_120
Hb_000286_250		Hb_012016_020	Hb_000799_050
Hb_002876_160		Hb_012022_130	Hb_008013_030
Hb_028806_010		Hb_001251_070	Hb_000815_280
Hb_002890_210		Hb_001396_210	Hb_008214_010
Hb_000029_070		Hb_001418_040	Hb_000083_280
Hb_029072_010		Hb_000142_030	Hb_000832_270
Hb_002922_010		Hb_001454_360	Hb_000840_150
Hb_000003_050		Hb_001794_110	Hb_008451_020
Hb_000003_100		Hb_000197_270	Hb_000086_030
Hb_000003_600		Hb_002025_100	Hb_000086_040
Hb_000300_140		Hb_000265_180	Hb_008695_090
Hb_003020_300		Hb_002750_050	Hb_008700_010
Hb_003023_060		Hb_002788_040	Hb_000878_020
Hb_030512_010		Hb_028015_020	Hb_000878_100
Hb_003053_090		Hb_002900_070	Hb_000892_070
Hb_003062_020		Hb_029879_080	Hb_000009_170
Hb_003078_070		Hb_003088_010	Hb_000009_220
Hb_000310_120		Hb_000031_180	Hb_000009_470
Hb_003124_180		Hb_003125_050	Hb_000908_030
Hb_003157_010		Hb_003125_060	Hb_009189_080
Hb_003177_060		Hb_003175_110	Hb_000922_040
Hb_000318_390		Hb_031910_030	Hb_009310_010
Hb_003207_170		Hb_000032_460	Hb_000935_010
Hb_003248_040		Hb_033412_010	Hb_009545_100
Hb_000329_430		Hb_004030_050	Hb_000960_040
Hb_000329_560		Hb_004032_270	Hb_000976_240
Hb_000329_570		Hb_000042_170	Hb_000098_040
Hb_000331_330		Hb_000046_040	Hb_004079_120
Hb_003363_110		Hb_000465_230	Hb_005623_070
Hb_003371_040		Hb_000465_350	Hb_000926_260
Hb_003371_280		Hb_004845_020	Hb_011264_010
Hb_003399_050		Hb_000487_420	Hb_001016_080
Hb_034055_010		Hb_004954_070	Hb_010174_060
Hb_003417_040		Hb_005043_010	Hb_000103_060
Hb_003428_130		Hb_005729_040	Hb_010921_010
Hb_000345_170		Hb_005883_030	Hb_001117_100
Hb_003453_060		Hb_006470_020	Hb_012088_010
Hb_000347_430		Hb_006713_040	Hb_001241_020
Hb_000352_170		Hb_000672_080	Hb_012799_040
Hb_003564_010		Hb_000684_180	Hb_001318_260
Hb_000358_250		Hb_000684_380	Hb_001318_250
Hb_003605_070		Hb_007441_090	Hb_001366_260
Hb_003622_030		Hb_000080_200	Hb_000139_090
Hb_036268_010		Hb_000815_220	Hb_001418_040
Hb_000363_370		Hb_000836_380	Hb_000142_030
Hb_003643_090		Hb_008616_070	Hb_016038_010
Hb_003645_060		Hb_008725_280	Hb_000170_060
Hb_003656_140		Hb_000904_090	Hb_001780_020
Hb_000368_120		Hb_009411_010	Hb_002046_180
Hb_003747_100		Hb_000975_320	Hb_000228_050
Hb_000375_320		Hb_009268_150	Hb_002301_200
Hb_000375_310		Hb_000151_040	Hb_023661_070
Hb_000375_350		Hb_001655_030	Hb_024898_030
Hb_003754_060		Hb_000227_270	Hb_002572_030
Hb_003786_080		Hb_002411_160	Hb_002701_060
Hb_000038_060		Hb_002837_120	Hb_002701_210
Hb_000390_140		Hb_000307_110	Hb_002849_170
Hb_003943_130		Hb_000359_020	Hb_029695_070
Hb_000004_150		Hb_004774_080	Hb_002979_030
Hb_004055_120		Hb_004966_050	Hb_029879_080
Hb_004097_120		Hb_005731_130	Hb_003031_020
Hb_041201_010		Hb_006257_010	Hb_003088_010
Hb_004176_010		Hb_000928_060	Hb_000031_180
Hb_000419_130		Hb_002660_190	Hb_003125_050
Hb_000042_340		Hb_000368_090	Hb_003125_060
Hb_004218_010		Hb_039325_010	Hb_003149_020
Hb_000422_090		Hb_005663_070	Hb_003581_280
Hb_004223_040		Hb_007575_080	Hb_003857_020
Hb_004223_170		Hb_000826_060	Hb_003965_010
Hb_004235_040		Hb_001691_060	Hb_004030_050
Hb_004243_030			Hb_004076_050
Hb_004324_090			Hb_004241_010
Hb_004352_020			Hb_004612_010
Hb_004366_010			Hb_005180_010
Hb_004410_040			Hb_000522_140
Hb_004414_050			Hb_005271_070
Hb_000442_100			Hb_000567_050
Hb_044653_030			Hb_000603_070
Hb_045002_010			Hb_000603_220
Hb_004517_030			Hb_006120_110
Hb_000453_240			Hb_000062_070
Hb_004567_090			Hb_006452_100
Hb_004570_030			Hb_000679_270
Hb_000046_130			Hb_007821_030
Hb_000046_260			Hb_000904_090
Hb_000465_040			Hb_009780_110
Hb_004659_120			Hb_001596_040
Hb_004690_030			Hb_001655_030
Hb_004724_140			Hb_000002_210
Hb_004800_250			Hb_000260_540
Hb_000482_180			Hb_000003_240
Hb_000483_250			Hb_003053_060
Hb_000483_280			Hb_003376_230
Hb_004846_060			Hb_003428_040
Hb_004896_020			Hb_041695_010
Hb_004931_050			Hb_006257_010
Hb_004931_060			Hb_000951_040
Hb_000496_100
Hb_000500_040
Hb_005061_020
Hb_005081_020
Hb_005098_030
Hb_000522_170
Hb_000523_080
Hb_005259_010
Hb_000053_120
Hb_000531_040
Hb_005357_010
Hb_000538_080
Hb_000054_100
Hb_005539_120
Hb_000554_010
Hb_005649_020
Hb_000567_140
Hb_005701_110
Hb_000571_120
Hb_000574_020
Hb_000574_160
Hb_005748_020
Hb_005800_030
Hb_000059_200
Hb_005979_040
Hb_000603_210
Hb_000606_130
Hb_000609_090
Hb_000622_290
Hb_006253_030
Hb_000628_040
Hb_000635_060
Hb_000656_120
Hb_006573_210
Hb_000665_060
Hb_006718_040
Hb_000680_090
Hb_000683_150
Hb_006831_030
Hb_006846_110
Hb_000685_040
Hb_000069_780
Hb_006919_010
Hb_000692_150
Hb_006995_010
Hb_000705_280
Hb_007072_020
Hb_000071_080
Hb_000720_170
Hb_000732_040
Hb_007336_030
Hb_000739_200
Hb_007472_100
Hb_007545_080
Hb_007558_100
Hb_007558_090
Hb_007590_080
Hb_007590_100
Hb_007643_050
Hb_007722_010
Hb_007849_010
Hb_007850_030
Hb_000787_070
Hb_000803_070
Hb_008096_020
Hb_008115_030
Hb_008122_020
Hb_000816_200
Hb_008215_020
Hb_000826_050
Hb_008289_060
Hb_000836_010
Hb_000853_050
Hb_000856_130
Hb_008598_010
Hb_000086_280
Hb_000086_500
Hb_000086_640
Hb_000861_010
Hb_000862_040
Hb_000866_450
Hb_008749_090
Hb_000088_100
Hb_008878_010
Hb_000898_070
Hb_000009_090
Hb_000900_050
Hb_009020_040
Hb_000906_130
Hb_000907_140
Hb_000908_020
Hb_000908_070
Hb_009109_030
Hb_009135_020
Hb_000917_320
Hb_009189_100
Hb_000921_110
Hb_000926_200
Hb_000935_010
Hb_009355_010
Hb_000957_010
Hb_000964_070
Hb_000976_340
Hb_000982_060
Hb_000984_050
Hb_000996_030
Hb_010222_050
Hb_001109_110
Hb_001758_110
Hb_000248_100
Hb_002488_030
Hb_000261_530
Hb_003003_060
Hb_003373_030
Hb_003502_060
Hb_003602_070
Hb_000375_250
Hb_003750_030
Hb_003777_200
Hb_000380_040
Hb_004117_170
Hb_006452_170
Hb_007137_050
Hb_007227_010
Hb_000740_150
Hb_007437_010
Hb_000934_210
Hb_002524_010
Hb_000609_100
Hb_000819_080
Hb_022700_030
Hb_011515_020
Hb_001923_030
Hb_000345_020
Hb_019496_010
Hb_020178_020
Hb_001500_120
Hb_024324_010
Hb_001269_550
Hb_000007_330
Hb_001053_070
Hb_003609_040
Hb_002814_130
Hb_001607_010
Hb_010287_030
Hb_010337_030
Hb_000137_150
Hb_006721_030
Hb_008871_010
Hb_020712_030
Hb_000557_030
Hb_007497_010
Hb_025652_010
Hb_001898_040
Hb_003185_010
Hb_028816_010
Hb_000406_030
Hb_000075_010
Hb_027346_020
Hb_001911_040
Hb_011355_040
Hb_019187_020
Hb_001677_040
Hb_001797_010
Hb_000220_100
Hb_003407_010
Hb_010588_020
Hb_011282_050
Hb_002665_030
Hb_015427_010
Hb_003914_050
Hb_000505_010
Hb_005882_020
Hb_006096_040
Hb_000007_160
Hb_007416_040
Hb_009083_030
Hb_000260_180
Hb_004652_020
Hb_010029_010
Hb_001990_020
Hb_003673_060
[truncated: 102 more rows]
